# Supplementary material for: Characterization of the binding of six actinyls AnO22+/+(An = U/Np/Pu) with three expanded porphyrins by density functional theory
Source: Royal Society of Chemistry journal article supplement (doi:10.1039/c6nj01615d), 2016-11-04
Supplement: c6nj01615d1.pdf [file c6nj01615d1.pdf]

## ELECTRONIC SUPPLEMENTARY INFORMATION

# Characterization of the binding of six actinyls $\text{AnO}_2^{2+/+}$ (An = U/Np/Pu) with three expanded porphyrins by density functional theory

Meixiu Yang<sup>†, ‡</sup>, Wanjian Ding<sup>†, \*</sup>, Dongqi Wang<sup>†, \*</sup>

<sup>†</sup>Key Laboratory of Theoretical and Computational Photochemistry, Ministry of Education,  
College of Chemistry, Beijing Normal University, Beijing 100875, China

and

<sup>‡</sup>CAS Key Laboratory of Nuclear Radiation and Nuclear Energy Techniques, Institute of High  
Energy Physics, Chinese Academy of Sciences, Beijing 100049, China

### Content

1. The optimized structures of  $\text{H}_2\text{L}^{1-}$ ,  $\text{L}^{2-}$ , and  $\text{L}^{3-}$  ligands and their complexes with  $\text{AnO}_2^{2+/+}$  in vacuum and in methanol.
2. The calculated energies of different isomers of the three ligands in vacuum and in methanol.
3. The influence of protonation on the complexation.
4. Key geometrical parameters of the actinyls and the corresponding complexes.
5. The population analysis of the complexes in methanol.
6. The four quantities in the framework of AIM technique of the complexes in methanol.
7. The NICS values of the ligands and their complexation states with  $\text{AnO}_2^{2+/+}$  (An = U, Np, Pu) in methanol.
8. The population analysis of the bare  $\text{AnO}_2^{2+/+}$  and  $\text{AnO}_2(\text{H}_2\text{O})_5^{2+/+}$  in vacuum and in methanol.
9. The integration accuracy and the convergence criteria in our calculations.
10. Coordinates and energies of stationary points.

1. The optimized structures of  $H_2L1^{2-}$ ,  $L2^{2-}$ , and  $L3^{3-}$  ligands and their complexes with  $AnO_2^{2+/+}$  in vacuum and in methanol.

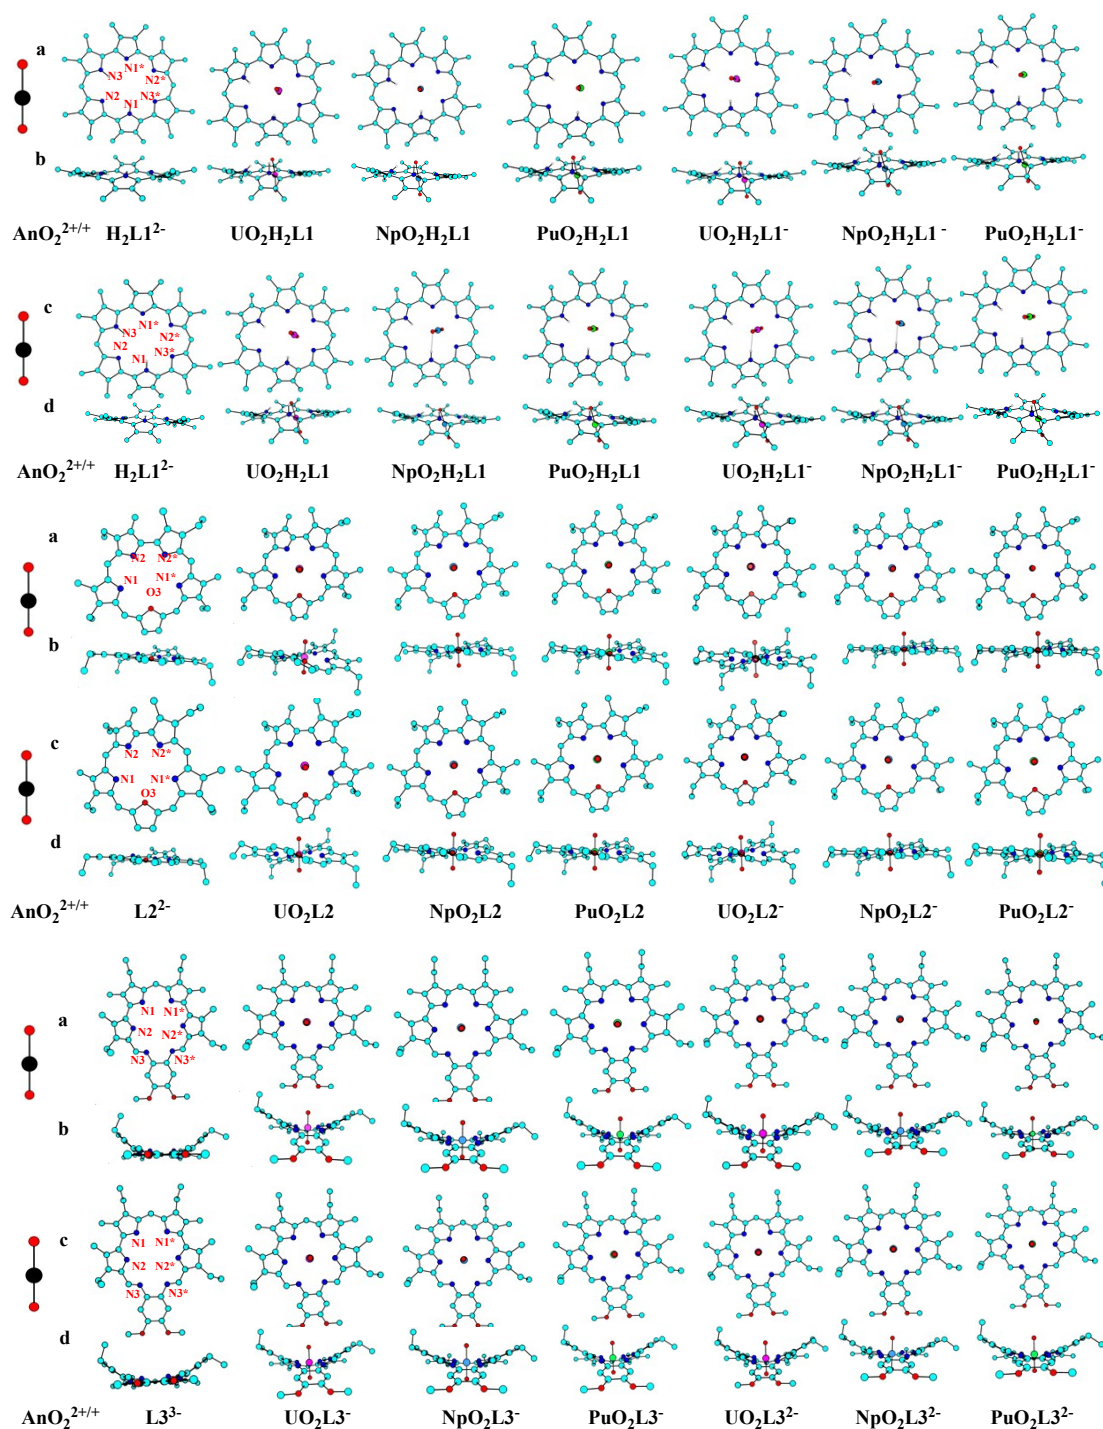

**Figure S1.** The optimized structures of the ligands  $H_2L1^{2-}$ ,  $L2^{2-}$ , and  $L3^{3-}$ , and their complexes with  $AnO_2^{2+/+}$  (hydrogens are omitted for clarity) in vacuum (a,b) and in methanol (c,d). (a,c) top view; (b,d) side view.

## 2. The calculated energies of different isomers of the three ligands in vacuum and in methanol

**Table S1.** The relative energies of isomers of the three ligands in vacuum and in methanol.

|                   |        | $\Delta G(\text{kcal/mol})$ |      | $\Delta E(\text{kcal/mol})$ |      | $\Delta H(\text{kcal/mol})$ |      |
|-------------------|--------|-----------------------------|------|-----------------------------|------|-----------------------------|------|
|                   |        | Gas                         | MeOH | Gas                         | MeOH | Gas                         | MeOH |
| H <sub>4</sub> L1 | 131*3* | 0.0                         | 0.0  | 0.0                         | 0.0  | 0.0                         | 0.0  |
|                   | 131*2* | 0.2                         | 0.2  | 0.1                         | -0.1 | 0.0                         | -0.1 |
|                   | 1*233* | 13.6                        | 10.5 | 13.6                        | 10.3 | 13.6                        | 10.2 |
|                   | 1*2*23 | 17.8                        | 13.1 | 18.0                        | 13.2 | 18.1                        | 13.3 |
|                   | 232*3* | 22.9                        | 18.8 | 23.0                        | 18.5 | 22.9                        | 18.5 |
|                   | 1231*  | 33.2                        | 19.7 | 33.3                        | 19.5 | 33.3                        | 19.7 |
| H <sub>2</sub> L2 | 12*    | 0.0                         | 0.0  | 0.0                         | 0.0  | 0.0                         | 0.0  |
|                   | 11*    | 1.7                         | 1.8  | 2.9                         | 2.5  | 3.2                         | 2.7  |
|                   | 22*    | 5.8                         | 4.5  | 5.3                         | 4.5  | 5.2                         | 4.4  |
|                   | 12     | 17.8                        | 13.4 | 18.4                        | 13.5 | 18.5                        | 13.5 |
| H <sub>3</sub> L3 | 122*   | 0.0                         | 0.0  | 0.0                         | 0.0  | 0.0                         | 0.0  |
|                   | 132*   | 3.4                         | 2.8  | 3.2                         | 2.4  | 3.0                         | 2.2  |
|                   | 123*   | 8.2                         | 5.8  | 8.0                         | 5.8  | 7.9                         | 5.7  |
|                   | 131*   | 18.7                        | 15.1 | 19.4                        | 15.5 | 19.4                        | 15.4 |
|                   | 121*   | 19.5                        | 14.7 | 20.1                        | 15.0 | 20.2                        | 15.0 |
|                   | 133*   | 20.7                        | 16.2 | 21.6                        | 16.6 | 21.7                        | 16.7 |
|                   | 231*   | 21.1                        | 15.2 | 21.2                        | 15.2 | 21.0                        | 15.0 |
|                   | 232*   | 23.9                        | 17.3 | 24.2                        | 17.3 | 24.1                        | 17.2 |
|                   | 123    | 30.1                        | 20.2 | 29.7                        | 20.2 | 29.4                        | 20.0 |
|                   | 233*   | 44.6                        | 34.2 | 46.1                        | 34.2 | 46.2                        | 34.2 |

## 3. The influence of protonation on the complexation

In order to understand the effect of protonation on the complexation of penta-aquo actinyl complexes with the ePor and find an optimal pathway in terms of thermodynamics, H<sub>4</sub>L1 was selected to elucidate the complexation and the deprotonation processes. The following stepwise mechanism has been considered and the results are plotted in Figure S2:

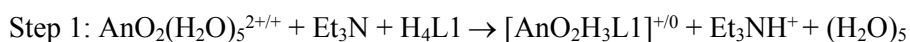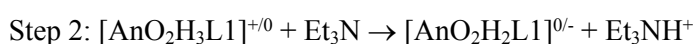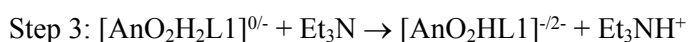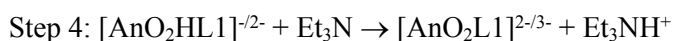

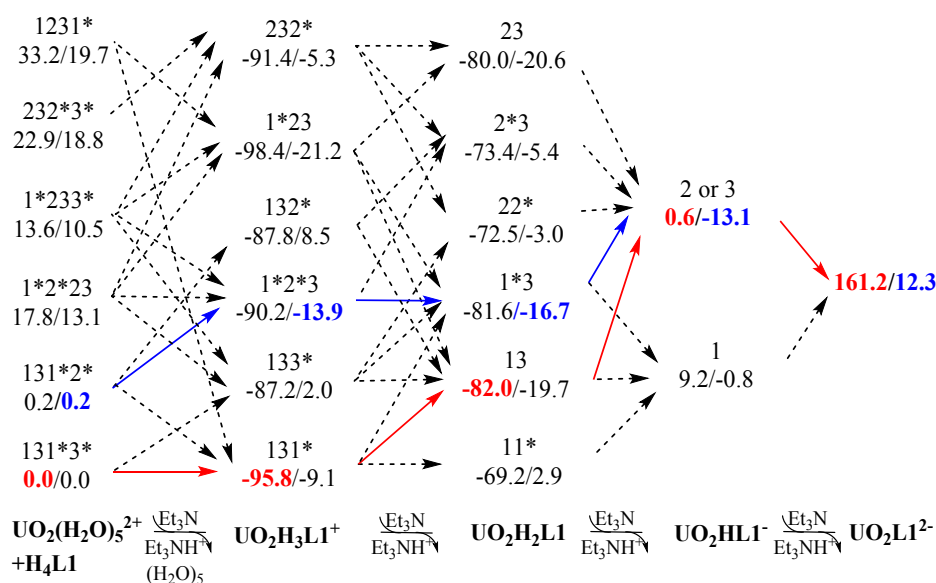

**Figure S2.** Stepwise mechanism for the complexation of  $\text{UO}_2(\text{H}_2\text{O})_5^{2+}$  with  $\text{H}_4\text{L1}$  assisted by  $\text{Et}_3\text{N}$ . The Gibbs free energy change (kcal/mol) of the sequential deprotonation reaction is given in the format of  $\Delta G_{\text{vacuum}}/\Delta G_{\text{MeOH}}$  with respect to the total free energy of  $\text{H}_4\text{L1}_{131^*3^*}$ ,  $\text{UO}_2(\text{H}_2\text{O})_5^{2+}$ , and 4  $\text{Et}_3\text{N}$ , and the  $\Delta G_{\text{vacuum}}/\Delta G_{\text{MeOH}}$  of  $\text{UO}_2(\text{H}_2\text{O})_5^{2+} + \text{H}_4\text{L1}$  is with respect to the total free energy of  $\text{UO}_2(\text{H}_2\text{O})_5^{2+}$ ,  $\text{H}_4\text{L1}_{131^*3^*}$  and 4 $\text{Et}_3\text{N}$ . The solid arrows represent the optimal deprotonation path (red for in vacuum and blue for in MeOH).

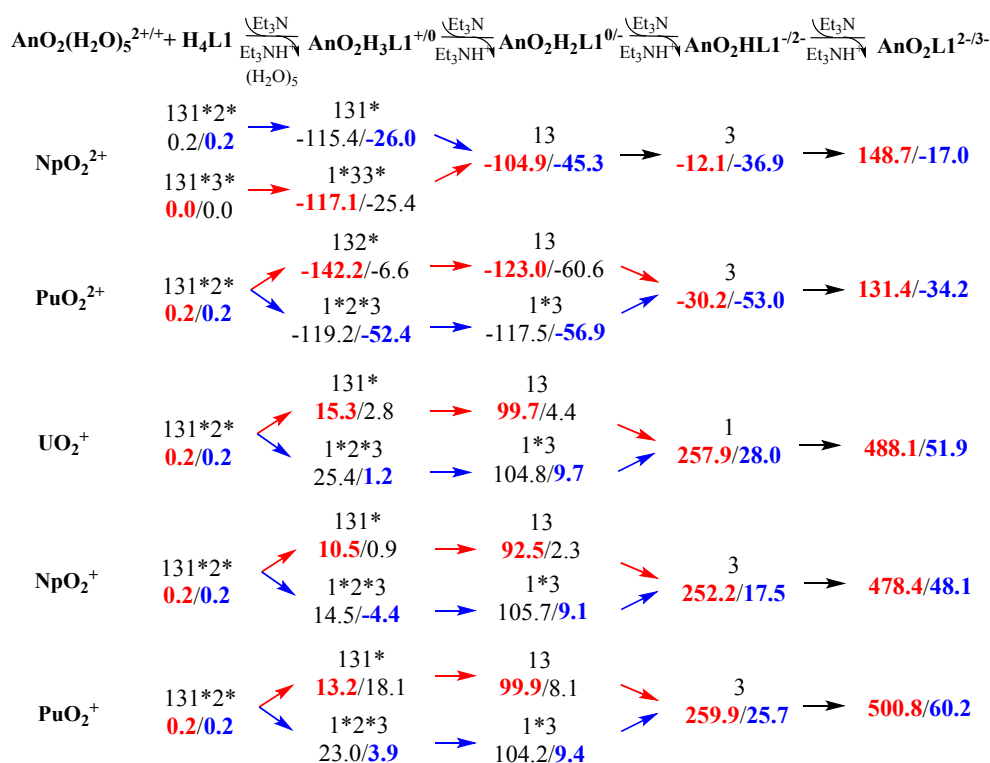

**Figure S3.** The optimum pathways (red for in vacuum and blue for in MeOH) for the coordination of  $\text{AnO}_2(\text{H}_2\text{O})_5^{2+/+}$  (An = Np/Pu) and  $\text{UO}_2(\text{H}_2\text{O})_5^+$  with  $\text{H}_4\text{L1}_{131^*3^*}$  or  $\text{H}_4\text{L1}_{131^*2^*}$  assisted by  $\text{Et}_3\text{N}$ . The Gibbs free energy change (kcal/mol) of the sequential deprotonation reaction is given in the format of  $\Delta G_{\text{vacuum}}/\Delta G_{\text{MeOH}}$ .

#### 4. Key geometrical parameters of the actinyl and the corresponding complexes

**Table S2.** Key geometrical parameters (bond length in Å, bond angle in degree) for the  $\text{AnO}_2^{2+/+}$  and their complexes with  $\text{H}_2\text{L}1^{2-}$ ,  $\text{L}2^{2-}$ ,  $\text{L}3^{3-}$  ligand in methanol.

|                                                   | An-X             |           |                            |                          | An-O <sup>yl</sup> |                       | <i>bare</i> An- |           |
|---------------------------------------------------|------------------|-----------|----------------------------|--------------------------|--------------------|-----------------------|-----------------|-----------|
|                                                   | N1/N1*           | N2/N2*    | N3(O3) <sup>(a)</sup> /N3* | $\bar{d}$ <sup>(b)</sup> | O1/O2              | $\angle\text{O-An-O}$ | O1/O2           |           |
| AnO <sub>2</sub> H <sub>2</sub> L1 <sup>0/-</sup> | U <sup>VI</sup>  | 3.02/2.47 | 3.88/2.38                  | 3.80/2.46                | 3.00               | 1.76/1.76             | 179.7           | 1.72/1.72 |
|                                                   | Np <sup>VI</sup> | 3.24/2.54 | 3.86/2.46                  | 3.60/2.57                | 3.04               | 1.80/1.81             | 179.2           | 1.70/1.70 |
|                                                   | Pu <sup>VI</sup> | 3.20/2.53 | 3.81/2.46                  | 3.57/2.57                | 3.02               | 1.77/1.79             | 179.4           | 1.68/1.68 |
|                                                   | U <sup>V</sup>   | 3.31/2.53 | 3.94/2.45                  | 3.66/2.59                | 2.97               | 1.80/1.82             | 171.2           | 1.79/1.79 |
|                                                   | Np <sup>V</sup>  | 3.25/2.53 | 3.91/2.44                  | 3.66/2.54                | 3.06               | 1.81/1.82             | 177.8           | 1.76/1.76 |
|                                                   | Pu <sup>V</sup>  | 3.19/2.53 | 3.86/2.44                  | 3.66/2.53                | 3.04               | 1.78/1.79             | 178.4           | 1.75/1.75 |
| AnO <sub>2</sub> L2 <sup>0/-</sup>                | U <sup>VI</sup>  | 2.56/2.56 | 2.47/2.47                  | 2.68                     | 2.55               | 1.76/1.76             | 176.0           |           |
|                                                   | Np <sup>VI</sup> | 2.66/2.63 | 2.55/2.54                  | 2.73                     | 2.62               | 1.81/1.80             | 178.3           |           |
|                                                   | Pu <sup>VI</sup> | 2.65/2.63 | 2.55/2.54                  | 2.73                     | 2.62               | 1.78/1.78             | 178.9           |           |
|                                                   | U <sup>V</sup>   | 2.54/2.54 | 2.46/2.46                  | 2.68                     | 2.54               | 1.77/1.77             | 175.7           |           |
|                                                   | Np <sup>V</sup>  | 2.66/2.67 | 2.55/2.55                  | 2.75                     | 2.64               | 1.81/1.81             | 177.4           |           |
|                                                   | Pu <sup>V</sup>  | 2.66/2.66 | 2.55/2.55                  | 2.75                     | 2.63               | 1.79/1.79             | 178.3           |           |
| AnO <sub>2</sub> L3 <sup>-2/-</sup>               | U <sup>VI</sup>  | 2.67/2.67 | 2.52/2.52                  | 2.79/2.79                | 2.66               | 1.76/1.77             | 179.1           |           |
|                                                   | Np <sup>VI</sup> | 2.73/2.74 | 2.57/2.58                  | 2.87/2.87                | 2.72               | 1.81/1.82             | 179.5           |           |
|                                                   | Pu <sup>VI</sup> | 2.69/2.68 | 2.50/2.50                  | 2.79/2.79                | 2.66               | 1.73/1.73             | 179.5           |           |
|                                                   | U <sup>V</sup>   | 2.59/2.59 | 2.54/2.54                  | 2.91/2.91                | 2.68               | 1.78/1.78             | 178.0           |           |
|                                                   | Np <sup>V</sup>  | 2.74/2.73 | 2.58/2.59                  | 2.90/2.90                | 2.74               | 1.82/1.82             | 179.2           |           |
|                                                   | Pu <sup>V</sup>  | 2.76/2.75 | 2.58/2.58                  | 2.88/2.88                | 2.74               | 1.80/1.80             | 179.2           |           |

(a) For the complexes of  $\text{AnO}_2\text{H}_2\text{L}1^{0/-}$  and  $\text{AnO}_2\text{L}3^{-2/-}$ , X = N3/N3\*, and for the complex  $\text{AnO}_2\text{L}2^{0/-}$ , X = O3;

(b) Arithmetic mean of the bond lengths in the equatorial plane of actinides;

**Table S3.** Key geometrical parameters (bond length in Å, bond angle in degree) of  $\text{UO}_2^{2+}$  and its complexes with  $\text{H}_4\text{L}1$  ligand in vacuum.

| U <sup>VI</sup>                        | U-N <sub>i</sub> |      |      |      |      |      | U-O <sup>yl</sup>        |      |      | T <sub>A</sub> <sup>(b)</sup> |                      |
|----------------------------------------|------------------|------|------|------|------|------|--------------------------|------|------|-------------------------------|----------------------|
|                                        | N1               | N2   | N3   | N1*  | N2*  | N3*  | $\bar{d}$ <sup>(a)</sup> | O1   | O2   |                               | $\angle\text{O-U-O}$ |
| UO <sub>2</sub> <sup>2+</sup>          |                  |      |      |      |      |      |                          | 1.68 | 1.68 | 180.0                         |                      |
| UO <sub>2</sub> L1 <sup>2-</sup>       | 2.62             | 2.91 | 2.91 | 2.62 | 2.91 | 2.91 | 2.81                     | 1.74 | 1.74 | 180.0                         | 360.2                |
| UO <sub>2</sub> L1H <sup>-(1)</sup>    | 3.29             | 3.06 | 2.68 | 2.43 | 2.68 | 3.06 | 2.86                     | 1.74 | 1.75 | 174.0                         | 360.9                |
| UO <sub>2</sub> L1H <sup>-(2)</sup>    | 2.61             | 3.76 | 3.44 | 2.51 | 2.48 | 2.48 | 2.88                     | 1.75 | 1.75 | 174.5                         | 360.3                |
| UO <sub>2</sub> L1H <sub>2</sub> (23)  | 2.59             | 3.73 | 3.71 | 2.53 | 2.42 | 2.41 | 2.90                     | 1.75 | 1.75 | 170.6                         | 360.3                |
| UO <sub>2</sub> L1H <sub>2</sub> (11*) | 2.83             | 2.79 | 2.77 | 2.76 | 2.77 | 2.79 | 2.79                     | 1.74 | 1.74 | 178.5                         | 363.4                |
| UO <sub>2</sub> L1H <sub>2</sub> (13)  | 2.81             | 3.64 | 3.68 | 2.49 | 2.41 | 2.48 | 2.92                     | 1.74 | 1.75 | 171.8                         | 359.1                |
| UO <sub>2</sub> L1H <sub>2</sub> (12)  | 2.94             | 3.86 | 3.32 | 2.41 | 2.42 | 2.49 | 2.91                     | 1.75 | 1.75 | 170.8                         | 360.3                |

|                                                       |      |      |      |      |      |      |      |      |      |       |       |
|-------------------------------------------------------|------|------|------|------|------|------|------|------|------|-------|-------|
| UO <sub>2</sub> L1H <sub>2</sub> (2*3)                | 2.42 | 2.67 | 2.92 | 2.64 | 3.37 | 2.96 | 2.83 | 1.74 | 1.75 | 176.7 | 360.3 |
| UO <sub>2</sub> L1H <sub>2</sub> (22*)                | 2.50 | 2.99 | 3.37 | 2.54 | 2.67 | 2.93 | 2.83 | 1.74 | 1.74 | 179.1 | 360.5 |
| UO <sub>2</sub> L1H <sub>3</sub> <sup>+</sup> (1*23)  | 2.80 | 3.84 | 3.64 | 2.49 | 2.36 | 2.43 | 2.93 | 1.75 | 1.75 | 168.5 | 359.7 |
| UO <sub>2</sub> L1H <sub>3</sub> <sup>+</sup> (1*2*3) | 2.32 | 2.66 | 3.26 | 3.17 | 3.25 | 2.66 | 2.89 | 1.74 | 1.74 | 169.7 | 360.5 |
| UO <sub>2</sub> L1H <sub>3</sub> <sup>+</sup> (133*)  | 2.82 | 3.18 | 3.27 | 2.43 | 2.55 | 2.90 | 2.86 | 1.74 | 1.74 | 173.3 | 360.5 |
| UO <sub>2</sub> L1H <sub>3</sub> <sup>+</sup> (232*)  | 2.58 | 3.67 | 3.60 | 2.45 | 2.44 | 2.62 | 2.89 | 1.75 | 1.74 | 174.8 | 360.2 |
| UO <sub>2</sub> L1H <sub>3</sub> <sup>+</sup> (131*)  | 2.66 | 2.42 | 2.42 | 2.78 | 3.82 | 3.52 | 2.94 | 1.74 | 1.74 | 171.9 | 360.5 |
| UO <sub>2</sub> L1H <sub>3</sub> <sup>+</sup> (132*)  | 2.68 | 2.87 | 3.01 | 2.51 | 2.99 | 2.85 | 2.82 | 1.73 | 1.74 | 177.2 | 360.0 |

(a) Arithmetic mean of the bond lengths in the equatorial plane of actinides;

(b) The sum of the bond angles in the equatorial plane of actinide atoms.

**Table S4.** Key geometrical parameters (bond length in Å, bond angle in degree) of UO<sub>2</sub><sup>2+</sup> and its complexes with H<sub>4</sub>L1 ligand in MeOH.

| U <sup>VI</sup>                                       | U-N <sub>i</sub> |      |      |      |      |      | $\bar{d}$ <sup>(a)</sup> | U-O <sup>yl</sup> |      |        | T <sub>A</sub> <sup>(b)</sup> |
|-------------------------------------------------------|------------------|------|------|------|------|------|--------------------------|-------------------|------|--------|-------------------------------|
|                                                       | N1               | N2   | N3   | N1*  | N2*  | N3*  |                          | O1                | O2   | ∠O-U-O |                               |
| UO <sub>2</sub> <sup>2+</sup>                         |                  |      |      |      |      |      |                          | 1.72              | 1.72 | 180.0  |                               |
| UO <sub>2</sub> L1 <sup>2-</sup>                      | 2.59             | 2.86 | 2.87 | 2.59 | 2.89 | 2.89 | 2.78                     | 1.76              | 1.76 | 179.4  | 361.1                         |
| UO <sub>2</sub> L1H <sup>-</sup> (1)                  | 3.45             | 3.33 | 2.72 | 2.39 | 2.56 | 2.88 | 2.89                     | 1.75              | 1.76 | 177.2  | 360.6                         |
| UO <sub>2</sub> L1H <sup>-</sup> (2)                  | 2.59             | 3.78 | 3.52 | 2.52 | 2.46 | 2.46 | 2.89                     | 1.76              | 1.76 | 176.9  | 360.1                         |
| UO <sub>2</sub> L1H <sub>2</sub> (23)                 | 2.56             | 3.86 | 3.85 | 2.53 | 2.41 | 2.40 | 2.93                     | 1.76              | 1.77 | 179.6  | 360.7                         |
| UO <sub>2</sub> L1H <sub>2</sub> (11*)                | 2.84             | 2.77 | 2.75 | 2.74 | 2.75 | 2.77 | 2.77                     | 1.75              | 1.75 | 176.4  | 364.3                         |
| UO <sub>2</sub> L1H <sub>2</sub> (13)                 | 3.02             | 3.88 | 3.80 | 2.47 | 2.38 | 2.46 | 3.00                     | 1.76              | 1.76 | 179.7  | 354.9                         |
| UO <sub>2</sub> L1H <sub>2</sub> (12)                 | 3.18             | 4.11 | 3.55 | 2.42 | 2.37 | 2.45 | 3.01                     | 1.76              | 1.76 | 178.3  | 356.2                         |
| UO <sub>2</sub> L1H <sub>2</sub> (2*3)                | 2.46             | 2.50 | 2.67 | 2.59 | 3.72 | 3.41 | 2.89                     | 1.75              | 1.75 | 176.6  | 359.3                         |
| UO <sub>2</sub> L1H <sub>2</sub> (22*)                | 2.49             | 3.31 | 3.66 | 2.54 | 2.53 | 2.76 | 2.88                     | 1.75              | 1.75 | 176.0  | 361.1                         |
| UO <sub>2</sub> L1H <sub>3</sub> <sup>+</sup> (1*23)  | 3.54             | 4.28 | 3.75 | 2.44 | 2.36 | 2.46 | 3.14                     | 1.76              | 1.77 | 179.1  | 343.3                         |
| UO <sub>2</sub> L1H <sub>3</sub> <sup>+</sup> (1*2*3) | 2.31             | 2.55 | 3.75 | 4.09 | 3.75 | 2.55 | 3.16                     | 1.75              | 1.76 | 178.2  | 344.1                         |
| UO <sub>2</sub> L1H <sub>3</sub> <sup>+</sup> (133*)  | 3.21             | 3.90 | 3.75 | 2.40 | 2.39 | 2.66 | 3.05                     | 1.75              | 1.75 | 175.5  | 354.3                         |
| UO <sub>2</sub> L1H <sub>3</sub> <sup>+</sup> (232*)  | 2.54             | 3.83 | 3.80 | 2.48 | 2.43 | 2.57 | 2.94                     | 1.76              | 1.75 | 175.0  | 360.8                         |
| UO <sub>2</sub> L1H <sub>3</sub> <sup>+</sup> (131*)  | 2.92             | 2.41 | 2.40 | 2.80 | 3.88 | 3.86 | 3.05                     | 1.75              | 1.75 | 176.6  | 352.7                         |
| UO <sub>2</sub> L1H <sub>3</sub> <sup>+</sup> (132*)  | 2.64             | 2.86 | 3.06 | 2.53 | 3.06 | 2.86 | 2.84                     | 1.74              | 1.74 | 175.4  | 359.2                         |

(a) Arithmetic mean of the bond lengths in the equatorial plane of actinides;

(b) The sum of the bond angles in the equatorial plane of actinide atoms.

**Table S5.** Key geometrical parameters (bond length in Å, bond angle in degree) of NpO<sub>2</sub><sup>2+</sup> and its complexes with H<sub>4</sub>L1 ligand in vacuum.

| Np <sup>VI</sup>                  | Np-N <sub>i</sub> |      |      |      |      |      | $\bar{d}$ <sup>(a)</sup> | Np-O <sup>yl</sup> |      |         | T <sub>A</sub> <sup>(b)</sup> |
|-----------------------------------|-------------------|------|------|------|------|------|--------------------------|--------------------|------|---------|-------------------------------|
|                                   | N1                | N2   | N3   | N1*  | N2*  | N3*  |                          | O1                 | O2   | ∠O-Np-O |                               |
| NpO <sub>2</sub> <sup>2+</sup>    |                   |      |      |      |      |      |                          | 1.66               | 1.66 | 180.0   |                               |
| NpO <sub>2</sub> L1 <sup>2-</sup> | 2.70              | 2.92 | 2.93 | 2.71 | 2.93 | 2.92 | 2.85                     | 1.79               | 1.79 | 179.8   | 360.3                         |

|                                                                   |      |      |      |      |      |      |      |      |      |       |       |
|-------------------------------------------------------------------|------|------|------|------|------|------|------|------|------|-------|-------|
| NpO <sub>2</sub> L1H <sup>-</sup> <sub>(1)</sub>                  | 3.18 | 3.03 | 2.78 | 2.55 | 2.78 | 3.03 | 2.89 | 1.78 | 1.79 | 174.8 | 360.0 |
| NpO <sub>2</sub> L1H <sup>-</sup> <sub>(2)</sub>                  | 2.70 | 3.49 | 3.24 | 2.59 | 2.62 | 2.62 | 2.88 | 1.80 | 1.78 | 173.8 | 360.2 |
| NpO <sub>2</sub> L1H <sub>2</sub> <sub>(23)</sub>                 | 2.61 | 3.48 | 3.49 | 2.63 | 2.55 | 2.55 | 2.88 | 1.79 | 1.79 | 168.6 | 360.4 |
| NpO <sub>2</sub> L1H <sub>2</sub> <sub>(11*)</sub>                | 2.91 | 2.81 | 2.81 | 2.91 | 2.96 | 2.96 | 2.89 | 1.77 | 1.77 | 179.1 | 360.6 |
| NpO <sub>2</sub> L1H <sub>2</sub> <sub>(13)</sub>                 | 2.94 | 3.51 | 3.50 | 2.58 | 2.52 | 2.60 | 2.94 | 1.77 | 1.79 | 174.6 | 356.2 |
| NpO <sub>2</sub> L1H <sub>2</sub> <sub>(12)</sub>                 | 3.08 | 3.75 | 3.28 | 2.49 | 2.49 | 2.59 | 2.95 | 1.76 | 1.79 | 174.7 | 356.6 |
| NpO <sub>2</sub> L1H <sub>2</sub> <sub>(2*3)</sub>                | 2.47 | 2.79 | 3.21 | 2.88 | 3.20 | 2.79 | 2.89 | 1.77 | 1.79 | 175.5 | 358.3 |
| NpO <sub>2</sub> L1H <sub>2</sub> <sub>(22*)</sub>                | 2.61 | 2.84 | 3.13 | 2.61 | 2.84 | 3.13 | 2.86 | 1.78 | 1.78 | 179.8 | 360.8 |
| NpO <sub>2</sub> L1H <sub>3</sub> <sup>+</sup> <sub>(1*23)</sub>  | 3.37 | 4.04 | 3.63 | 2.53 | 2.42 | 2.56 | 3.09 | 1.76 | 1.83 | 171.8 | 343.8 |
| NpO <sub>2</sub> L1H <sub>3</sub> <sup>+</sup> <sub>(1*2*3)</sub> | 2.45 | 2.76 | 3.18 | 3.06 | 3.18 | 2.76 | 2.90 | 1.76 | 1.77 | 174.4 | 360.1 |
| NpO <sub>2</sub> L1H <sub>3</sub> <sup>+</sup> <sub>(133*)</sub>  | 2.82 | 3.00 | 3.15 | 2.56 | 2.73 | 3.02 | 2.88 | 1.77 | 1.78 | 176.2 | 360.5 |
| NpO <sub>2</sub> L1H <sub>3</sub> <sup>+</sup> <sub>(232*)</sub>  | 2.65 | 3.39 | 3.34 | 2.55 | 2.58 | 2.79 | 2.88 | 1.78 | 1.77 | 174.5 | 360.1 |
| NpO <sub>2</sub> L1H <sub>3</sub> <sup>+</sup> <sub>(131*)</sub>  | 2.76 | 2.56 | 2.58 | 2.83 | 3.54 | 3.31 | 2.93 | 1.77 | 1.78 | 175.7 | 360.1 |
| NpO <sub>2</sub> L1H <sub>3</sub> <sup>+</sup> <sub>(132*)</sub>  | 2.71 | 2.82 | 2.98 | 2.68 | 3.19 | 2.97 | 2.89 | 1.75 | 1.77 | 179.6 | 356.9 |

<sup>(a)</sup> Arithmetic mean of the bond lengths in the equatorial plane of actinides;

<sup>(b)</sup> The sum of the bond angles in the equatorial plane of actinide atoms.

**Table S6.** Key geometrical parameters (bond length in Å, bond angle in degree) of NpO<sub>2</sub><sup>2+</sup> and its complexes with H<sub>4</sub>L1 ligand in MeOH.

| Np <sup>VI</sup>                                                  | Np-N <sub>i</sub> |      |      |      |      |      | $\bar{d}$ <sup>(a)</sup> | Np-O <sup>yl</sup> |      |         | T <sub>A</sub> <sup>(b)</sup> |
|-------------------------------------------------------------------|-------------------|------|------|------|------|------|--------------------------|--------------------|------|---------|-------------------------------|
|                                                                   | N1                | N2   | N3   | N1*  | N2*  | N3*  |                          | O1                 | O2   | ∠O-Np-O |                               |
| NpO <sub>2</sub> <sup>2+</sup>                                    |                   |      |      |      |      |      |                          | 1.70               | 1.70 | 180.0   |                               |
| NpO <sub>2</sub> L1 <sup>2-</sup>                                 | 2.66              | 2.91 | 2.92 | 2.66 | 2.91 | 2.90 | 2.83                     | 1.81               | 1.81 | 180.0   | 360.3                         |
| NpO <sub>2</sub> L1H <sup>-</sup> <sub>(1)</sub>                  | 3.21              | 2.99 | 2.72 | 2.52 | 2.79 | 3.10 | 2.89                     | 1.80               | 1.80 | 176.3   | 359.9                         |
| NpO <sub>2</sub> L1H <sup>-</sup> <sub>(2)</sub>                  | 2.68              | 3.57 | 3.30 | 2.57 | 2.57 | 2.57 | 2.88                     | 1.81               | 1.81 | 176.2   | 360.1                         |
| NpO <sub>2</sub> L1H <sub>2</sub> <sub>(23)</sub>                 | 2.60              | 3.53 | 3.56 | 2.61 | 2.52 | 2.52 | 2.89                     | 1.81               | 1.81 | 172.9   | 360.0                         |
| NpO <sub>2</sub> L1H <sub>2</sub> <sub>(11*)</sub>                | 2.89              | 2.74 | 2.74 | 2.88 | 3.05 | 3.05 | 2.89                     | 1.79               | 1.79 | 179.5   | 360.6                         |
| NpO <sub>2</sub> L1H <sub>2</sub> <sub>(13)</sub>                 | 3.24              | 3.86 | 3.60 | 2.54 | 2.46 | 2.57 | 3.04                     | 1.80               | 1.81 | 179.2   | 348.4                         |
| NpO <sub>2</sub> L1H <sub>2</sub> <sub>(12)</sub>                 | 3.35              | 3.95 | 3.47 | 2.49 | 2.45 | 2.58 | 3.05                     | 1.79               | 1.80 | 179.1   | 348.5                         |
| NpO <sub>2</sub> L1H <sub>2</sub> <sub>(2*3)</sub>                | 2.45              | 2.77 | 3.28 | 3.00 | 3.27 | 2.76 | 2.92                     | 1.79               | 1.80 | 178.8   | 356.3                         |
| NpO <sub>2</sub> L1H <sub>2</sub> <sub>(22*)</sub>                | 2.61              | 2.85 | 3.16 | 2.60 | 2.82 | 3.14 | 2.86                     | 1.80               | 1.80 | 179.7   | 360.9                         |
| NpO <sub>2</sub> L1H <sub>3</sub> <sup>+</sup> <sub>(1*23)</sub>  | 3.57              | 4.16 | 3.70 | 2.57 | 2.45 | 2.61 | 3.18                     | 1.79               | 1.84 | 178.7   | 335.6                         |
| NpO <sub>2</sub> L1H <sub>3</sub> <sup>+</sup> <sub>(1*2*3)</sub> | 2.41              | 2.63 | 3.78 | 4.06 | 3.78 | 2.63 | 3.22                     | 1.78               | 1.82 | 178.5   | 332.6                         |
| NpO <sub>2</sub> L1H <sub>3</sub> <sup>+</sup> <sub>(133*)</sub>  | 2.81              | 3.12 | 3.27 | 2.56 | 2.66 | 2.96 | 2.90                     | 1.79               | 1.79 | 177.7   | 360.4                         |
| NpO <sub>2</sub> L1H <sub>3</sub> <sup>+</sup> <sub>(232*)</sub>  | 2.63              | 3.55 | 3.48 | 2.54 | 2.53 | 2.76 | 2.92                     | 1.80               | 1.80 | 175.0   | 361.0                         |
| NpO <sub>2</sub> L1H <sub>3</sub> <sup>+</sup> <sub>(131*)</sub>  | 3.08              | 2.51 | 2.49 | 2.87 | 3.74 | 3.80 | 3.08                     | 1.79               | 1.80 | 178.6   | 348.3                         |
| NpO <sub>2</sub> L1H <sub>3</sub> <sup>+</sup> <sub>(132*)</sub>  | 3.27              | 2.60 | 2.61 | 2.56 | 3.63 | 3.87 | 3.09                     | 1.77               | 1.79 | 176.0   | 342.1                         |

<sup>(a)</sup> Arithmetic mean of the bond lengths in the equatorial plane of actinides;

<sup>(b)</sup> The sum of the bond angles in the equatorial plane of actinide atoms.

**Table S7.** Key geometrical parameters (bond length in Å, bond angle in degree) of PuO<sub>2</sub><sup>2+</sup> and its complexes with H<sub>4</sub>L1 ligand in vacuum.

| Pu <sup>VI</sup>                                                  | Pu-N <sub>i</sub> |      |      |      |      |      | $\bar{d}^{(a)}$ | Pu-O <sup>yl</sup> |      |         | T <sub>A</sub> <sup>(b)</sup> |
|-------------------------------------------------------------------|-------------------|------|------|------|------|------|-----------------|--------------------|------|---------|-------------------------------|
|                                                                   | N1                | N2   | N3   | N1*  | N2*  | N3*  |                 | O1                 | O2   | ∠O-Pu-O |                               |
| PuO <sub>2</sub> <sup>2+</sup>                                    |                   |      |      |      |      |      |                 | 1.64               | 1.64 | 180.0   |                               |
| PuO <sub>2</sub> L1 <sup>2-</sup>                                 | 2.70              | 2.93 | 2.92 | 2.68 | 2.92 | 2.93 | 2.85            | 1.77               | 1.77 | 179.9   | 360.3                         |
| PuO <sub>2</sub> L1H <sup>-</sup> <sub>(1)</sub>                  | 3.19              | 3.04 | 2.77 | 2.53 | 2.77 | 3.04 | 2.89            | 1.76               | 1.77 | 176.4   | 359.9                         |
| PuO <sub>2</sub> L1H <sup>-</sup> <sub>(2)</sub>                  | 2.69              | 3.51 | 3.25 | 2.58 | 2.60 | 2.61 | 2.88            | 1.77               | 1.76 | 176.1   | 360.1                         |
| PuO <sub>2</sub> L1H <sub>2</sub> <sub>(23)</sub>                 | 2.62              | 3.51 | 3.51 | 2.62 | 2.53 | 2.53 | 2.89            | 1.77               | 1.77 | 174.0   | 360.3                         |
| PuO <sub>2</sub> L1H <sub>2</sub> <sub>(11*)</sub>                | 2.91              | 2.97 | 2.97 | 2.91 | 2.80 | 2.80 | 2.89            | 1.75               | 1.75 | 179.3   | 360.5                         |
| PuO <sub>2</sub> L1H <sub>2</sub> <sub>(13)</sub>                 | 2.94              | 3.50 | 3.49 | 2.57 | 2.51 | 2.60 | 2.93            | 1.75               | 1.77 | 176.3   | 356.8                         |
| PuO <sub>2</sub> L1H <sub>2</sub> <sub>(12)</sub>                 | 3.02              | 3.74 | 3.30 | 2.48 | 2.49 | 2.58 | 2.93            | 1.75               | 1.77 | 175.7   | 357.6                         |
| PuO <sub>2</sub> L1H <sub>2</sub> <sub>(2*3)</sub>                | 2.47              | 2.80 | 3.18 | 2.81 | 3.18 | 2.80 | 2.87            | 1.75               | 1.77 | 177.1   | 358.8                         |
| PuO <sub>2</sub> L1H <sub>2</sub> <sub>(22*)</sub>                | 2.59              | 2.84 | 3.13 | 2.60 | 2.84 | 3.13 | 2.86            | 1.76               | 1.76 | 179.9   | 360.7                         |
| PuO <sub>2</sub> L1H <sub>3</sub> <sup>+</sup> <sub>(1*23)</sub>  | 3.33              | 4.01 | 3.61 | 2.53 | 2.41 | 2.54 | 3.07            | 1.74               | 1.80 | 174.5   | 346.3                         |
| PuO <sub>2</sub> L1H <sub>3</sub> <sup>+</sup> <sub>(1*2*3)</sub> | 2.42              | 2.74 | 3.23 | 3.13 | 3.23 | 2.74 | 2.91            | 1.76               | 1.78 | 174.2   | 359.6                         |
| PuO <sub>2</sub> L1H <sub>3</sub> <sup>+</sup> <sub>(133*)</sub>  | 2.80              | 3.04 | 3.19 | 2.55 | 2.70 | 3.00 | 2.88            | 1.75               | 1.76 | 177.3   | 360.4                         |
| PuO <sub>2</sub> L1H <sub>3</sub> <sup>+</sup> <sub>(232*)</sub>  | 2.64              | 3.39 | 3.34 | 2.54 | 2.57 | 2.79 | 2.88            | 1.76               | 1.75 | 176.8   | 360.1                         |
| PuO <sub>2</sub> L1H <sub>3</sub> <sup>+</sup> <sub>(131*)</sub>  | 2.74              | 2.57 | 2.59 | 2.82 | 3.51 | 3.27 | 2.92            | 1.75               | 1.76 | 177.0   | 360.2                         |
| PuO <sub>2</sub> L1H <sub>3</sub> <sup>+</sup> <sub>(132*)</sub>  | 2.71              | 2.89 | 3.09 | 2.67 | 3.09 | 2.89 | 2.89            | 1.74               | 1.76 | 179.8   | 357.0                         |

<sup>(a)</sup> Arithmetic mean of the bond lengths in the equatorial plane of actinides;

<sup>(b)</sup> The sum of the bond angles in the equatorial plane of actinide atoms.

**Table S8.** Key geometrical parameters (bond length in Å, bond angle in degree) of PuO<sub>2</sub><sup>2+</sup> and its complexes with H<sub>4</sub>L1 ligand in MeOH.

| Pu <sup>VI</sup>                                                  | Pu-N <sub>i</sub> |      |      |      |      |      | $\bar{d}^{(a)}$ | Pu-O <sup>yl</sup> |      |         | T <sub>A</sub> <sup>(b)</sup> |
|-------------------------------------------------------------------|-------------------|------|------|------|------|------|-----------------|--------------------|------|---------|-------------------------------|
|                                                                   | N1                | N2   | N3   | N1*  | N2*  | N3*  |                 | O1                 | O2   | ∠O-Pu-O |                               |
| PuO <sub>2</sub> <sup>2+</sup>                                    |                   |      |      |      |      |      |                 | 1.68               | 1.68 | 180.0   |                               |
| PuO <sub>2</sub> L1 <sup>2-</sup>                                 | 2.66              | 2.91 | 2.91 | 2.66 | 2.91 | 2.91 | 2.83            | 1.79               | 1.79 | 180.0   | 360.3                         |
| PuO <sub>2</sub> L1H <sup>-</sup> <sub>(1)</sub>                  | 3.20              | 3.05 | 2.75 | 2.51 | 2.75 | 3.05 | 2.89            | 1.78               | 1.78 | 177.3   | 359.9                         |
| PuO <sub>2</sub> L1H <sup>-</sup> <sub>(2)</sub>                  | 2.67              | 3.58 | 3.32 | 2.57 | 2.56 | 2.57 | 2.88            | 1.79               | 1.79 | 177.6   | 360.0                         |
| PuO <sub>2</sub> L1H <sub>2</sub> <sub>(23)</sub>                 | 2.62              | 3.70 | 3.61 | 2.60 | 2.48 | 2.48 | 2.91            | 1.79               | 1.79 | 178.4   | 360.2                         |
| PuO <sub>2</sub> L1H <sub>2</sub> <sub>(11*)</sub>                | 2.86              | 2.99 | 2.99 | 2.86 | 2.78 | 2.78 | 2.88            | 1.76               | 1.76 | 179.4   | 360.4                         |
| PuO <sub>2</sub> L1H <sub>2</sub> <sub>(13)</sub>                 | 3.20              | 3.81 | 3.57 | 2.53 | 2.46 | 2.57 | 3.02            | 1.77               | 1.79 | 179.4   | 350.6                         |
| PuO <sub>2</sub> L1H <sub>2</sub> <sub>(12)</sub>                 | 3.31              | 3.94 | 3.45 | 2.48 | 2.45 | 2.58 | 3.04            | 1.78               | 1.79 | 179.4   | 349.4                         |
| PuO <sub>2</sub> L1H <sub>2</sub> <sub>(2*3)</sub>                | 2.46              | 2.90 | 3.33 | 2.82 | 3.06 | 2.71 | 2.88            | 1.76               | 1.77 | 178.6   | 358.5                         |
| PuO <sub>2</sub> L1H <sub>2</sub> <sub>(22*)</sub>                | 2.58              | 2.81 | 3.13 | 2.59 | 2.87 | 3.16 | 2.86            | 1.77               | 1.77 | 179.8   | 360.8                         |
| PuO <sub>2</sub> L1H <sub>3</sub> <sup>+</sup> <sub>(1*23)</sub>  | 3.52              | 4.12 | 3.68 | 2.56 | 2.44 | 2.59 | 3.15            | 1.76               | 1.81 | 179.2   | 338.9                         |
| PuO <sub>2</sub> L1H <sub>3</sub> <sup>+</sup> <sub>(1*2*3)</sub> | 2.40              | 2.63 | 3.77 | 4.07 | 3.77 | 2.63 | 3.21            | 1.77               | 1.80 | 178.6   | 333.3                         |
| PuO <sub>2</sub> L1H <sub>3</sub> <sup>+</sup> <sub>(133*)</sub>  | 2.84              | 3.14 | 3.27 | 2.52 | 2.63 | 2.99 | 2.90            | 1.78               | 1.78 | 179.0   | 360.5                         |



|                                                                  |      |      |      |      |      |      |      |      |      |       |       |
|------------------------------------------------------------------|------|------|------|------|------|------|------|------|------|-------|-------|
| PuO <sub>2</sub> L1H <sub>3</sub> <sup>+</sup> <sub>(232*)</sub> | 2.64 | 3.67 | 3.55 | 2.53 | 2.48 | 2.67 | 2.92 | 1.78 | 1.77 | 179.2 | 360.8 |
| PuO <sub>2</sub> L1H <sub>3</sub> <sup>+</sup> <sub>(131*)</sub> | 2.85 | 2.52 | 2.51 | 2.81 | 3.65 | 3.56 | 2.98 | 1.76 | 1.77 | 178.4 | 355.6 |
| PuO <sub>2</sub> L1H <sub>3</sub> <sup>+</sup> <sub>(132*)</sub> | 3.19 | 2.58 | 2.60 | 2.55 | 3.61 | 3.83 | 3.06 | 1.74 | 1.76 | 177.3 | 345.0 |

(a) Arithmetic mean of the bond lengths in the equatorial plane of actinides;

(b) The sum of the bond angles in the equatorial plane of actinide atoms.

**Table S9.** Key geometrical parameters (bond length in Å, bond angle in degree) of NpO<sub>2</sub><sup>+</sup> and its complexes with H<sub>4</sub>L1 ligand in vacuum.

| Np <sup>V</sup>                                                 | Np-N <sub>i</sub> |      |      |      |      |      | $\bar{d}$ <sup>(a)</sup> | Np-O <sup>yl</sup> |      |         | T <sub>A</sub> <sup>(b)</sup> |
|-----------------------------------------------------------------|-------------------|------|------|------|------|------|--------------------------|--------------------|------|---------|-------------------------------|
|                                                                 | N1                | N2   | N3   | N1*  | N2*  | N3*  |                          | O1                 | O2   | ∠O-Np-O |                               |
| NpO <sub>2</sub> <sup>+</sup>                                   |                   |      |      |      |      |      |                          | 1.71               | 1.71 | 180.0   |                               |
| NpO <sub>2</sub> L1 <sup>3-</sup>                               | 2.72              | 2.95 | 2.95 | 2.72 | 2.95 | 2.95 | 2.87                     | 1.79               | 1.79 | 180.0   | 360.6                         |
| NpO <sub>2</sub> L1H <sub>2</sub> <sup>-</sup> <sub>(1)</sub>   | 3.26              | 3.08 | 2.78 | 2.53 | 2.78 | 3.08 | 2.92                     | 1.78               | 1.79 | 174.2   | 360.3                         |
| NpO <sub>2</sub> L1H <sub>2</sub> <sup>-</sup> <sub>(2)</sub>   | 2.71              | 3.58 | 3.33 | 2.61 | 2.60 | 2.60 | 2.91                     | 1.80               | 1.79 | 173.4   | 360.5                         |
| NpO <sub>2</sub> L1H <sub>2</sub> <sup>-</sup> <sub>(23)</sub>  | 2.62              | 3.58 | 3.59 | 2.67 | 2.52 | 2.51 | 2.92                     | 1.80               | 1.80 | 169.1   | 360.6                         |
| NpO <sub>2</sub> L1H <sub>2</sub> <sup>-</sup> <sub>(11*)</sub> | 2.98              | 2.90 | 2.90 | 2.98 | 2.90 | 2.90 | 2.93                     | 1.78               | 1.78 | 180.0   | 360.9                         |
| NpO <sub>2</sub> L1H <sub>2</sub> <sup>-</sup> <sub>(13)</sub>  | 3.02              | 3.64 | 3.58 | 2.57 | 2.49 | 2.57 | 2.98                     | 1.78               | 1.80 | 173.4   | 355.8                         |
| NpO <sub>2</sub> L1H <sub>2</sub> <sup>-</sup> <sub>(12)</sub>  | 3.10              | 3.83 | 3.37 | 2.49 | 2.47 | 2.57 | 2.97                     | 1.77               | 1.79 | 174.0   | 357.2                         |
| NpO <sub>2</sub> L1H <sub>2</sub> <sup>-</sup> <sub>(2*3)</sub> | 2.50              | 2.83 | 3.23 | 2.82 | 3.23 | 2.83 | 2.91                     | 1.78               | 1.79 | 176.8   | 358.9                         |
| NpO <sub>2</sub> L1H <sub>2</sub> <sup>-</sup> <sub>(22*)</sub> | 2.60              | 2.86 | 3.19 | 2.60 | 2.86 | 3.19 | 2.88                     | 1.79               | 1.79 | 180.0   | 361.3                         |
| NpO <sub>2</sub> L1H <sub>3</sub> <sub>(1*23)</sub>             | 3.43              | 4.08 | 3.65 | 2.55 | 2.41 | 2.53 | 3.11                     | 1.77               | 1.83 | 170.0   | 345.0                         |
| NpO <sub>2</sub> L1H <sub>3</sub> <sub>(1*2*3)</sub>            | 2.42              | 2.75 | 3.28 | 3.19 | 3.25 | 2.73 | 2.94                     | 1.77               | 1.79 | 171.7   | 360.4                         |
| NpO <sub>2</sub> L1H <sub>3</sub> <sub>(133*)</sub>             | 2.89              | 3.14 | 3.25 | 2.51 | 2.65 | 3.02 | 2.91                     | 1.78               | 1.78 | 174.6   | 360.8                         |
| NpO <sub>2</sub> L1H <sub>3</sub> <sub>(232*)</sub>             | 2.67              | 3.52 | 3.43 | 2.53 | 2.55 | 2.77 | 2.91                     | 1.79               | 1.78 | 174.5   | 360.4                         |
| NpO <sub>2</sub> L1H <sub>3</sub> <sub>(131*)</sub>             | 2.79              | 2.50 | 2.51 | 2.83 | 3.69 | 3.48 | 2.97                     | 1.78               | 1.79 | 172.6   | 360.4                         |
| NpO <sub>2</sub> L1H <sub>3</sub> <sub>(132*)</sub>             | 2.76              | 2.63 | 2.75 | 2.65 | 3.45 | 3.30 | 2.92                     | 1.75               | 1.78 | 178.2   | 356.0                         |

(a) Arithmetic mean of the bond lengths in the equatorial plane of actinides;

(b) The sum of the bond angles in the equatorial plane of actinide atoms.

**Table S10.** Key geometrical parameters (bond length in Å, bond angle in degree) of NpO<sub>2</sub><sup>+</sup> and its complexes with H<sub>4</sub>L1 ligand in MeOH.

| Np <sup>V</sup>                                                 | Np-N <sub>i</sub> |      |      |      |      |      | $\bar{d}$ <sup>(a)</sup> | Np-O <sup>yl</sup> |      |         | T <sub>A</sub> <sup>(b)</sup> |
|-----------------------------------------------------------------|-------------------|------|------|------|------|------|--------------------------|--------------------|------|---------|-------------------------------|
|                                                                 | N1                | N2   | N3   | N1*  | N2*  | N3*  |                          | O1                 | O2   | ∠O-Np-O |                               |
| NpO <sub>2</sub> <sup>+</sup>                                   |                   |      |      |      |      |      |                          | 1.76               | 1.76 | 180.0   |                               |
| NpO <sub>2</sub> L1 <sup>3-</sup>                               | 2.68              | 3.04 | 3.04 | 2.68 | 2.85 | 2.85 | 2.85                     | 1.81               | 1.81 | 179.5   | 360.7                         |
| NpO <sub>2</sub> L1H <sub>2</sub> <sup>-</sup> <sub>(1)</sub>   | 3.25              | 3.08 | 2.76 | 2.51 | 2.76 | 3.07 | 2.90                     | 1.80               | 1.81 | 175.7   | 360.4                         |
| NpO <sub>2</sub> L1H <sub>2</sub> <sup>-</sup> <sub>(2)</sub>   | 2.67              | 3.68 | 3.42 | 2.58 | 2.54 | 2.54 | 2.91                     | 1.82               | 1.82 | 175.8   | 360.6                         |
| NpO <sub>2</sub> L1H <sub>2</sub> <sup>-</sup> <sub>(23)</sub>  | 2.61              | 3.76 | 3.70 | 2.63 | 2.47 | 2.47 | 2.94                     | 1.82               | 1.82 | 176.4   | 360.5                         |
| NpO <sub>2</sub> L1H <sub>2</sub> <sup>-</sup> <sub>(11*)</sub> | 2.89              | 2.90 | 2.90 | 2.89 | 2.90 | 2.90 | 2.90                     | 1.79               | 1.79 | 180.0   | 360.7                         |
| NpO <sub>2</sub> L1H <sub>2</sub> <sup>-</sup> <sub>(13)</sub>  | 3.25              | 3.91 | 3.66 | 2.53 | 2.44 | 2.54 | 3.06                     | 1.81               | 1.82 | 177.8   | 351.6                         |

|                                                      |      |      |      |      |      |      |      |      |      |       |       |
|------------------------------------------------------|------|------|------|------|------|------|------|------|------|-------|-------|
| NpO <sub>2</sub> L1H <sub>2</sub> <sup>-(12)</sup>   | 3.35 | 3.97 | 3.47 | 2.49 | 2.45 | 2.57 | 3.05 | 1.80 | 1.81 | 178.1 | 351.4 |
| NpO <sub>2</sub> L1H <sub>2</sub> <sup>-(2*3)</sup>  | 2.49 | 2.97 | 3.37 | 2.75 | 3.03 | 2.73 | 2.89 | 1.80 | 1.81 | 178.0 | 359.4 |
| NpO <sub>2</sub> L1H <sub>2</sub> <sup>-(22*)</sup>  | 2.60 | 2.86 | 3.18 | 2.60 | 2.86 | 3.18 | 2.88 | 1.80 | 1.80 | 180.0 | 361.3 |
| NpO <sub>2</sub> L1H <sub>3</sub> <sup>(1*23)</sup>  | 3.59 | 4.17 | 3.69 | 2.55 | 2.45 | 2.58 | 3.17 | 1.79 | 1.84 | 177.1 | 339.1 |
| NpO <sub>2</sub> L1H <sub>3</sub> <sup>(1*2*3)</sup> | 2.40 | 2.63 | 3.72 | 4.06 | 3.71 | 2.61 | 3.19 | 1.79 | 1.82 | 178.2 | 342.1 |
| NpO <sub>2</sub> L1H <sub>3</sub> <sup>(133*)</sup>  | 2.88 | 3.35 | 3.39 | 2.50 | 2.57 | 2.90 | 2.93 | 1.78 | 1.79 | 177.9 | 360.7 |
| NpO <sub>2</sub> L1H <sub>3</sub> <sup>(232*)</sup>  | 2.64 | 3.71 | 3.61 | 2.54 | 2.50 | 2.68 | 2.94 | 1.81 | 1.80 | 179.3 | 361.2 |
| NpO <sub>2</sub> L1H <sub>3</sub> <sup>(131*)</sup>  | 2.93 | 2.49 | 2.47 | 2.79 | 3.73 | 3.69 | 3.02 | 1.80 | 1.80 | 175.7 | 357.1 |
| NpO <sub>2</sub> L1H <sub>3</sub> <sup>(132*)</sup>  | 3.28 | 2.63 | 2.62 | 2.51 | 3.62 | 3.88 | 3.09 | 1.78 | 1.79 | 177.6 | 345.0 |

(a) Arithmetic mean of the bond lengths in the equatorial plane of actinides;

(b) The sum of the bond angles in the equatorial plane of actinide atoms.

## 5. The population analysis of the complexes in methanol.

**Table S11.** The Mulliken atomic charges ( $q$ ) and the Mulliken atomic spin densities ( $s$ ) of key atoms and groups, and the Mayer atomic bond orders of the complexes AnO<sub>2</sub>L1<sup>2-/3-</sup>, AnO<sub>2</sub>L2<sup>0/-</sup>, and AnO<sub>2</sub>L3<sup>-2/-</sup> in methanol.

|                  | $q^{(a)}$                             |                |                   | $s^{(a)}$    |                                        |              | MBO <sup>(b)</sup>                 |                       |
|------------------|---------------------------------------|----------------|-------------------|--------------|----------------------------------------|--------------|------------------------------------|-----------------------|
|                  | Actinyl                               | N <sub>i</sub> |                   | Actinyl      | An-O <sup>yl</sup>                     |              | An-N <sub>i</sub>                  |                       |
|                  | An/O <sup>yl1</sup> /O <sup>yl2</sup> | $Q_A^{tot}$    | N1/N2/N3*(O3)     | $Q_N^{tot}$  | An/ O <sup>yl1</sup> /O <sup>yl2</sup> | $s^{tot}$    | O <sup>yl1</sup> /O <sup>yl2</sup> |                       |
| L1 <sup>4-</sup> |                                       |                |                   | <b>-3.66</b> |                                        |              |                                    |                       |
| U <sup>VI</sup>  | 2.55/-0.73/-0.76                      | <b>1.05</b>    | -0.78/-0.64/-0.64 | <b>-4.07</b> | -                                      | -            | 1.21/1.19                          | 0.22/0.25/0.26        |
| Np <sup>VI</sup> | 2.43/-0.95/-0.95                      | <b>0.53</b>    | -0.69/-0.60/-0.61 | <b>-3.81</b> | 2.21/-0.09/-0.09                       | <b>2.03</b>  | 0.97/0.97                          | 0.18/0.21/0.20        |
| Pu <sup>VI</sup> | 2.34/-0.90/-0.90                      | <b>0.55</b>    | -0.69/-0.60/-0.60 | <b>-3.77</b> | 3.37/-0.16/-0.16                       | <b>3.04</b>  | 0.94/0.94                          | 0.20/0.21/0.21        |
| U <sup>V</sup>   | 2.55/-1.06/-1.06                      | <b>0.43</b>    | -0.76/-0.65/-0.63 | <b>-4.06</b> | 1.12/-0.05/-0.05                       | <b>1.02</b>  | 0.99/0.99                          | <u>0.15/0.17/0.16</u> |
| Np <sup>V</sup>  | 2.38/-0.97/-0.96                      | <b>0.45</b>    | -0.74/-0.62/-0.61 | <b>-4.00</b> | 2.22/-0.10/-0.10                       | <b>2.03</b>  | 0.99/0.99                          | <u>0.20/0.18/0.21</u> |
| Pu <sup>V</sup>  | 2.29/-0.90/-0.90                      | <b>0.50</b>    | -0.73/-0.59/-0.69 | <b>-4.03</b> | 3.35/-0.17/-0.17                       | <b>3.02</b>  | 1.03/1.03                          | <u>0.21/0.14/0.21</u> |
| L2 <sup>2-</sup> |                                       |                |                   | <b>-2.65</b> |                                        |              |                                    |                       |
| U <sup>VI</sup>  | 2.57/-0.62/-0.62                      | <b>1.33</b>    | -0.74/-0.79/-0.52 | <b>-3.57</b> | -                                      | -            | 1.45/1.45                          | 0.19/0.23/0.15        |
| Np <sup>VI</sup> | 2.37/-0.85/-0.85                      | <b>0.67</b>    | -0.65/-0.68/-0.45 | <b>-3.08</b> | 2.21/-0.09/-0.09                       | <b>2.03</b>  | 1.27/1.27                          | 0.13/0.13/0.08        |
| Pu <sup>VI</sup> | 2.21/-0.78/-0.79                      | <b>0.64</b>    | -0.64/-0.66/-0.44 | <b>-3.00</b> | 3.37/-0.16/-0.16                       | <b>3.04</b>  | 1.32/1.32                          | 0.15/0.16/0.09        |
| U <sup>V</sup>   | 2.56/-0.66/-0.66                      | <b>1.24</b>    | -0.80/-0.83/-0.53 | <b>-3.80</b> | -0.01/0.00/0.00                        | <b>-0.01</b> | 1.40/1.40                          | 0.21/0.27/0.14        |
| Np <sup>V</sup>  | 2.38/-0.88/-0.89                      | <b>0.62</b>    | -0.68/-0.73/-0.50 | <b>-3.31</b> | 2.21/-0.09/-0.09                       | <b>2.03</b>  | 1.22/1.22                          | 0.15/0.16/0.09        |
| Pu <sup>V</sup>  | 2.23/-0.81/-0.82                      | <b>0.60</b>    | -0.66/-0.71/-0.49 | <b>-3.23</b> | 3.37/-0.16/-0.16                       | <b>3.04</b>  | 1.27/1.27                          | 0.17/0.18/0.09        |
| L3 <sup>3-</sup> |                                       |                |                   | <b>-3.30</b> |                                        |              |                                    |                       |
| U <sup>VI</sup>  | 2.70/-0.75/-0.78                      | <b>1.17</b>    | -0.68/-0.75/-0.61 | <b>-4.09</b> | -                                      | -            | 1.17/1.16                          | 0.28/0.23/0.18        |

|                  |                  |             |                   |              |                  |             |           |                |
|------------------|------------------|-------------|-------------------|--------------|------------------|-------------|-----------|----------------|
| Np <sup>VI</sup> | 2.58/-0.97/-0.97 | <b>0.65</b> | -0.62/-0.69/-0.56 | <b>-3.74</b> | 2.22/-0.09/-0.10 | <b>2.03</b> | 1.26/1.24 | 0.18/0.12/0.15 |
| Pu <sup>VI</sup> | 2.26/-0.55/-0.60 | <b>1.11</b> | -0.64/-0.71/-0.59 | <b>-3.88</b> | 2.35/-0.13/-0.12 | <b>2.10</b> | 0.95/0.94 | 0.20/0.14/0.15 |
| U <sup>V</sup>   | 2.71/-0.80/-0.85 | <b>1.07</b> | -0.80/-0.77/-0.61 | <b>-4.36</b> | 0.16/-0.01/0.00  | <b>0.15</b> | 1.12/1.10 | 0.30/0.23/0.17 |
| Np <sup>V</sup>  | 2.56/-1.00/-1.01 | <b>0.55</b> | -0.66/-0.72/-0.59 | <b>-3.95</b> | 2.22/-0.09/-0.10 | <b>2.03</b> | 0.91/0.88 | 0.22/0.17/0.16 |
| Pu <sup>V</sup>  | 2.46/-0.93/-0.97 | <b>0.55</b> | 0.65/-0.71/-0.59  | <b>-3.89</b> | 3.37/-0.16/-0.16 | <b>3.05</b> | 0.90/0.81 | 0.24/0.19/0.17 |

(a) The atomic charge  $q$  and spin density  $s$  are given in the format of An/O<sup>y</sup>1/O<sup>y</sup>2 for actinyl, and N1/N2/N3\*(O3) for the coordinating atoms in the first coordination shell. The values at the equivalent positions of N1\*/N2\*/N3 are not shown for simplicity. The group charge and group spin density were calculated as: for actinyl,  $Q_A^{tot} = q_{An} + q_{O1} + q_{O2}$ ; for

ligands L1<sup>4-</sup> and L3<sup>3-</sup>,  $Q_N^{tot} = \sum_{i=1}^6 (qN)_i$ ; for ligand L2<sup>2-</sup>,  $Q_N^{tot} = q_{N1} + q_{N2} + q_{N1*} + q_{N2*} + q_{O3}$ ; for AnO<sub>2</sub>L1<sup>2-/3-</sup> and AnO<sub>2</sub>L3<sup>-2-</sup>,  $Q_N^{tot} = q_{N1} + q_{N2} + q_{N3} + q_{N1*} + q_{N2*} + q_{N3*}$ ; for AnO<sub>2</sub>L2<sup>0/-</sup>,  $Q_N^{tot} = q_{N1} + q_{N2} + q_{N1*} + q_{N2*} + q_{O3}$ .

(b) MBO is given in the format of An-O<sup>y</sup>1/An-O<sup>y</sup>2, and An-N1/An-N2/An-N3\* for the bonds between actinides and ligands. The values for the equivalent bonds of An-N1\*/N2\*/N3 are not shown for simplicity.

(c) For the complexes with L2<sup>2-</sup> ligand, the values are given in the format of N1/N2/O3.

**Table S12.** The natural charges ( $q'$ ) and the spin densities ( $s'$ ) of key atoms and groups, and the Wiberg bond index (WBI) of the complexes AnO<sub>2</sub>L1<sup>2-/3-</sup>, AnO<sub>2</sub>L2<sup>0/-</sup>, and AnO<sub>2</sub>L3<sup>-2-</sup> in methanol.

|                  | $q'^{(a)}$                           |              |                   |              | $s'^{(a)}$                           |              | WBI <sup>(b)</sup>                |                       |
|------------------|--------------------------------------|--------------|-------------------|--------------|--------------------------------------|--------------|-----------------------------------|-----------------------|
|                  | Actinyl                              |              | N <sub>i</sub>    |              | Actinyl                              | $s^{tot}$    | An-O <sup>y</sup> 1               | An-N <sub>i</sub>     |
|                  | An/O <sup>y</sup> 1/O <sup>y</sup> 2 | $Q_A^{tot}$  | N1/N2/N3*(O3)     | $Q_N^{tot}$  | An/O <sup>y</sup> 1/O <sup>y</sup> 2 |              | O <sup>y</sup> 1/O <sup>y</sup> 2 |                       |
| L1 <sup>4-</sup> |                                      |              |                   | <b>-3.58</b> |                                      |              |                                   |                       |
| U <sup>VI</sup>  | 1.62/-0.58/-0.59                     | <b>0.45</b>  | -0.56/-0.54/-0.54 | <b>-3.26</b> | -                                    | -            | 2.13/2.13                         | 0.47/0.35/0.34        |
| Np <sup>VI</sup> | 1.33/-0.71/-0.71                     | <b>-0.09</b> | -0.54/-0.54/-0.54 | <b>-3.23</b> | 2.18/-0.09/-0.09                     | <b>2.00</b>  | 1.95/1.95                         | 0.36/0.29/0.29        |
| Pu <sup>VI</sup> | 1.27/-0.65/-0.65                     | <b>-0.03</b> | -0.55/-0.54/-0.53 | <b>-3.23</b> | 3.32/-0.16/-0.16                     | <b>3.00</b>  | 1.96/1.96                         | 0.34/0.27/0.27        |
| U <sup>V</sup>   | 1.45/-0.82/-0.82                     | <b>-0.18</b> | -0.56/-0.54/-0.54 | <b>-3.28</b> | 1.05/-0.04/-0.04                     | <b>0.97</b>  | 1.88/1.88                         | <u>0.39/0.28/0.32</u> |
| Np <sup>V</sup>  | 1.36/-0.73/-0.73                     | <b>-0.09</b> | -0.57/-0.54/-0.55 | <b>-3.31</b> | 2.17/-0.09/-0.09                     | <b>1.99</b>  | 1.93/1.93                         | <u>0.36/0.25/0.31</u> |
| Pu <sup>V</sup>  | 1.37/-0.66/-0.67                     | <b>0.04</b>  | -0.58/-0.54/-0.55 | <b>-3.39</b> | 3.27/-0.15/-0.15                     | <b>2.97</b>  | 1.95/1.95                         | <u>0.33/0.16/0.32</u> |
| L2 <sup>2-</sup> |                                      |              | (c)               | <b>-2.78</b> |                                      |              |                                   | (c)                   |
| U <sup>VI</sup>  | 1.69/-0.55/-0.55                     | <b>0.59</b>  | -0.57/-0.56/-0.49 | <b>-2.75</b> | -                                    | -            | 2.15/2.15                         | 0.48/0.52/0.27        |
| Np <sup>VI</sup> | 1.39/-0.67/-0.67                     | <b>0.05</b>  | -0.55/-0.53/-0.47 | <b>-2.63</b> | 2.15/-0.09/-0.09                     | <b>1.97</b>  | 1.99/1.99                         | 0.35/0.38/0.19        |
| Pu <sup>VI</sup> | 1.29/-0.60/-0.60                     | <b>0.08</b>  | -0.54/-0.52/-0.47 | <b>-2.61</b> | 3.29/-0.16/-0.16                     | <b>2.97</b>  | 2.01/2.01                         | 0.34/0.37/0.19        |
| U <sup>V</sup>   | 1.64/-0.57/-0.57                     | <b>0.49</b>  | -0.60/-0.57/-0.48 | <b>-2.84</b> | -0.01/0.00/0.00                      | <b>-0.01</b> | 2.13/2.13                         | 0.51/0.54/0.27        |

|                  |                  |              |                   |              |                  |             |           |                |
|------------------|------------------|--------------|-------------------|--------------|------------------|-------------|-----------|----------------|
| Np <sup>V</sup>  | 1.40/-0.69/-0.69 | <b>0.01</b>  | -0.56/-0.55/-0.50 | <b>-2.73</b> | 2.14/-0.09/-0.09 | <b>1.96</b> | 1.97/1.97 | 0.35/0.39/0.20 |
| Pu <sup>V</sup>  | 1.31/-0.63/-0.63 | <b>0.05</b>  | -0.56/-0.55/-0.50 | <b>-2.71</b> | 3.29/-0.16/-0.16 | <b>2.97</b> | 1.99/1.99 | 0.34/0.38/0.19 |
| L3 <sup>3-</sup> | <b>-3.41</b>     |              |                   |              |                  |             |           |                |
| U <sup>VI</sup>  | 1.46/-0.57/-0.57 | <b>0.32</b>  | -0.52/-0.52/-0.50 | <b>-3.08</b> | -                | -           | 2.13/2.13 | 0.46/0.52/0.37 |
| Np <sup>VI</sup> | 1.21/-0.69/-0.69 | <b>-0.17</b> | -0.54/-0.51/-0.48 | <b>-3.04</b> | 2.14/-0.08/-0.08 | <b>1.98</b> | 1.98/1.98 | 0.34/0.39/0.27 |
| Pu <sup>VI</sup> | 1.17/-0.38/-0.39 | <b>0.40</b>  | -0.52/-0.51/-0.50 | <b>-3.06</b> | 2.30/-0.15/-0.15 | <b>2.00</b> | 2.18/2.17 | 0.42/0.51/0.34 |
| U <sup>V</sup>   | 1.44/-0.61/-0.62 | <b>0.20</b>  | -0.56/-0.53/-0.52 | <b>-3.23</b> | 0.17/-0.01/-0.01 | <b>0.15</b> | 2.09/2.09 | 0.51/0.51/0.31 |
| Np <sup>V</sup>  | 1.22/-0.71/-0.71 | <b>-0.20</b> | -0.52/-0.53/-0.51 | <b>-3.13</b> | 2.14/-0.08/-0.08 | <b>1.98</b> | 1.97/1.96 | 0.35/0.39/0.26 |
| Pu <sup>V</sup>  | 1.14/-0.64/-0.65 | <b>-0.15</b> | -0.52/-0.53/-0.51 | <b>-3.12</b> | 3.32/-0.16/-0.16 | <b>3.00</b> | 1.98/1.97 | 0.33/0.38/0.26 |

(a) The atomic charge  $q$  and spin density  $s$  are given in the format of An/O<sup>y</sup>1/O<sup>y</sup>2 for actinyl, and N1/N2/N3\*(O3) for the coordinating atoms in the first coordination shell. The values at the equivalent positions of N1\*/N2\*/N3 are not shown for simplicity. The group charge and group spin density were calculated as: for actinyl,  $Q_A^{tot} = q_{An} + q_{O1} + q_{O2}$ ; for

ligands L1<sup>+</sup> and L3<sup>3-</sup>,  $Q_N^{tot} = \sum_{i=1}^6 (qN)_i$ ; for ligand L2<sup>2-</sup>,  $Q_N^{tot} = q_{N1} + q_{N2} + q_{N1*} + q_{N2*} + q_{O3}$ ; for AnO<sub>2</sub>L1<sup>2-/3-</sup> and AnO<sub>2</sub>L3<sup>-2-</sup>,  $Q_N^{tot} = q_{N1} + q_{N2} + q_{N3} + q_{N1*} + q_{N2*} + q_{N3*}$ ; for AnO<sub>2</sub>L2<sup>0/-</sup>,  $Q_N^{tot} = q_{N1} + q_{N2} + q_{N1*} + q_{N2*} + q_{O3}$ .

(b) WBI is given in the format of An-O<sup>y</sup>1/An-O<sup>y</sup>2, and An-N1/An-N2/An-N3\* for the bonds between actinides and ligands. The values for the equivalent bonds of An-N1\*/N2\*/N3 are not shown for simplicity.

(c) For the complexes with L2<sup>2-</sup> ligand, the values are given in the format of N1/N2/O3.

**Table S13.** The atomic natural charges ( $q'$ ) and the spin densities ( $s$ ) of key atoms and groups, and the Wiberg bond index (WBI) of the complexes AnO<sub>2</sub>H<sub>2</sub>L1<sup>2-/3-</sup> in methanol.

|                                 | $q'(a)$                              |             |                                         |              | $s(a)$                               |             | WBI <sup>(b)</sup>                |                                   |
|---------------------------------|--------------------------------------|-------------|-----------------------------------------|--------------|--------------------------------------|-------------|-----------------------------------|-----------------------------------|
|                                 | Actinyl                              |             | N <sub>i</sub>                          |              | Actinyl                              |             | An-O <sup>y</sup> 1               | An-N <sub>i</sub>                 |
|                                 | An/O <sup>y</sup> 1/O <sup>y</sup> 2 | $Q_A^{tot}$ | N1/N2/N3/<br>N1*/N2*/N3*                | $Q_N^{tot}$  | An/O <sup>y</sup> 1/O <sup>y</sup> 2 | $s^{tot}$   | O <sup>y</sup> 1/O <sup>y</sup> 2 | N1/N2/N3/<br>N1*/N2*/N3*          |
| H <sub>2</sub> L1 <sup>2-</sup> | <b>-3.40</b>                         |             |                                         |              |                                      |             |                                   |                                   |
| U <sup>VI</sup>                 | 2.07/-0.59/-0.60                     | <b>0.89</b> | -0.57/-0.55/-0.52/<br>-0.60/-0.60/-0.60 | <b>-3.44</b> | -                                    | -           | 2.10/2.08                         | 0.13/0.06/0.02/<br>0.51/0.53/0.50 |
| Np <sup>VI</sup>                | 1.77/-0.70/-0.74                     | <b>0.33</b> | -0.53/-0.55/-0.53/<br>-0.59/-0.60/-0.59 | <b>-3.38</b> | 2.15/-0.09/-0.09                     | <b>1.97</b> | 1.95/1.86                         | 0.04/0.05/0.02/<br>0.35/0.38/0.34 |
| Pu <sup>VI</sup>                | 1.64/-0.63/-0.67                     | <b>0.34</b> | -0.54/-0.54/-0.52/<br>-0.58/-0.58/-0.58 | <b>-3.36</b> | 3.29/-0.15/-0.14                     | <b>3.00</b> | 1.97/1.88                         | 0.05/0.05/0.02/<br>0.34/0.38/0.33 |
| U <sup>V</sup>                  | 1.91/-0.81/-0.84                     | <b>0.25</b> | -0.54/-0.55/-0.53/<br>-0.60/-0.60/-0.59 | <b>-3.41</b> | 1.07/-0.04/-0.04                     | <b>0.99</b> | 1.87/1.78                         | 0.04/0.05/0.02/<br>0.40/0.41/0.38 |
| Np <sup>V</sup>                 | 1.73/-0.71/-0.74                     | <b>0.28</b> | -0.54/-0.55/-0.53/<br>-0.59/-0.60/-0.59 | <b>-3.43</b> | 2.14/-0.09/-0.08                     | <b>1.97</b> | 1.94/1.86                         | 0.04/0.05/0.02/<br>0.35/0.38/0.34 |

|                 |                  |             |                                         |              |                  |             |           |                                   |
|-----------------|------------------|-------------|-----------------------------------------|--------------|------------------|-------------|-----------|-----------------------------------|
|                 |                  |             | -0.61/-0.61/-0.59                       |              |                  |             |           | 0.37/0.38/0.37                    |
| Pu <sup>V</sup> | 1.61/-0.64/-0.67 | <b>0.30</b> | -0.54/-0.55/-0.53/<br>-0.60/-0.60/-0.59 | <b>-3.42</b> | 3.28/-0.15/-0.15 | <b>2.98</b> | 1.96/1.89 | 0.05/0.05/0.02/<br>0.36/0.36/0.36 |

## 6. The four quantities in the framework of AIM technique in the complexes

**Table S14.** The three quantities in the framework of AIM technique in the complexes of AnO<sub>2</sub>H<sub>2</sub>L1<sup>0/-</sup>, AnO<sub>2</sub>L2<sup>0/-</sup>, AnO<sub>2</sub>L3<sup>-2/-</sup> and AnO<sub>2</sub>L1<sup>2-/3-</sup> in vacuum. The data are given in the format of U(VI)/Np(VI)/Pu(VI)/U(V)/Np(V)/Pu(V).

|                                                                  | $\rho_b$                                   | $\nabla^2\rho_b$                           | $H_b(r)$                                         |
|------------------------------------------------------------------|--------------------------------------------|--------------------------------------------|--------------------------------------------------|
| <b>AnO<sub>2</sub>H<sub>2</sub>L1<sub>13</sub><sup>0/-</sup></b> |                                            |                                            |                                                  |
| An-N1                                                            | 0.031/0.020/0.020/0.018/0.018/-            | 0.088/0.078/0.076/0.069/0.070/-            | -0.001/0.001/0.001/0.001/0.001/-                 |
| An-N2 <sup>(b)</sup>                                             | 0.006/0.008/0.007/-/-/-                    | 0.019/0.024/0.024/-/-/-                    | 0.001/0.001/0.001/-/-/-                          |
| An-N3 <sup>(b)</sup>                                             | -/-/-/-/-                                  | -/-/-/-/-                                  | -/-/-/-/-                                        |
| An-N1*                                                           | 0.065/0.048/0.048/0.052/0.050/0.050        | 0.157/0.152/0.154/0.149/0.153/0.157        | -0.011/-0.004/-0.004/-0.005/-0.005/-0.005        |
| An-N2*                                                           | 0.077/0.055/0.053/0.059/0.059/0.061        | 0.180/0.170/0.175/0.169/0.179/0.185        | -0.016/-0.006/-0.005/-0.007/-0.007/-0.008        |
| An-N3*                                                           | 0.067/0.047/0.045/0.049/0.050/0.050        | 0.158/0.147/0.147/0.144/0.151/0.156        | -0.012/-0.004/-0.003/-0.005/-0.004/-0.005        |
| <b>An-O<sup>VI</sup>1</b>                                        | <b>0.331/0.302/0.312/0.283/0.295/0.307</b> | <b>0.152/0.171/0.189/0.178/0.184/0.201</b> | <b>-0.336/-0.276/-0.284/-0.253/-0.264/-0.274</b> |
| <b>An-O<sup>VI</sup>2</b>                                        | <b>0.323/0.285/0.295/0.261/0.280/0.291</b> | <b>0.169/0.206/0.221/0.226/0.215/0.228</b> | <b>-0.322/-0.248/-0.256/-0.217/-0.239/-0.248</b> |
| <b>AnO<sub>2</sub>L2<sup>0/-</sup>(a)</b>                        |                                            |                                            |                                                  |
| An-O3                                                            | 0.031/0.028/0.027/0.029/0.025/0.024        | 0.120/0.115/0.114/0.112/0.103/0.101        | 0.001/0.001/0.002/0.001/0.001/0.002              |
| An-N1                                                            | 0.053/0.042/0.040/0.054/0.039/0.038        | 0.138/0.136/0.134/0.138/0.124/0.121        | -0.006/-0.002/-0.002/-0.006/-0.002/-0.001        |
| An-N2                                                            | 0.065/0.048/0.047/0.066/0.047/0.047        | 0.165/0.167/0.166/0.163/0.161/0.161        | -0.011/-0.003/-0.003/-0.011/-0.003/-0.003        |
| <b>An-O<sup>VI</sup>1</b>                                        | <b>0.327/0.291/0.303/0.323/0.287/0.298</b> | <b>0.168/0.202/0.210/0.173/0.210/0.217</b> | <b>-0.329/-0.257/-0.268/-0.320/-0.249-0.260</b>  |
| <b>AnO<sub>2</sub>L3<sup>-2/-</sup>(a)</b>                       |                                            |                                            |                                                  |
| An-N1                                                            | 0.043/0.032/0.040/0.052/0.033/0.031        | 0.113/0.109/0.116/0.129/0.110/0.108        | -0.003/0.000/-0.002/-0.006/0.000/0.000           |
| An-N2                                                            | 0.057/0.046/0.056/0.055/0.044/0.043        | 0.148/0.150/0.157/0.143/0.143/0.148        | -0.007/-0.003/-0.007/-0.006/-0.002/-0.002        |
| An-N3                                                            | 0.030/0.024/0.028/0.022/0.021/0.020        | 0.086/0.084/0.086/0.064/0.072/0.073        | -0.001/0.001/0.000/0.000/0.001/0.001             |
| <b>An-O<sup>VI</sup>1</b>                                        | <b>0.323/0.286/0.341/0.319/0.281/0.292</b> | <b>0.170/0.204/0.217/0.174/0.212/0.227</b> | <b>-0.321/-0.248/-0.331/-0.313/-0.240/-0.249</b> |
| <b>AnO<sub>2</sub>L1<sup>2-/3-</sup>(a)</b>                      |                                            |                                            |                                                  |
| An-N1                                                            | 0.049/0.036/0.036/0.037/0.035/0.036        | 0.121/0.117/0.123/0.106/0.112/0.117        | -0.005/-0.001/-0.001/-0.002/-0.001/-0.001        |
| An-N2                                                            | 0.026/0.022/0.021/0.022/0.021/0.021        | 0.069/0.073/0.074/0.066/0.068/0.066        | 0.000/0.001/0.001/0.000/0.001/0.001              |
| An-N3                                                            | 0.026/0.023/0.021/0.022/0.021/0.021        | 0.069/0.075/0.072/0.065/0.068/0.066        | 0.000/0.001/0.001/0.000/0.001/0.001              |
| <b>An-O<sup>VI</sup>1</b>                                        | <b>0.330/0.288/0.298/0.270/0.286/0.286</b> | <b>0.163/0.199/0.216/0.216/0.204/0.269</b> | <b>-0.333/-0.253/-0.260/-0.231/-0.248/-0.237</b> |

(a) The values for the equivalent bonds of An-N1\*/N2\*/N3\* are not shown for simplicity.

(b) The “-” means that the BCP of An-N does not exist.

**Table S15.** The three quantities in the framework of AIM technique in the complexes of AnO<sub>2</sub>L1<sup>2-/3-</sup>, AnO<sub>2</sub>H<sub>2</sub>L1<sup>0/-</sup>, AnO<sub>2</sub>L2<sup>0/-</sup>, and AnO<sub>2</sub>L3<sup>-2/-</sup> in methanol. The data are

given in the format of U(VI)/Np(VI)/Pu(VI)/U(V)/Np(V)/Pu(V).

|                                                     | $\rho_b$                                   | $\nabla^2\rho_b$                           | $H_b(r)$                                         |
|-----------------------------------------------------|--------------------------------------------|--------------------------------------------|--------------------------------------------------|
| <b>AnO<sub>2</sub>H<sub>2</sub>L1<sup>0/-</sup></b> |                                            |                                            |                                                  |
| An-N1 <sup>(a)</sup>                                | 0.019/-/-/-/-                              | 0.059/-/-/-/-                              | 0.000/-/-/-/-                                    |
| An-N1*                                              | 0.068/0.053/0.052/0.057/0.056/0.054        | 0.161/0.165/0.167/0.155/0.160/0.163        | -0.012/-0.005/-0.005/-0.007/-0.007/-0.006        |
| An-N2 <sup>(a)</sup>                                | -/-/-/-/-                                  | -/-/-/-/-                                  | -/-/-/-/-                                        |
| An-N2*                                              | 0.081/0.063/0.061/0.066/0.067/0.065        | 0.185/0.187/0.194/0.175/0.186/0.193        | -0.018/-0.009/-0.008/-0.011/-0.011/-0.010        |
| An-N3 <sup>(a)</sup>                                | -/-/-/-/-                                  | -/-/-/-/-                                  | -/-/-/-/-                                        |
| An-N3*                                              | 0.070/0.050/0.049/0.054/0.054/0.053        | 0.163/0.154/0.154/0.149/0.162/0.163        | -0.013/-0.004/-0.004/-0.006/-0.006/-0.006        |
| <b>An-O<sup>yl</sup>1</b>                           | <b>0.319/0.282/0.294/0.262/0.275/0.288</b> | <b>0.170/0.205/0.221/0.207/0.226/0.232</b> | <b>-0.313/-0.242/-0.252/-0.218/-0.229/-0.242</b> |
| <b>An-O<sup>yl</sup>2</b>                           | <b>0.317/0.272/0.284/0.252/0.266/0.280</b> | <b>0.180/0.229/0.242/0.228/0.245/0.248</b> | <b>-0.309/-0.225/-0.236/-0.203/-0.215/-0.230</b> |
| <b>AnO<sub>2</sub>L2<sup>0/-</sup></b>              |                                            |                                            |                                                  |
| An-O3                                               | 0.033/0.028/0.027/0.033/0.027/0.026        | 0.127/0.113/0.113/0.125/0.106/0.105        | 0.001/0.001/0.002/0.001/0.001/0.002              |
| An-N1                                               | 0.056/0.044/0.043/0.058/0.041/0.040        | 0.142/0.137/0.136/0.146/0.127/0.125        | -0.007/-0.003/-0.003/-0.008/-0.002/-0.002        |
| An-N1*                                              | 0.056/0.041/0.041/0.058/0.041/0.040        | 0.142/0.128/0.131/0.147/0.124/0.126        | -0.007/-0.002/-0.002/-0.008/-0.002/-0.002        |
| An-N2                                               | 0.067/0.051/0.050/0.069/0.051/0.050        | 0.166/0.170/0.169/0.166/0.164/0.163        | -0.011/-0.004/-0.004/-0.012/-0.004/-0.004        |
| An-N2*                                              | 0.067/0.050/0.049/0.069/0.051/0.050        | 0.166/0.162/0.166/0.166/0.160/0.164        | -0.011/-0.004/-0.004/-0.012/-0.004/-0.004        |
| <b>An-O<sup>yl</sup>1</b>                           | <b>0.319/0.277/0.289/0.311/0.271/0.284</b> | <b>0.177/0.228/0.233/0.185/0.237/0.242</b> | <b>-0.313/-0.232/-0.244/-0.299/-0.223/-0.236</b> |
| <b>An-O<sup>yl</sup>2</b>                           | <b>0.319/0.277/0.289/0.311/0.271/0.284</b> | <b>0.177/0.228/0.233/0.185/0.237/0.241</b> | <b>-0.313/-0.233/-0.245/-0.299/-0.223/-0.236</b> |
| <b>AnO<sub>2</sub>L3<sup>-2-</sup></b>              |                                            |                                            |                                                  |
| An-N1                                               | 0.043/0.034/0.039/0.052/0.034/0.031        | 0.112/0.110/0.112/0.131/0.116/0.103        | -0.003/0.001/-0.002/-0.006/0.001/0.000           |
| An-N1*                                              | 0.043/0.034/0.039/0.052/0.035/0.032        | 0.112/0.110/0.113/0.132/0.109/0.105        | -0.003/0.001/-0.002/-0.006/0.001/0.000           |
| An-N2                                               | 0.060/0.049/0.059/0.058/0.048/0.047        | 0.149/0.154/0.159/0.148/0.148/0.152        | -0.008/-0.004/-0.008/-0.007/-0.004/-0.003        |
| An-N2*                                              | 0.060/0.048/0.059/0.058/0.047/0.046        | 0.149/0.152/0.159/0.148/0.146/0.151        | -0.008/-0.004/-0.008/-0.007/-0.003/-0.003        |
| An-N3                                               | 0.034/0.026/0.031/0.025/0.024/0.024        | 0.092/0.085/0.093/0.072/0.078/0.080        | -0.001/0.000/0.001/0.000/0.000/0.001             |
| An-N3*                                              | 0.034/0.026/0.031/0.026/0.024/0.024        | 0.092/0.085/0.093/0.073/0.079/0.081        | -0.001/0.000/0.001/0.000/0.000/0.001             |
| <b>An-O<sup>yl</sup>1</b>                           | <b>0.313/0.270/0.333/0.300/0.267/0.277</b> | <b>0.180/0.231/0.226/0.192/0.237/0.251</b> | <b>-0.303/-0.222/-0.317/-0.279/-0.216/-0.224</b> |
| <b>An-O<sup>yl</sup>2</b>                           | <b>0.311/0.268/0.331/0.297/0.264/0.275</b> | <b>0.181/0.234/0.226/0.193/0.241/0.254</b> | <b>-0.299/-0.218/-0.313/-0.275/-0.211/-0.220</b> |
| <b>AnO<sub>2</sub>L1<sup>2-/3-</sup></b>            |                                            |                                            |                                                  |
| An-N1                                               | 0.052/0.040/0.039/0.042/0.040/0.039        | 0.125/0.124/0.126/0.115/0.119/0.116        | -0.006/-0.002/-0.002/-0.002/-0.002/-0.002        |
| An-N1*                                              | 0.052/0.040/0.039/0.042/0.040/0.039        | 0.125/0.125/0.126/0.115/0.119/0.118        | -0.006/-0.002/0.001/-0.002/-0.002/-0.002         |
| An-N2                                               | 0.029/0.023/0.023/0.021/0.018/0.011        | 0.073/0.075/0.074/0.061/0.056/0.033        | 0.001/0.000/0.001/0.000/0.001/0.001              |
| An-N2*                                              | 0.027/0.024/0.022/0.026/0.027/0.041        | 0.070/0.077/0.073/0.078/0.083/0.123        | 0.001/0.000/0.001/0.000/0.000/-0.002             |
| An-N3                                               | 0.030/0.023/0.022/0.021/0.018/0.011        | 0.075/0.076/0.073/0.061/0.056/0.033/       | 0.001/0.000/0.001/0.000/0.001/0.001              |
| An-N3*                                              | 0.027/0.023/0.023/0.026/0.027/0.040        | 0.070/0.076/0.074/0.078/0.083/0.122        | 0.001/0.000/0.001/0.000/0.000/-0.002             |
| <b>An-O<sup>yl</sup>1</b>                           | <b>0.319/0.271/0.284/0.256/0.270/0.280</b> | <b>0.172/0.233/0.237/0.219/0.229/0.245</b> | <b>-0.312/-0.223/-0.225/-0.208/-0.221/-0.230</b> |
| <b>An-O<sup>yl</sup>2</b>                           | <b>0.318/0.271/0.284/0.256/0.270/0.280</b> | <b>0.171/0.234/0.237/0.219/0.229/0.245</b> | <b>-0.312/-0.222/-0.236/-0.209/-0.221/-0.230</b> |

(a) The “-” means that the BCP of An-N does not exist.

**Table S16.** The value of DI in the framework of AIM technique in the complexes of AnO<sub>2</sub>H<sub>2</sub>L1<sup>0/-</sup>, AnO<sub>2</sub>L2<sup>0/-</sup>, AnO<sub>2</sub>L3<sup>-2-</sup> and AnO<sub>2</sub>L1<sup>2-/3-</sup> in vacuum and in methanol. The data are

given in the format of U(VI)/Np(VI)/Pu(VI)/U(V)/Np(V)/Pu(V).

|                                                     | Vacuum                                     | MeOH                                        |
|-----------------------------------------------------|--------------------------------------------|---------------------------------------------|
| <b>AnO<sub>2</sub>H<sub>2</sub>L<sup>10/-</sup></b> | <b>DI</b>                                  | <b>DI</b>                                   |
| An-N1                                               | 0.639/0.445/0.444/0.395/0.390/0.368        | 0.458/0.251/0.276/0.223/0.252/0.282         |
| An-N1*                                              | 1.121/0.955/0.958/0.995/0.990/0.993        | 1.138/1.066/1.000/1.043/1.038/1.030         |
| An-N2                                               | 0.341/0.372/0.378/0.324/0.312/0.293        | 0.231/0.197/0.219/0.181/0.197/0.219         |
| An-N2*                                              | 1.173/1.012/0.943/1.035/1.038 /1.044       | 1.188/1.066/1.059/1.087 /1.086 /1.079       |
| An-N3                                               | 0.143/0.171/0.172/0.155/0.146/0.140        | 0.108/0.135/0.142/0.123/0.123/0.126         |
| An-N3*                                              | 1.116/0.949/1.008/0.981/0.984/0.990        | 1.135/0.988/0.982/1.026/1.032/1.028         |
| <b>An-O<sup>y1</sup></b>                            | <b>2.917/2.869/2.875/2.845/2.855/2.861</b> | <b>2.879/2.814/2.825/2.776/2.797/2.812</b>  |
| <b>An-O<sup>y2</sup></b>                            | <b>2.887/2.781/2.794/2.726/2.766/2.781</b> | <b>2.860/2.721/2.745/2.678/2.717/2.748</b>  |
| <b>AnO<sub>2</sub>L<sup>20/-</sup></b>              | <b>DI</b>                                  | <b>DI</b>                                   |
| An-O                                                | 0.770/0.708/0.709/0.754/0.696/0.694        | 0.795/0.722/0.723/0.792/0.724/0.724         |
| An-N1                                               | 1.025/0.909/0.907/1.038/0.893/0.890        | 1.054/0.947/0.945/1.087/0.940/0.937         |
| An-N1*                                              | 1.023/0.897/0.899/1.041/0.888/0.890        | 1.053/0.921/0.922/1.091/0.938/0.938         |
| An-N2                                               | 1.081/0.938/0.937/1.097/0.947/0.947        | 1.105/0.984/0.982/1.129/0.994/0.991         |
| An-N2*                                              | 1.080/0.937/0.936/1.097/0.949/0.948        | 1.103/0.972/0.967/1.130/0.999/0.993         |
| <b>An-O<sup>y1</sup></b>                            | <b>2.904/2.841/2.851/2.893/2.832/2.843</b> | <b>2.882/2.804/2.817/2.864//2.791/2.806</b> |
| <b>An-O<sup>y2</sup></b>                            | <b>2.904/2.840/2.850/2.894/2.832/2.843</b> | <b>2.883/2.805/2.818/2.865/2.792/2.806</b>  |
| <b>AnO<sub>2</sub>L<sup>3-2-</sup></b>              | <b>DI</b>                                  | <b>DI</b>                                   |
| An-N1                                               | 0.926/0.811/0.913/1.028/0.832/0.821        | 0.948/0.855/0.925/1.051/0.867/0.851         |
| An-N1*                                              | 0.926/0.812/0.913/1.027/0.832/0.822        | 0.947/0.853/0.924/1.048/0.871/0.855         |
| An-N2                                               | 1.007/0.904/1.022/0.996/0.898/0.904        | 1.043/0.952/1.058/1.039/0.854/0.955         |
| An-N2*                                              | 1.008/0.906/1.023/0.996/0.900/0.903        | 1.041/0.947/1.055/1.040/0.951/0.953         |
| An-N3                                               | 0.766/0.688/0.756/0.669/0.653/0.658        | 0.811/0.727/0.801/0.732/0.716/0.722         |
| An-N3*                                              | 0.768/0.691/0.759/0.671/0.654/0.656        | 0.809/0.724/0.799/0.733/0.713/0.719         |
| <b>An-O<sup>y1</sup></b>                            | <b>2.894/2.826/2.902/2.885/2.822/2.830</b> | <b>2.867/2.876/2.881/2.841/2.777/2.789</b>  |
| <b>An-O<sup>y2</sup></b>                            | <b>2.895/2.829/2.899/2.886/2.820/2.829</b> | <b>2.866/2.784/2.877/2.839/2.773/2.785</b>  |
| <b>AnO<sub>2</sub>L<sup>12-3-</sup></b>             | <b>DI</b>                                  | <b>DI</b>                                   |
| An-N1                                               | 0.989/0.838/0.855/0.842/0.850/0.863        | 1.032/0.909/0.909/0.932/0.919/0.911         |
| An-N1*                                              | 0.989/0.850/0.842/0.843/0.850/0.863        | 1.028/0.915/0.904/0.932/0.920/0.915         |
| An-N2                                               | 0.787/0.719/0.720/0.704/0.707/0.695        | 0.839/0.763/0.761/0.729/0.695/0.543         |
| An-N2*                                              | 0.783/0.724/0.714/0.712/0.707/0.693        | 0.816/0.768/0.760/0.804/0.816/0.929         |
| An-N3                                               | 0.787/0.724/0.714/0.700/0.707/0.694        | 0.847/0.765/0.760/0.726/0.695/0.542         |
| An-N3*                                              | 0.783/0.719/0.720/0.711/0.707/0.693        | 0.826/0.768/0.761/0.800/0.817/0.927         |
| <b>An-O<sup>y1</sup></b>                            | <b>2.911/2.838/2.845/2.813/2.833/2.823</b> | <b>2.884/2.793/2.808/2.766/2.790/2.801</b>  |
| <b>An-O<sup>y2</sup></b>                            | <b>2.911/2.837/2.846/2.813/2.833/2.823</b> | <b>2.883/2.792/2.808/2.767/2.790/2.801</b>  |

**7. The NICS values of the ligands and their complexation states with AnO<sub>2</sub><sup>2+/-</sup> (An = U, Np, Pu) in methanol**

**Table S17.** The NICS values of the three ligands in their deprotonated free states ( $\text{H}_2\text{L}^{2-}$ ,  $\text{L}^{2-}$ ,  $\text{L}^{3-}$  and  $\text{L}^{14-}$ ), and their complexation states with  $\text{AnO}_2^{2+/+}$  ( $\text{An} = \text{U}, \text{Np}, \text{Pu}$ ) in methanol. The definition of the rings please see Scheme 1.

| NICS(0)                   |                                             | A Ring        | B Ring        | C Ring        | A* Ring       | B* Ring       | C* Ring      | G Ring       |
|---------------------------|---------------------------------------------|---------------|---------------|---------------|---------------|---------------|--------------|--------------|
| $\text{H}_2\text{L}^{2-}$ | <b><math>\text{H}_2\text{L}^{2-}</math></b> | <b>-8.55</b>  | <b>-2.67</b>  | <b>5.16</b>   | <b>-7.79</b>  | <b>-2.85</b>  | <b>-6.55</b> | <b>4.61</b>  |
|                           | $\text{U}^{\text{VI}}$                      | -13.68        | 2.18          | -11.78        | 8.43          | 7.10          | 7.17         | -15.96       |
|                           | $\text{U}^{\text{V}}$                       | -10.17        | 0.41          | -7.58         | -4.66         | 2.93          | -3.62        | -2.31        |
|                           | $\text{Np}^{\text{V}}$                      | -8.78         | -1.50         | -6.92         | -8.89         | -2.30         | -7.72        | 2.52         |
|                           | $\text{Pu}^{\text{V}}$                      | -8.56         | -1.78         | -6.90         | -8.89         | -2.81         | -7.80        | 2.84         |
| $\text{L}^{24-}$          | <b><math>\text{L}^{2-}</math></b>           | <b>-3.10</b>  | <b>-1.67</b>  | <b>-10.02</b> | <b>-3.14</b>  | <b>-1.28</b>  |              | <b>-5.89</b> |
|                           | $\text{U}^{\text{VI}}$                      | -3.89         | -16.53        | -7.79         | -4.17         | -15.89        |              | -1.28        |
|                           | $\text{Np}^{\text{V}}$                      | -5.88         | -4.12         | -14.64        | -5.95         | -3.98         |              | -11.97       |
|                           | $\text{Pu}^{\text{V}}$                      | -5.57         | -4.02         | -14.05        | -5.68         | -3.80         |              | -11.02       |
| $\text{L}^{33-}$          | <b><math>\text{L}^{3-}</math></b>           | <b>-4.12</b>  | <b>-7.17</b>  | <b>-10.66</b> | <b>-4.09</b>  | <b>-7.25</b>  | -            | <b>1.23</b>  |
|                           | $\text{U}^{\text{VI}}$                      | 5.99          | -7.24         | -0.58         | 6.01          | -7.25         | -            | 2.80         |
|                           | $\text{Pu}^{\text{VI}}$                     | 5.87          | -7.44         | -1.15         | 5.87          | -7.44         | -            | 2.29         |
|                           | $\text{Np}^{\text{V}}$                      | 1.20          | -8.03         | -0.97         | 1.24          | -8.35         | -            | 5.84         |
|                           | $\text{Pu}^{\text{V}}$                      | -4.65         | -7.41         | -10.82        | -4.72         | -7.51         |              | -0.41        |
| $\text{L}^{14-}$          | <b><math>\text{L}^{14-}</math></b>          | <b>-8.63</b>  | <b>-4.19</b>  | <b>-4.20</b>  | <b>-8.63</b>  | <b>-4.19</b>  | <b>-4.20</b> | <b>2.93</b>  |
|                           | $\text{U}^{\text{VI}}$                      | -8.12         | -3.87         | -3.76         | -8.04         | -3.81         | -3.94        | 2.29         |
|                           | $\text{U}^{\text{V}}$                       | -8.43         | -4.18         | -4.24         | -8.42         | -4.18         | -4.50        | 2.84         |
|                           | $\text{Np}^{\text{V}}$                      | -8.32         | -4.04         | -4.30         | -8.32         | -4.13         | -4.17        | 3.18         |
|                           | $\text{Pu}^{\text{V}}$                      | -8.43         | -4.18         | -4.47         | -8.42         | -4.31         | -4.49        | 3.08         |
| NICS(1)                   |                                             | A Ring        | B Ring        | C Ring        | A* Ring       | B* Ring       | C* Ring      | G Ring       |
| $\text{H}_2\text{L}^{2-}$ | <b><math>\text{H}_2\text{L}^{2-}</math></b> | <b>-10.46</b> | <b>-5.34</b>  | <b>4.19</b>   | <b>-12.03</b> | <b>-6.45</b>  | <b>-7.65</b> | <b>3.97</b>  |
|                           | $\text{U}^{\text{VI}}$                      | -21.55        | -2.99         | -17.63        | -0.55         | 2.15          | 0.83         | -7.27        |
|                           | $\text{U}^{\text{V}}$                       | -14.95        | -2.85         | -9.34         | -9.76         | 1.29          | -4.32        | 0.82         |
|                           | $\text{Np}^{\text{V}}$                      | -13.20        | -4.30         | -8.36         | -11.43        | -3.68         | -7.08        | 3.66         |
|                           | $\text{Pu}^{\text{V}}$                      | -13.22        | -4.44         | -8.66         | -11.02        | -4.46         | -7.16        | 3.72         |
| $\text{L}^{22-}$          | <b><math>\text{L}^{2-}</math></b>           | <b>-5.10</b>  | <b>-7.08</b>  | <b>-9.07</b>  | <b>-5.20</b>  | <b>-6.85</b>  |              | <b>-5.70</b> |
|                           | $\text{U}^{\text{VI}}$                      | -19.11        | -11.99        | -11.04        | -17.01        | -11.64        |              | 0.61         |
|                           | $\text{Np}^{\text{V}}$                      | -8.05         | -9.01         | -13.30        | -8.13         | -8.99         |              | -10.14       |
|                           | $\text{Pu}^{\text{V}}$                      | -7.84         | -8.88         | -12.90        | -8.03         | -8.80         |              | -9.45        |
| $\text{L}^{33-}$          | <b><math>\text{L}^{3-}</math></b>           | <b>-6.84</b>  | <b>-15.18</b> | <b>-9.58</b>  | <b>-7.17</b>  | <b>-15.31</b> | -            | <b>1.34</b>  |
|                           | $\text{U}^{\text{VI}}$                      | -3.38         | -11.72        | 1.30          | -3.30         | -13.24        | -            | 8.23         |
|                           | $\text{Pu}^{\text{VI}}$                     | -3.52         | -12.01        | 0.62          | -3.43         | -13.50        | -            | 7.33         |
|                           | $\text{Np}^{\text{V}}$                      | -4.58         | -11.09        | 1.44          | -4.27         | -12.74        | -            | 9.92         |
|                           | $\text{Pu}^{\text{V}}$                      | -7.57         | -11.61        | -10.84        | -7.50         | -13.02        |              | 0.25         |
| $\text{L}^{14-}$          | <b><math>\text{L}^{14-}</math></b>          | <b>-12.60</b> | <b>-6.44</b>  | <b>-6.44</b>  | <b>-12.59</b> | <b>-6.44</b>  | <b>-6.44</b> | <b>2.37</b>  |
|                           | $\text{U}^{\text{VI}}$                      | -8.08         | -5.21         | -5.03         | -10.95        | -6.37         | -6.91        | 3.20         |



|                 |        |       |       |        |       |       |      |
|-----------------|--------|-------|-------|--------|-------|-------|------|
| U <sup>V</sup>  | -9.77  | -5.58 | -5.65 | -10.23 | -5.72 | -6.02 | 3.03 |
| Np <sup>V</sup> | -10.04 | -5.65 | -5.82 | -9.95  | -5.69 | -5.72 | 3.21 |
| Pu <sup>V</sup> | -10.17 | -6.41 | -6.62 | -10.20 | -5.50 | -5.64 | 3.06 |

## 8. The population analysis of the bare AnO<sub>2</sub><sup>2+/+</sup> and AnO<sub>2</sub>(H<sub>2</sub>O)<sub>5</sub><sup>2+/+</sup> in vacuum and in methanol.

**Table S18.** The natural charges ( $q'$ ) and the spin densities ( $s$ ) of key atoms in bare AnO<sub>2</sub><sup>2+/+</sup>, and the Mayer atomic bond orders (MBO) and the Wiberg bond index (WBI) of the bare AnO<sub>2</sub><sup>2+/+</sup> in vacuum and in MeOH.

|                                | $q'$ |         | $s$ |         | MBO       | WBI       |
|--------------------------------|------|---------|-----|---------|-----------|-----------|
|                                | An   | O1/O2   | An  | O1/O2   | An-       | An-       |
| Vacuu                          |      |         |     |         |           |           |
| UO <sub>2</sub> <sup>2+</sup>  | 2.8  | -0.40/- | -   | -       | 2.02/2.02 | 2.23/2.23 |
| NpO <sub>2</sub> <sup>2+</sup> | 2.6  | -0.32/- | 1.1 | -0.06/- | 2.02/2.02 | 2.26/2.26 |
| PuO <sub>2</sub> <sup>2+</sup> | 2.4  | -0.24/- | 2.2 | -0.14/- | 2.10/2.10 | 2.27/2.27 |
| UO <sub>2</sub> <sup>+</sup>   | 2.3  | -0.65/- | 1.0 | -0.04/- | 1.92/1.92 | 2.01/2.01 |
| NpO <sub>2</sub> <sup>+</sup>  | 2.1  | -0.58/- | 2.1 | -0.09/- | 1.95/1.95 | 2.05/2.05 |
| PuO <sub>2</sub> <sup>+</sup>  | 2.0  | -0.52/- | 3.3 | -0.14/- | 2.04/2.04 | 2.06/2.06 |
| MeOH                           |      |         |     |         |           |           |
| UO <sub>2</sub> <sup>2+</sup>  | 3.2  | -0.62/- | -   | -       | 1.82/1.82 | 2.00/2.00 |
| NpO <sub>2</sub> <sup>2+</sup> | 3.0  | -0.51/- | 1.1 | -0.06/- | 1.85/1.85 | 2.06/2.06 |
| PuO <sub>2</sub> <sup>2+</sup> | 2.8  | -0.43/- | 2.2 | -0.14/- | 1.94/1.94 | 2.09/2.09 |
| UO <sub>2</sub> <sup>+</sup>   | 2.7  | -0.88/- | 1.0 | -0.04/- | 1.63/1.63 | 1.74/1.74 |
| NpO <sub>2</sub> <sup>+</sup>  | 2.5  | -0.79/- | 2.1 | -0.09/- | 1.70/1.70 | 1.81/1.81 |
| PuO <sub>2</sub> <sup>+</sup>  | 2.4  | -0.71/- | 3.3 | -0.15/- | 1.79/1.79 | 1.85/1.85 |

**Table S19** The bond length ( $d$ ), the Mulliken atomic charges ( $q$ ), the natural charges ( $q'$ ), and the spin densities ( $s$ ) of key atoms in bare AnO<sub>2</sub><sup>2+/+</sup>, and the Wiberg bond index (WBI) of the AnO<sub>2</sub>(H<sub>2</sub>O)<sub>5</sub><sup>2+/+</sup> in vacuum and in MeOH.

|                  | $d$                |                   | $q$  |                 |             | $q'$ |                 |             | $s$  |                 | WBI                |                   |
|------------------|--------------------|-------------------|------|-----------------|-------------|------|-----------------|-------------|------|-----------------|--------------------|-------------------|
|                  | An-O <sup>yl</sup> | An-O <sup>w</sup> | An   | O <sup>yl</sup> | $Q_A^{tot}$ | An   | O <sup>yl</sup> | $Q_A^{tot}$ | An   | O <sup>yl</sup> | An-O <sup>yl</sup> | An-O <sup>w</sup> |
| Vacuum           |                    |                   |      |                 |             |      |                 |             |      |                 |                    |                   |
| U <sup>VI</sup>  | 1.79               | 2.55              | 1.94 | -0.07           | 1.80        | 1.88 | -0.47           | 0.93        | -    | -               | 2.25               | 0.39              |
| Np <sup>VI</sup> | 1.71               | 2.46              | 1.72 | 0.04            | 1.81        | 1.63 | -0.35           | 0.92        | 1.09 | -0.05           | 2.30               | 0.39              |
| Pu <sup>VI</sup> | 1.69               | 2.44              | 1.54 | 0.14            | 1.82        | 1.45 | -0.26           | 0.93        | 2.24 | -0.12           | 2.32               | 0.39              |
| U <sup>V</sup>   | 1.73               | 2.47              | 1.94 | -0.38           | 1.17        | 1.61 | -0.70           | 0.21        | 1.05 | -0.04           | 2.03               | 0.30              |
| Np <sup>V</sup>  | 1.76               | 2.54              | 1.74 | -0.29           | 1.19        | 1.42 | -0.60           | 0.22        | 2.15 | -0.09           | 2.09               | 0.29              |
| Pu <sup>V</sup>  | 1.75               | 2.55              | 1.79 | -0.26           | 1.26        | 1.40 | -0.54           | 0.32        | 3.28 | -0.14           | 2.09               | 0.25              |
| MeOH             |                    |                   |      |                 |             |      |                 |             |      |                 |                    |                   |
| U <sup>VI</sup>  | 1.74               | 2.44              | 2.13 | -0.15           | 1.83        | 1.87 | -0.50           | 0.87        | -    | -               | 2.22               | 0.42              |
| Np <sup>VI</sup> | 1.71               | 2.43              | 1.89 | -0.03           | 1.83        | 1.61 | -0.38           | 0.85        | 1.09 | -0.06           | 2.28               | 0.42              |
| Pu <sup>VI</sup> | 1.69               | 2.41              | 1.69 | 0.08            | 1.85        | 1.43 | -0.28           | 0.86        | 2.24 | -0.12           | 2.30               | 0.41              |
| U <sup>V</sup>   | 1.81               | 2.53              | 2.22 | -0.54           | 1.13        | 1.63 | -0.75           | 0.13        | 1.05 | -0.04           | 1.97               | 0.33              |

|                       |      |      |      |       |      |      |       |      |      |       |      |      |
|-----------------------|------|------|------|-------|------|------|-------|------|------|-------|------|------|
| <b>Np<sup>v</sup></b> | 1.78 | 2.52 | 2.02 | -0.43 | 1.14 | 1.45 | -0.63 | 0.16 | 2.16 | -0.08 | 2.04 | 0.32 |
| <b>Pu<sup>v</sup></b> | 1.77 | 2.53 | 1.99 | -0.42 | 1.14 | 1.42 | -0.58 | 0.26 | 3.28 | -0.15 | 2.05 | 0.27 |

## 9. The integration accuracy and the convergence criteria in our calculations.

The integration accuracy in our calculations is default FineGrid, which is a pruned (75,302) grid, having 75 radial shells and 302 angular points per shell, resulting in about 7000 points per atom. The optimization convergence criteria is 0.00045 au for maximum force, 0.0003 au for RMS force, 0.0018 au for maximum displacement, and 0.0012 au for RMS displacement.

## 10. Coordinates and energies of stationary points (in vacuum)

### H<sub>4</sub>L1

E (CAM-B3LYP) = -1800.96504298 Hartree  
 Zero-point correction= 0.733461 (Hartree/Particle)  
 Sum of electronic and zero-point Energies= -1800.231582 Hartree  
 Sum of electronic and thermal Enthalpies= -1800.186918 Hartree  
 Sum of electronic and thermal Free Energies= -1800.306173 Hartree

| Center<br>Number | Atomic<br>Number | Coordinates(Angstroms) |           |           |
|------------------|------------------|------------------------|-----------|-----------|
|                  |                  | X                      | Y         | Z         |
| 1                | 7                | -0.263661              | -2.577600 | -0.433241 |
| 2                | 7                | 2.597929               | -1.673887 | -0.029015 |
| 3                | 7                | 2.801597               | 1.153092  | 0.127633  |
| 4                | 7                | 0.263608               | 2.577524  | 0.433131  |
| 5                | 7                | -2.597913              | 1.673969  | 0.028770  |
| 6                | 7                | -2.801547              | -1.153177 | -0.127710 |
| 7                | 6                | -1.446108              | -3.146012 | -0.031111 |
| 8                | 6                | -1.135056              | -4.299768 | 0.673735  |
| 9                | 6                | 0.281442               | -4.424606 | 0.680803  |
| 10               | 6                | 0.796234               | -3.347296 | -0.024099 |
| 11               | 6                | 2.179422               | -2.953021 | -0.234257 |
| 12               | 6                | 3.298823               | -3.724584 | -0.553724 |
| 13               | 6                | 4.422827               | -2.873653 | -0.494639 |
| 14               | 6                | 3.962769               | -1.595110 | -0.167974 |
| 15               | 6                | 4.682663               | -0.390981 | 0.055758  |
| 16               | 1                | 5.764607               | -0.483907 | 0.073387  |
| 17               | 6                | 4.162336               | 0.853548  | 0.249411  |
| 18               | 6                | 4.915350               | 2.069747  | 0.506119  |
| 19               | 6                | 4.008492               | 3.086166  | 0.511724  |
| 20               | 6                | 2.715635               | 2.459620  | 0.232147  |
| 21               | 6                | 1.446070               | 3.145946  | 0.031021  |
| 22               | 6                | 1.134998               | 4.299820  | -0.673686 |
| 23               | 6                | -0.281497              | 4.424729  | -0.680601 |
| 24               | 6                | -0.796264              | 3.347344  | 0.024171  |
| 25               | 6                | -2.179434              | 2.953052  | 0.234353  |
| 26               | 6                | -3.298789              | 3.724506  | 0.554127  |
| 27               | 6                | -4.422800              | 2.873576  | 0.494938  |

|    |   |           |           |           |
|----|---|-----------|-----------|-----------|
| 28 | 6 | -3.962719 | 1.595105  | 0.167876  |
| 29 | 6 | -2.715656 | -2.459693 | -0.232299 |
| 30 | 6 | -4.008467 | -3.086167 | -0.512040 |
| 31 | 6 | -4.915292 | -2.069768 | -0.506448 |
| 32 | 6 | -4.162293 | -0.853596 | -0.249617 |
| 33 | 6 | -4.682630 | 0.390947  | -0.055942 |
| 34 | 1 | -5.764591 | 0.483899  | -0.073588 |
| 35 | 6 | 5.835033  | -3.281883 | -0.768725 |
| 36 | 1 | 5.950908  | -3.648777 | -1.795469 |
| 37 | 1 | 6.535298  | -2.452908 | -0.639244 |
| 38 | 1 | 6.153052  | -4.092371 | -0.103298 |
| 39 | 6 | 3.315431  | -5.166383 | -0.958414 |
| 40 | 1 | 3.740304  | -5.816021 | -0.183913 |
| 41 | 1 | 2.305977  | -5.524952 | -1.172786 |
| 42 | 1 | 3.918775  | -5.309096 | -1.861956 |
| 43 | 6 | 1.059180  | -5.462758 | 1.428584  |
| 44 | 1 | 1.082895  | -6.426983 | 0.907099  |
| 45 | 1 | 2.092738  | -5.144230 | 1.582350  |
| 46 | 1 | 0.618508  | -5.644541 | 2.414671  |
| 47 | 6 | -2.072663 | -5.185610 | 1.436011  |
| 48 | 1 | -3.022777 | -4.685860 | 1.634759  |
| 49 | 1 | -2.290354 | -6.121540 | 0.908264  |
| 50 | 1 | -1.640085 | -5.459264 | 2.404007  |
| 51 | 6 | -4.251831 | -4.526237 | -0.848541 |
| 52 | 1 | -3.330856 | -5.008385 | -1.186215 |
| 53 | 1 | -4.630062 | -5.104875 | 0.001139  |
| 54 | 1 | -4.988492 | -4.616886 | -1.653285 |
| 55 | 6 | -6.390587 | -2.146184 | -0.736029 |
| 56 | 1 | -6.950732 | -1.964983 | 0.189276  |
| 57 | 1 | -6.725036 | -1.404238 | -1.468586 |
| 58 | 1 | -6.683256 | -3.132990 | -1.103583 |
| 59 | 6 | -3.315447 | 5.166232  | 0.959062  |
| 60 | 1 | -2.306011 | 5.524811  | 1.173505  |
| 61 | 1 | -3.740339 | 5.815976  | 0.184659  |
| 62 | 1 | -3.918807 | 5.308777  | 1.862622  |
| 63 | 6 | -1.059258 | 5.463039  | -1.428118 |
| 64 | 1 | -2.092924 | 5.144730  | -1.581564 |
| 65 | 1 | -1.082583 | 6.427263  | -0.906611 |
| 66 | 1 | -0.618879 | 5.644749  | -2.414353 |
| 67 | 6 | 2.072546  | 5.185657  | -1.436072 |
| 68 | 1 | 2.290363  | 6.121569  | -0.908332 |
| 69 | 1 | 3.022627  | 4.685865  | -1.634951 |
| 70 | 1 | 1.639840  | 5.459336  | -2.403999 |
| 71 | 6 | 6.390687  | 2.146388  | 0.735274  |
| 72 | 1 | 6.726333  | 1.400791  | 1.463515  |
| 73 | 1 | 6.950496  | 1.971009  | -0.191359 |
| 74 | 1 | 6.682524  | 3.131469  | 1.108135  |
| 75 | 6 | 4.251877  | 4.526243  | 0.848220  |
| 76 | 1 | 4.629872  | 5.104951  | -0.001525 |
| 77 | 1 | 3.330959  | 5.008331  | 1.186180  |
| 78 | 1 | 4.988778  | 4.616844  | 1.652763  |
| 79 | 6 | -5.835021 | 3.281624  | 0.769299  |
| 80 | 1 | -6.153130 | 4.092435  | 0.104301  |
| 81 | 1 | -6.535240 | 2.452660  | 0.639433  |

|    |   |           |           |           |
|----|---|-----------|-----------|-----------|
| 82 | 1 | -5.950842 | 3.647976  | 1.796244  |
| 83 | 1 | -0.208312 | -1.747777 | -1.000652 |
| 84 | 1 | 2.048022  | -0.848817 | 0.184484  |
| 85 | 1 | 0.208284  | 1.747680  | 1.000530  |
| 86 | 1 | -2.047964 | 0.848951  | -0.184803 |

-----

## H<sub>2</sub>L2

E (CAM-B3LYP) = -1689.25529310 Hartree  
 Zero-point correction= 0.694317 (Hartree/Particle)  
 Sum of electronic and zero-point Energies= -1688.560976 Hartree  
 Sum of electronic and thermal Enthalpies= -1688.520329 Hartree  
 Sum of electronic and thermal Free Energies= -1688.634331 Hartree

-----

| Center<br>Number | Atomic<br>Number | Coordinates(Angstroms) |           |           |
|------------------|------------------|------------------------|-----------|-----------|
|                  |                  | X                      | Y         | Z         |
| 1                | 7                | 1.306190               | 1.829780  | -0.160228 |
| 2                | 7                | -1.572819              | 1.485033  | -0.170842 |
| 3                | 7                | -2.599219              | -1.330761 | 0.003214  |
| 4                | 8                | 0.298221               | -3.036710 | -0.175068 |
| 5                | 7                | 2.785560               | -0.733628 | -0.387423 |
| 6                | 6                | -0.985036              | 2.663732  | -0.298192 |
| 7                | 6                | -1.899360              | 3.691161  | -0.801499 |
| 8                | 6                | -3.108867              | 3.074974  | -0.913308 |
| 9                | 6                | -2.895709              | 1.696003  | -0.504806 |
| 10               | 6                | 0.412857               | 2.842600  | 0.006347  |
| 11               | 6                | 1.117729               | 3.957799  | 0.506523  |
| 12               | 6                | 2.465554               | 3.594548  | 0.579645  |
| 13               | 6                | 2.566501               | 2.256224  | 0.154506  |
| 14               | 6                | -1.562590              | 5.075253  | -1.268246 |
| 15               | 1                | -1.764587              | 5.845526  | -0.516547 |
| 16               | 1                | -0.508596              | 5.154191  | -1.544377 |
| 17               | 1                | -2.154426              | 5.330556  | -2.153284 |
| 18               | 6                | 0.554667               | 5.248134  | 1.025666  |
| 19               | 1                | 0.666222               | 6.078369  | 0.319746  |
| 20               | 1                | -0.506226              | 5.152799  | 1.262937  |
| 21               | 1                | 1.067632               | 5.538804  | 1.947636  |
| 22               | 6                | -4.404184              | 3.670474  | -1.374109 |
| 23               | 6                | -5.239409              | 4.246490  | -0.222636 |
| 24               | 1                | -4.993732              | 2.919021  | -1.910989 |
| 25               | 1                | -4.200551              | 4.466542  | -2.099349 |
| 26               | 1                | -6.176731              | 4.674425  | -0.592469 |
| 27               | 1                | -5.483857              | 3.472180  | 0.511235  |
| 28               | 1                | -4.688495              | 5.033453  | 0.301103  |
| 29               | 6                | 3.590889               | 4.436388  | 1.103800  |
| 30               | 6                | 3.880533               | 4.191845  | 2.590508  |
| 31               | 1                | 3.354637               | 5.494335  | 0.948120  |
| 32               | 1                | 4.501703               | 4.245675  | 0.524197  |
| 33               | 1                | 4.155683               | 3.147427  | 2.765250  |
| 34               | 1                | 4.700410               | 4.826598  | 2.941857  |
| 35               | 1                | 2.998816               | 4.405459  | 3.202698  |
| 36               | 6                | -3.879589              | 0.747362  | -0.418951 |
| 37               | 1                | -4.893560              | 1.084398  | -0.609171 |
| 38               | 6                | -3.770597              | -0.620420 | -0.113406 |

|    |   |           |           |           |
|----|---|-----------|-----------|-----------|
| 39 | 6 | -4.840189 | -1.520020 | 0.079964  |
| 40 | 6 | -4.290631 | -2.775639 | 0.315759  |
| 41 | 6 | -2.880272 | -2.643113 | 0.243240  |
| 42 | 6 | -1.998542 | -3.752726 | 0.298640  |
| 43 | 1 | -2.523182 | -4.683114 | 0.484351  |
| 44 | 6 | -0.676493 | -3.974231 | 0.075533  |
| 45 | 6 | -0.084852 | -5.277880 | -0.008420 |
| 46 | 6 | 1.208584  | -5.116625 | -0.347620 |
| 47 | 1 | -0.628589 | -6.197955 | 0.154126  |
| 48 | 1 | 1.959279  | -5.876761 | -0.512180 |
| 49 | 6 | 1.473069  | -3.706145 | -0.428728 |
| 50 | 6 | 2.712298  | -3.195371 | -0.657454 |
| 51 | 1 | 3.415421  | -3.999945 | -0.845124 |
| 52 | 6 | 3.341111  | -1.915861 | -0.599905 |
| 53 | 6 | 4.810376  | -1.833770 | -0.689166 |
| 54 | 6 | 5.118563  | -0.531932 | -0.470795 |
| 55 | 6 | 3.734602  | 1.482759  | 0.011754  |
| 56 | 6 | 3.844198  | 0.150128  | -0.280962 |
| 57 | 1 | 4.663915  | 2.027307  | 0.149674  |
| 58 | 6 | 6.463146  | 0.121486  | -0.422487 |
| 59 | 1 | 6.537472  | 0.945472  | -1.140641 |
| 60 | 1 | 6.672967  | 0.537500  | 0.569912  |
| 61 | 1 | 7.260740  | -0.589200 | -0.652436 |
| 62 | 6 | 5.755799  | -2.977317 | -0.913046 |
| 63 | 6 | 6.081660  | -3.756646 | 0.368055  |
| 64 | 1 | 6.687874  | -2.593736 | -1.341773 |
| 65 | 1 | 5.349618  | -3.663597 | -1.665727 |
| 66 | 1 | 6.766947  | -4.585492 | 0.162316  |
| 67 | 1 | 6.550952  | -3.101681 | 1.108347  |
| 68 | 1 | 5.175916  | -4.168349 | 0.823891  |
| 69 | 6 | -5.039117 | -4.042946 | 0.609762  |
| 70 | 6 | -5.128693 | -4.356821 | 2.108542  |
| 71 | 1 | -4.576863 | -4.887935 | 0.086730  |
| 72 | 1 | -6.051353 | -3.965997 | 0.199892  |
| 73 | 1 | -5.688173 | -5.281116 | 2.285093  |
| 74 | 1 | -4.132421 | -4.471854 | 2.546698  |
| 75 | 1 | -5.631542 | -3.546593 | 2.645229  |
| 76 | 6 | -6.292459 | -1.155985 | 0.056899  |
| 77 | 1 | -6.916567 | -2.030001 | -0.145284 |
| 78 | 1 | -6.621306 | -0.735771 | 1.014433  |
| 79 | 1 | -6.513516 | -0.414554 | -0.716585 |
| 80 | 1 | -1.688418 | -0.890182 | -0.058872 |
| 81 | 1 | 1.099433  | 0.881031  | -0.451610 |

---

### H<sub>3</sub>L3

E (CAM-B3LYP) = -1991.80783871 Hartree  
 Zero-point correction= 0.796283 (Hartree/Particle)  
 Sum of electronic and zero-point Energies= -1991.011556 Hartree  
 Sum of electronic and thermal Enthalpies= -1990.963563 Hartree  
 Sum of electronic and thermal Free Energies= -1991.092942 Hartree

---

| Center | Atomic | Coordinates(Angstroms) |   |   |
|--------|--------|------------------------|---|---|
| Number | Number | X                      | Y | Z |

---

|    |   |           |           |           |
|----|---|-----------|-----------|-----------|
| 1  | 7 | -2.742360 | -1.382942 | -0.233552 |
| 2  | 7 | -0.044115 | -2.532060 | -0.072409 |
| 3  | 7 | 2.460291  | -1.470105 | -0.366758 |
| 4  | 6 | -4.543938 | 0.130962  | -0.911164 |
| 5  | 6 | -3.593244 | -3.397772 | -0.680847 |
| 6  | 6 | -2.478557 | -2.716280 | -0.182098 |
| 7  | 6 | -1.185461 | -3.198005 | 0.271308  |
| 8  | 6 | -0.822117 | -4.255664 | 1.101554  |
| 9  | 6 | 0.590381  | -4.213048 | 1.242170  |
| 10 | 6 | 1.042148  | -3.127610 | 0.502861  |
| 11 | 6 | 2.347582  | -2.538778 | 0.319988  |
| 12 | 6 | 3.686223  | -0.835426 | -0.567974 |
| 13 | 6 | 4.881474  | -1.538932 | -0.790214 |
| 14 | 6 | 6.076379  | -0.875389 | -1.005480 |
| 15 | 6 | -3.706616 | -4.874601 | -0.906122 |
| 16 | 6 | -1.747180 | -5.213346 | 1.789756  |
| 17 | 6 | 1.424550  | -5.118799 | 2.101511  |
| 18 | 6 | 1.542854  | -4.630258 | 3.550884  |
| 19 | 1 | 2.144486  | -5.319981 | 4.151642  |
| 20 | 1 | 2.013118  | -3.642894 | 3.590242  |
| 21 | 1 | 0.557932  | -4.542776 | 4.019796  |
| 22 | 8 | 7.266949  | -1.476960 | -1.255309 |
| 23 | 6 | 7.292061  | -2.883563 | -1.313122 |
| 24 | 1 | 0.992799  | -6.125968 | 2.092259  |
| 25 | 1 | -4.274970 | -5.381070 | -0.117313 |
| 26 | 1 | 6.987122  | -3.332667 | -0.359309 |
| 27 | 1 | -2.718398 | -5.339701 | -0.947955 |
| 28 | 1 | -4.213780 | -5.086610 | -1.853350 |
| 29 | 1 | -1.442732 | -5.378118 | 2.828175  |
| 30 | 1 | -1.772974 | -6.195102 | 1.301896  |
| 31 | 1 | 2.428343  | -5.219379 | 1.673438  |
| 32 | 1 | 3.198514  | -3.015537 | 0.822732  |
| 33 | 1 | 4.844057  | -2.620509 | -0.827031 |
| 34 | 1 | -2.769142 | -4.826792 | 1.804523  |
| 35 | 1 | 8.325566  | -3.159284 | -1.525058 |
| 36 | 1 | 6.644396  | -3.266917 | -2.111580 |
| 37 | 1 | -5.559697 | 0.170380  | -1.292950 |
| 38 | 7 | -2.622753 | 1.414774  | -0.158361 |
| 39 | 7 | 0.032137  | 2.419400  | 0.033764  |
| 40 | 7 | 2.501301  | 1.236810  | -0.343973 |
| 41 | 6 | -3.924949 | 1.319578  | -0.647236 |
| 42 | 6 | -4.481549 | 2.650950  | -0.827646 |
| 43 | 6 | -3.509381 | 3.526457  | -0.439256 |
| 44 | 6 | -2.378019 | 2.700105  | -0.025842 |
| 45 | 6 | -1.058143 | 3.146163  | 0.404218  |
| 46 | 6 | -0.612462 | 4.184070  | 1.224656  |
| 47 | 6 | 0.796477  | 4.054077  | 1.333441  |
| 48 | 6 | 1.165014  | 2.944859  | 0.578462  |
| 49 | 6 | 2.435861  | 2.294161  | 0.366432  |
| 50 | 6 | 3.706711  | 0.565868  | -0.557609 |
| 51 | 6 | 4.923276  | 1.234701  | -0.771624 |

|    |   |           |           |           |
|----|---|-----------|-----------|-----------|
| 52 | 6 | 6.097454  | 0.537754  | -0.996304 |
| 53 | 6 | -5.857573 | 2.964677  | -1.329580 |
| 54 | 1 | -6.162626 | 2.220442  | -2.074093 |
| 55 | 1 | -5.844207 | 3.927051  | -1.853357 |
| 56 | 6 | -6.903126 | 3.018952  | -0.207572 |
| 57 | 1 | -7.896016 | 3.248602  | -0.607153 |
| 58 | 1 | -6.645050 | 3.787446  | 0.527150  |
| 59 | 1 | -6.960414 | 2.062513  | 0.321123  |
| 60 | 6 | -3.543606 | 5.020916  | -0.525855 |
| 61 | 6 | -1.448751 | 5.180125  | 1.970390  |
| 62 | 6 | 1.711997  | 4.948917  | 2.115742  |
| 63 | 6 | 1.987782  | 6.287933  | 1.421651  |
| 64 | 1 | 2.651157  | 6.915758  | 2.025386  |
| 65 | 1 | 2.459359  | 6.130066  | 0.446767  |
| 66 | 1 | 1.059401  | 6.842232  | 1.253265  |
| 67 | 8 | 7.305521  | 1.106262  | -1.238594 |
| 68 | 6 | 7.373752  | 2.512200  | -1.276703 |
| 69 | 1 | 1.277222  | 5.141318  | 3.104479  |
| 70 | 1 | -2.546545 | 5.425037  | -0.721918 |
| 71 | 1 | 6.738275  | 2.926383  | -2.069498 |
| 72 | 1 | -3.909335 | 5.490759  | 0.393843  |
| 73 | 1 | -4.201140 | 5.347642  | -1.337409 |
| 74 | 1 | -1.024990 | 5.371306  | 2.961746  |
| 75 | 1 | -2.466996 | 4.813138  | 2.118427  |
| 76 | 1 | 2.662178  | 4.437016  | 2.303252  |
| 77 | 1 | 3.311943  | 2.719394  | 0.872065  |
| 78 | 1 | 4.919394  | 2.317247  | -0.794383 |
| 79 | 1 | -1.516575 | 6.147169  | 1.458781  |
| 80 | 1 | 8.415276  | 2.758945  | -1.485038 |
| 81 | 1 | 7.082543  | 2.956896  | -0.316598 |
| 82 | 6 | -4.000110 | -1.169211 | -0.741312 |
| 83 | 6 | -4.553922 | -2.424040 | -1.027080 |
| 84 | 6 | -5.914682 | -2.690900 | -1.596373 |
| 85 | 1 | -5.837719 | -3.460572 | -2.374198 |
| 86 | 1 | -6.293034 | -1.794939 | -2.099877 |
| 87 | 6 | -6.928874 | -3.146271 | -0.539872 |
| 88 | 1 | -7.905577 | -3.344259 | -0.992822 |
| 89 | 1 | -6.594610 | -4.062242 | -0.043431 |
| 90 | 1 | -7.057974 | -2.380315 | 0.230930  |
| 91 | 1 | -2.173226 | -0.601581 | 0.083119  |
| 92 | 1 | 0.045498  | -1.731334 | -0.680010 |
| 93 | 1 | 0.019573  | 1.583066  | -0.529308 |

-----

**UO<sub>2</sub>L1<sup>2-</sup>**

E (CAM-B3LYP) = -2426.14872368 Hartree  
Zero-point correction= 0.688535 (Hartree/Particle)  
Sum of electronic and zero-point Energies= -2425.460189Hartree  
Sum of electronic and thermal Enthalpies= -2425.412810 Hartree  
Sum of electronic and thermal Free Energies= -2425.539703 Hartree

-----

| Center | Atomic | Coordinates(Angstroms) |
|--------|--------|------------------------|
|--------|--------|------------------------|

| Number | Number | X         | Y         | Z         |
|--------|--------|-----------|-----------|-----------|
| 1      | 6      | -3.392124 | 1.085297  | 0.072137  |
| 2      | 6      | -4.649270 | 0.707232  | 0.559236  |
| 3      | 7      | -2.611204 | 0.000521  | -0.179963 |
| 4      | 6      | -4.649491 | -0.704130 | 0.560867  |
| 5      | 6      | -3.392470 | -1.083560 | 0.074500  |
| 6      | 6      | -2.805540 | -2.379912 | -0.126692 |
| 7      | 6      | -3.446126 | -3.620820 | -0.456821 |
| 8      | 7      | -1.483455 | -2.501116 | -0.015621 |
| 9      | 6      | -2.436863 | -4.558474 | -0.469554 |
| 10     | 6      | -1.227437 | -3.851976 | -0.186678 |
| 11     | 6      | 0.000104  | -4.454703 | -0.000134 |
| 12     | 1      | 0.000132  | -5.542044 | -0.000161 |
| 13     | 6      | 1.227596  | -3.851947 | 0.186466  |
| 14     | 6      | 2.437040  | -4.558433 | 0.469348  |
| 15     | 7      | 1.483581  | -2.501055 | 0.015567  |
| 16     | 6      | 3.446280  | -3.620770 | 0.456699  |
| 17     | 6      | 2.805645  | -2.379816 | 0.126732  |
| 18     | 6      | 3.392552  | -1.083432 | -0.074274 |
| 19     | 6      | 4.649656  | -0.703926 | -0.560361 |
| 20     | 7      | 2.611183  | 0.000608  | 0.180114  |
| 21     | 6      | 4.649349  | 0.707433  | -0.558718 |
| 22     | 6      | 3.392097  | 1.085425  | -0.071815 |
| 23     | 6      | 2.804871  | 2.381580  | 0.130633  |
| 24     | 6      | 3.445122  | 3.621999  | 0.463479  |
| 25     | 7      | 1.483253  | 2.503138  | 0.016764  |
| 26     | 6      | 2.436055  | 4.559889  | 0.474833  |
| 27     | 6      | 1.227096  | 3.853809  | 0.188578  |
| 28     | 6      | -2.804990 | 2.381454  | -0.130523 |
| 29     | 6      | -3.445359 | 3.621831  | -0.463395 |
| 30     | 7      | -1.483359 | 2.503040  | -0.017025 |
| 31     | 6      | -2.436288 | 4.559695  | -0.475298 |
| 32     | 6      | -1.227249 | 3.853681  | -0.189179 |
| 33     | 6      | -0.000100 | 4.456596  | -0.000428 |
| 34     | 1      | -0.000152 | 5.543972  | -0.000609 |
| 35     | 6      | -2.579019 | -6.022268 | -0.754003 |
| 36     | 1      | -3.318200 | -6.200352 | -1.545257 |
| 37     | 1      | -1.636923 | -6.469053 | -1.085475 |
| 38     | 1      | -2.919041 | -6.588802 | 0.124798  |
| 39     | 6      | -4.868742 | -3.836551 | -0.876354 |
| 40     | 1      | -5.518236 | -4.218719 | -0.077086 |
| 41     | 1      | -5.311637 | -2.901176 | -1.229177 |
| 42     | 1      | -4.922696 | -4.562242 | -1.699168 |
| 43     | 6      | -5.717204 | -1.571024 | 1.159000  |
| 44     | 1      | -6.560937 | -1.776552 | 0.483841  |
| 45     | 1      | -5.311526 | -2.536884 | 1.472052  |
| 46     | 1      | -6.144392 | -1.095568 | 2.052047  |
| 47     | 6      | -5.716777 | 1.575959  | 1.155041  |
| 48     | 1      | -5.310747 | 2.542404  | 1.465830  |
| 49     | 1      | -6.560213 | 1.780236  | 0.479129  |



|    |    |           |           |           |
|----|----|-----------|-----------|-----------|
| 50 | 1  | -6.144446 | 1.102852  | 2.049110  |
| 51 | 6  | -4.867349 | 3.836626  | -0.885562 |
| 52 | 1  | -5.309671 | 2.900494  | -1.237119 |
| 53 | 1  | -5.518081 | 4.220364  | -0.088037 |
| 54 | 1  | -4.920162 | 4.560634  | -1.709944 |
| 55 | 6  | -2.578132 | 6.023150  | -0.761730 |
| 56 | 1  | -2.919636 | 6.590739  | 0.115830  |
| 57 | 1  | -1.635509 | 6.469602  | -1.092175 |
| 58 | 1  | -3.316028 | 6.200245  | -1.554416 |
| 59 | 6  | 4.866938  | 3.836952  | 0.886140  |
| 60 | 1  | 5.309276  | 2.900873  | 1.237813  |
| 61 | 1  | 5.517886  | 4.220828  | 0.088855  |
| 62 | 1  | 4.919358  | 4.560942  | 1.710567  |
| 63 | 6  | 5.716898  | 1.576233  | -1.154331 |
| 64 | 1  | 5.310848  | 2.542643  | -1.465200 |
| 65 | 1  | 6.560193  | 1.780587  | -0.478266 |
| 66 | 1  | 6.144773  | 1.103154  | -2.048315 |
| 67 | 6  | 5.717545  | -1.570767 | -1.158255 |
| 68 | 1  | 6.561134  | -1.776257 | -0.482904 |
| 69 | 1  | 5.311986  | -2.536648 | -1.471402 |
| 70 | 1  | 6.144910  | -1.095289 | -2.051203 |
| 71 | 6  | 2.579162  | -6.022277 | 0.753563  |
| 72 | 1  | 1.637398  | -6.468786 | 1.086357  |
| 73 | 1  | 2.917744  | -6.588897 | -0.125740 |
| 74 | 1  | 3.319419  | -6.200588 | 1.543748  |
| 75 | 6  | 4.868936  | -3.836444 | 0.876136  |
| 76 | 1  | 5.518441  | -4.218389 | 0.076771  |
| 77 | 1  | 5.311741  | -2.901078 | 1.229102  |
| 78 | 1  | 4.923003  | -4.562268 | 1.698821  |
| 79 | 6  | 2.577932  | 6.023359  | 0.761140  |
| 80 | 1  | 2.922071  | 6.590455  | -0.115705 |
| 81 | 1  | 1.634697  | 6.470435  | 1.088970  |
| 82 | 1  | 3.313835  | 6.200353  | 1.555716  |
| 83 | 8  | 0.123700  | -0.002908 | -1.739268 |
| 84 | 8  | -0.123769 | -0.002749 | 1.739203  |
| 85 | 92 | -0.000023 | -0.002769 | -0.000031 |

-----

**NpO<sub>2</sub>L1<sup>2-</sup>**

E (CAM-B3LYP) = -2463.60689570 Hartree  
Zero-point correction= 0.684807 (Hartree/Particle)  
Sum of electronic and zero-point Energies= -2462.922089 Hartree  
Sum of electronic and thermal Enthalpies= -2462.874360 Hartree  
Sum of electronic and thermal Free Energies= -2463.001762 Hartree

-----

| Center<br>Number | Atomic<br>Number | Coordinates(Angstroms) |           |           |
|------------------|------------------|------------------------|-----------|-----------|
|                  |                  | X                      | Y         | Z         |
| 1                | 7                | -2.689715              | -0.000193 | 0.219495  |
| 2                | 7                | -1.531261              | 2.490399  | 0.015294  |
| 3                | 7                | 1.527454               | 2.487474  | -0.024512 |
| 4                | 7                | 2.694429               | 0.000153  | -0.215469 |

|    |   |           |           |           |
|----|---|-----------|-----------|-----------|
| 5  | 7 | 1.527805  | -2.487299 | -0.024543 |
| 6  | 7 | -1.530916 | -2.490645 | 0.015271  |
| 7  | 6 | -3.457822 | -1.084520 | -0.003927 |
| 8  | 6 | -4.765187 | -0.692878 | -0.453922 |
| 9  | 6 | -4.765307 | 0.692243  | -0.453815 |
| 10 | 6 | -3.457972 | 1.084027  | -0.003926 |
| 11 | 6 | -2.861317 | 2.377488  | 0.137034  |
| 12 | 6 | -3.481021 | 3.657434  | 0.414232  |
| 13 | 6 | -2.455692 | 4.569908  | 0.391529  |
| 14 | 6 | -1.253173 | 3.819044  | 0.132196  |
| 15 | 6 | 0.001100  | 4.409747  | -0.032432 |
| 16 | 1 | -0.002080 | 5.498274  | -0.053834 |
| 17 | 6 | 1.242988  | 3.822660  | -0.172174 |
| 18 | 6 | 2.455803  | 4.568863  | -0.432008 |
| 19 | 6 | 3.475382  | 3.658398  | -0.424268 |
| 20 | 6 | 2.848942  | 2.376453  | -0.127469 |
| 21 | 6 | 3.457950  | 1.084344  | 0.029714  |
| 22 | 6 | 4.744473  | 0.697573  | 0.506755  |
| 23 | 6 | 4.744577  | -0.696946 | 0.506774  |
| 24 | 6 | 3.458109  | -1.083921 | 0.029752  |
| 25 | 6 | 2.849284  | -2.376112 | -0.127424 |
| 26 | 6 | 3.475913  | -3.657990 | -0.424135 |
| 27 | 6 | 2.456454  | -4.568585 | -0.431907 |
| 28 | 6 | 1.243526  | -3.822528 | -0.172157 |
| 29 | 6 | -2.860989 | -2.377906 | 0.137069  |
| 30 | 6 | -3.480472 | -3.657921 | 0.414474  |
| 31 | 6 | -2.455028 | -4.570261 | 0.391662  |
| 32 | 6 | -1.252637 | -3.819245 | 0.132212  |
| 33 | 6 | 0.001718  | -4.409781 | -0.032410 |
| 34 | 1 | -0.001309 | -5.498309 | -0.053757 |
| 35 | 6 | -2.540757 | 6.046709  | 0.629928  |
| 36 | 1 | -3.510529 | 6.323585  | 1.057696  |
| 37 | 1 | -1.764744 | 6.395692  | 1.320830  |
| 38 | 1 | -2.424671 | 6.625124  | -0.297512 |
| 39 | 6 | -4.898706 | 3.925873  | 0.826063  |
| 40 | 1 | -5.546215 | 4.254064  | 0.002515  |
| 41 | 1 | -5.354733 | 3.030685  | 1.256639  |
| 42 | 1 | -4.935975 | 4.711930  | 1.590603  |
| 43 | 6 | -5.841749 | 1.563398  | -1.028240 |
| 44 | 1 | -6.622551 | 1.837460  | -0.305579 |
| 45 | 1 | -5.424713 | 2.492915  | -1.423528 |
| 46 | 1 | -6.348349 | 1.054940  | -1.857899 |
| 47 | 6 | -5.841461 | -1.564085 | -1.028579 |
| 48 | 1 | -5.424268 | -2.493467 | -1.424011 |
| 49 | 1 | -6.622280 | -1.838381 | -0.306027 |
| 50 | 1 | -6.348071 | -1.055548 | -1.858184 |
| 51 | 6 | -4.898025 | -3.926558 | 0.826632  |
| 52 | 1 | -5.354108 | -3.031416 | 1.257238  |
| 53 | 1 | -5.545655 | -4.254937 | 0.003258  |
| 54 | 1 | -4.934990 | -4.712557 | 1.591247  |
| 55 | 6 | -2.539862 | -6.047058 | 0.630167  |

|    |    |           |           |           |
|----|----|-----------|-----------|-----------|
| 56 | 1  | -2.423724 | -6.625521 | -0.297235 |
| 57 | 1  | -1.763772 | -6.395876 | 1.321065  |
| 58 | 1  | -3.509578 | -6.324048 | 1.057992  |
| 59 | 6  | 4.902288  | -3.906642 | -0.815624 |
| 60 | 1  | 5.350813  | -3.000121 | -1.230291 |
| 61 | 1  | 5.539458  | -4.228977 | 0.017684  |
| 62 | 1  | 4.962900  | -4.687320 | -1.583922 |
| 63 | 6  | 5.815619  | -1.564256 | 1.098954  |
| 64 | 1  | 5.400847  | -2.503254 | 1.474746  |
| 65 | 1  | 6.620521  | -1.822195 | 0.395900  |
| 66 | 1  | 6.294707  | -1.061359 | 1.948610  |
| 67 | 6  | 5.815379  | 1.565062  | 1.098915  |
| 68 | 1  | 6.620253  | 1.823090  | 0.395861  |
| 69 | 1  | 5.400463  | 2.504016  | 1.474661  |
| 70 | 1  | 6.294530  | 1.062273  | 1.948600  |
| 71 | 6  | 2.541154  | 6.039877  | -0.700368 |
| 72 | 1  | 1.811639  | 6.360984  | -1.452887 |
| 73 | 1  | 2.349390  | 6.635297  | 0.202785  |
| 74 | 1  | 3.535991  | 6.319199  | -1.063102 |
| 75 | 6  | 4.901700  | 3.907219  | -0.815857 |
| 76 | 1  | 5.538873  | 4.229699  | 0.017393  |
| 77 | 1  | 5.350326  | 3.000730  | -1.230487 |
| 78 | 1  | 4.962162  | 4.687852  | -1.584212 |
| 79 | 6  | 2.542013  | -6.039600 | -0.700196 |
| 80 | 1  | 2.350379  | -6.635004 | 0.202995  |
| 81 | 1  | 1.812511  | -6.360853 | -1.452666 |
| 82 | 1  | 3.536874  | -6.318793 | -1.062961 |
| 83 | 93 | 0.007112  | -0.000001 | -0.004086 |
| 84 | 8  | 0.195030  | -0.000309 | 1.774029  |
| 85 | 8  | -0.186235 | 0.000305  | -1.782117 |

-----

**PuO<sub>2</sub>L1<sup>2-</sup>**

E (CAM-B3LYP) = -2503.04264384 Hartree  
Zero-point correction= 0.684888 (Hartree/Particle)  
Sum of electronic and zero-point Energies= -2502.357756 Hartree  
Sum of electronic and thermal Enthalpies= -2502.310060 Hartree  
Sum of electronic and thermal Free Energies= -2502.437914 Hartree

-----

| Center<br>Number | Atomic<br>Number | Coordinates(Angstroms) |            |            |
|------------------|------------------|------------------------|------------|------------|
|                  |                  | X                      | Y          | Z          |
| 1                | 6                | 3.4500910              | -1.0823340 | 0.0418250  |
| 2                | 6                | 4.7370680              | -0.6953870 | 0.5167170  |
| 3                | 7                | 2.6844180              | 0.0010870  | -0.2011240 |
| 4                | 6                | 4.7364950              | 0.6992330  | 0.5167230  |
| 5                | 6                | 3.4492390              | 1.0851440  | 0.0417170  |
| 6                | 6                | 2.8427870              | 2.3778570  | -0.1203090 |
| 7                | 6                | 3.4721870              | 3.6570570  | -0.4254080 |
| 8                | 7                | 1.5224040              | 2.4917740  | -0.0166990 |
| 9                | 6                | 2.4545880              | 4.5694380  | -0.4375270 |
| 10               | 6                | 1.2403580              | 3.8266880  | -0.1727060 |

|    |   |            |            |            |
|----|---|------------|------------|------------|
| 11 | 6 | -0.0008750 | 4.4152480  | -0.0375470 |
| 12 | 1 | -0.0045110 | 5.5037870  | -0.0621290 |
| 13 | 6 | -1.2547290 | 3.8226320  | 0.1266490  |
| 14 | 6 | -2.4581340 | 4.5699940  | 0.3912060  |
| 15 | 7 | -1.5292300 | 2.4938840  | 0.0065410  |
| 16 | 6 | -3.4810470 | 3.6545530  | 0.4151550  |
| 17 | 6 | -2.8583440 | 2.3771880  | 0.1324280  |
| 18 | 6 | -3.4513410 | 1.0825340  | -0.0102510 |
| 19 | 6 | -4.7603790 | 0.6904910  | -0.4558790 |
| 20 | 7 | -2.6808460 | -0.0010270 | 0.2095190  |
| 21 | 6 | -4.7598210 | -0.6942750 | -0.4558150 |
| 22 | 6 | -3.4504800 | -1.0852210 | -0.0101070 |
| 23 | 6 | -2.8564520 | -2.3793950 | 0.1327380  |
| 24 | 6 | -3.4781240 | -3.6572080 | 0.4156790  |
| 25 | 7 | -1.5272500 | -2.4950500 | 0.0068290  |
| 26 | 6 | -2.4544820 | -4.5718460 | 0.3918150  |
| 27 | 6 | -1.2516830 | -3.8235680 | 0.1271100  |
| 28 | 6 | 2.8446710  | -2.3755430 | -0.1200510 |
| 29 | 6 | 3.4751190  | -3.6542750 | -0.4248710 |
| 30 | 7 | 1.5243780  | -2.4904950 | -0.0164520 |
| 31 | 6 | 2.4582390  | -4.5674650 | -0.4369820 |
| 32 | 6 | 1.2434040  | -3.8256570 | -0.1722910 |
| 33 | 6 | 0.0026460  | -4.4151930 | -0.0370330 |
| 34 | 1 | -0.0001050 | -5.5037360 | -0.0614520 |
| 35 | 6 | 2.5421040  | 6.0386160  | -0.7151500 |
| 36 | 1 | 3.5379630  | 6.3146750  | -1.0776160 |
| 37 | 1 | 1.8143730  | 6.3556780  | -1.4711370 |
| 38 | 1 | 2.3490050  | 6.6400350  | 0.1837580  |
| 39 | 6 | 4.8987210  | 3.9002770  | -0.8197030 |
| 40 | 1 | 5.5378960  | 4.2242570  | 0.0114460  |
| 41 | 1 | 5.3442120  | 2.9906750  | -1.2309640 |
| 42 | 1 | 4.9606330  | 4.6775830  | -1.5913390 |
| 43 | 6 | 5.8079660  | 1.5669770  | 1.1075620  |
| 44 | 1 | 6.6145220  | 1.8213980  | 0.4050460  |
| 45 | 1 | 5.3942000  | 2.5079310  | 1.4796280  |
| 46 | 1 | 6.2851070  | 1.0661650  | 1.9596730  |
| 47 | 6 | 5.8092560  | -1.5622980 | 1.1074800  |
| 48 | 1 | 5.3962550  | -2.5036140 | 1.4794900  |
| 49 | 1 | 6.6160020  | -1.8160290 | 0.4049300  |
| 50 | 1 | 6.2860100  | -1.0611590 | 1.9596160  |
| 51 | 6 | 4.9019270  | -3.8963970 | -0.8188570 |
| 52 | 1 | 5.3467650  | -2.9864830 | -1.2301410 |
| 53 | 1 | 5.5412000  | -4.2197490 | 0.0124630  |
| 54 | 1 | 4.9646270  | -4.6737460 | -1.5903850 |
| 55 | 6 | 2.5469500  | -6.0366140 | -0.7143750 |
| 56 | 1 | 2.3541460  | -6.6380510 | 0.1845860  |
| 57 | 1 | 1.8196080  | -6.3543570 | -1.4704530 |
| 58 | 1 | 3.5430930  | -6.3119510 | -1.0766060 |
| 59 | 6 | -4.8946200 | -3.9218520 | 0.8341960  |
| 60 | 1 | -5.3475770 | -3.0242420 | 1.2630060  |
| 61 | 1 | -5.5461190 | -4.2524150 | 0.0146880  |

|    |    |            |            |            |
|----|----|------------|------------|------------|
| 62 | 1  | -4.9300900 | -4.7047750 | 1.6020920  |
| 63 | 6  | -5.8372470 | -1.5660970 | -1.0274040 |
| 64 | 1  | -5.4211650 | -2.4969790 | -1.4205080 |
| 65 | 1  | -6.6178960 | -1.8377770 | -0.3036610 |
| 66 | 1  | -6.3440770 | -1.0592290 | -1.8580000 |
| 67 | 6  | -5.8385080 | 1.5613900  | -1.0275460 |
| 68 | 1  | -6.6193710 | 1.8325170  | -0.3038280 |
| 69 | 1  | -5.4231750 | 2.4925650  | -1.4207490 |
| 70 | 1  | -6.3449380 | 1.0540320  | -1.8580880 |
| 71 | 6  | -2.5459340 | 6.0458800  | 0.6344110  |
| 72 | 1  | -1.7701320 | 6.3942100  | 1.3259340  |
| 73 | 1  | -2.4314480 | 6.6276510  | -0.2911810 |
| 74 | 1  | -3.5159880 | 6.3196100  | 1.0636340  |
| 75 | 6  | -4.8977760 | 3.9181210  | 0.8335640  |
| 76 | 1  | -5.5495090 | 4.2479980  | 0.0139670  |
| 77 | 1  | -5.3500170 | 3.0202180  | 1.2625160  |
| 78 | 1  | -4.9339230 | 4.7011500  | 1.6013190  |
| 79 | 6  | -2.5411390 | -6.0477710 | 0.6351900  |
| 80 | 1  | -2.4271260 | -6.6295410 | -0.2904640 |
| 81 | 1  | -1.7645080 | -6.3955610 | 1.3260460  |
| 82 | 1  | -3.5106390 | -6.3220830 | 1.0653010  |
| 83 | 8  | -0.1386350 | -0.0001300 | -1.7655440 |
| 84 | 8  | 0.1488830  | 0.0000970  | 1.7583460  |
| 85 | 94 | 0.0069880  | -0.0000140 | -0.0035010 |

-----

**UO<sub>2</sub>L1<sup>3-</sup>**

E (CAM-B3LYP) = -2426.001667 Hartree  
 Zero-point correction= 0.683057 (Hartree/Particle)  
 Sum of electronic and zero-point Energies= -2425.318611 Hartree  
 Sum of electronic and thermal Enthalpies= -2425.270647 Hartree  
 Sum of electronic and thermal Free Energies= -2425.3989 Hartree

-----

| Center<br>Number | Atomic<br>Number | Coordinates(Angstroms) |            |            |
|------------------|------------------|------------------------|------------|------------|
|                  |                  | X                      | Y          | Z          |
| 1                | 6                | -3.4832960             | -1.0507050 | -0.0141420 |
| 2                | 6                | -4.7340670             | -0.6539510 | -0.5276250 |
| 3                | 7                | -2.7194550             | 0.0285040  | 0.2764120  |
| 4                | 6                | -4.7186050             | 0.7592810  | -0.5233450 |
| 5                | 6                | -3.4593790             | 1.1254840  | -0.0082210 |
| 6                | 6                | -2.8289370             | 2.4283920  | 0.1453020  |
| 7                | 6                | -3.4352370             | 3.6990960  | 0.4610750  |
| 8                | 7                | -1.5136930             | 2.5399350  | -0.0083380 |
| 9                | 6                | -2.4091580             | 4.6193190  | 0.4318420  |
| 10               | 6                | -1.2132380             | 3.8783760  | 0.1445070  |
| 11               | 6                | 0.0447260              | 4.4455460  | -0.0138490 |
| 12               | 1                | 0.0531080              | 5.5359170  | -0.0132420 |
| 13               | 6                | 1.2941610              | 3.8555160  | -0.1620510 |
| 14               | 6                | 2.5059810              | 4.5688250  | -0.4529700 |
| 15               | 7                | 1.5661470              | 2.5127570  | 0.0039590  |
| 16               | 6                | 3.5142500              | 3.6274590  | -0.4615630 |

|    |   |            |            |            |
|----|---|------------|------------|------------|
| 17 | 6 | 2.8794820  | 2.3720290  | -0.1409220 |
| 18 | 6 | 3.4805990  | 1.0555260  | 0.0152090  |
| 19 | 6 | 4.7302680  | 0.6620760  | 0.5335040  |
| 20 | 7 | 2.7184730  | -0.0252780 | -0.2729690 |
| 21 | 6 | 4.7159640  | -0.7511200 | 0.5359030  |
| 22 | 6 | 3.4586020  | -1.1207340 | 0.0184220  |
| 23 | 6 | 2.8303270  | -2.4246040 | -0.1342350 |
| 24 | 6 | 3.4399300  | -3.6951930 | -0.4438890 |
| 25 | 7 | 1.5133550  | -2.5370500 | 0.0048590  |
| 26 | 6 | 2.4125150  | -4.6153900 | -0.4322050 |
| 27 | 6 | 1.2142420  | -3.8752750 | -0.1516490 |
| 28 | 6 | -2.8815180 | -2.3674480 | 0.1353590  |
| 29 | 6 | -3.5162900 | -3.6261720 | 0.4430420  |
| 30 | 7 | -1.5671960 | -2.5060870 | -0.0052260 |
| 31 | 6 | -2.5075760 | -4.5668290 | 0.4283960  |
| 32 | 6 | -1.2949880 | -3.8503070 | 0.1482570  |
| 33 | 6 | -0.0462010 | -4.4407790 | -0.0023990 |
| 34 | 1 | -0.0573520 | -5.5306500 | -0.0034690 |
| 35 | 6 | -2.5107210 | 6.0832080  | 0.7391540  |
| 36 | 1 | -2.3075280 | 6.3123390  | 1.7966180  |
| 37 | 1 | -1.8003180 | 6.6762740  | 0.1502030  |
| 38 | 1 | -3.5151100 | 6.4662700  | 0.5181980  |
| 39 | 6 | -4.8499540 | 3.9467740  | 0.8956240  |
| 40 | 1 | -5.5003120 | 4.3494200  | 0.1039230  |
| 41 | 1 | -5.3076310 | 3.0128070  | 1.2349030  |
| 42 | 1 | -4.8900290 | 4.6612760  | 1.7303050  |
| 43 | 6 | -5.7604530 | 1.6438820  | -1.1425470 |
| 44 | 1 | -6.6151460 | 1.8762050  | -0.4849960 |
| 45 | 1 | -5.3274810 | 2.6011620  | -1.4497680 |
| 46 | 1 | -6.1867120 | 1.1790750  | -2.0439440 |
| 47 | 6 | -5.7952930 | -1.5103280 | -1.1535730 |
| 48 | 1 | -5.3823120 | -2.4712820 | -1.4764290 |
| 49 | 1 | -6.6511950 | -1.7357580 | -0.4952610 |
| 50 | 1 | -6.2165190 | -1.0246410 | -2.0462070 |
| 51 | 6 | -4.9387670 | -3.8466980 | 0.8615050  |
| 52 | 1 | -5.3759500 | -2.9108430 | 1.2222860  |
| 53 | 1 | -5.5939530 | -4.2148470 | 0.0576040  |
| 54 | 1 | -5.0006310 | -4.5831500 | 1.6767120  |
| 55 | 6 | -2.6523890 | -6.0346840 | 0.6945920  |
| 56 | 1 | -2.9837540 | -6.5996400 | -0.1910890 |
| 57 | 1 | -1.7106100 | -6.4832050 | 1.0279300  |
| 58 | 1 | -3.3973880 | -6.2260110 | 1.4795180  |
| 59 | 6 | 4.8580670  | -3.9438440 | -0.8612220 |
| 60 | 1 | 5.3148700  | -3.0163490 | -1.2192860 |
| 61 | 1 | 5.5045390  | -4.3272220 | -0.0573550 |
| 62 | 1 | 4.9056700  | -4.6796090 | -1.6780080 |
| 63 | 6 | 5.7572040  | -1.6308840 | 1.1629420  |
| 64 | 1 | 5.3233640  | -2.5839920 | 1.4816580  |
| 65 | 1 | 6.6103980  | -1.8720570 | 0.5067030  |
| 66 | 1 | 6.1854890  | -1.1565720 | 2.0583350  |
| 67 | 6 | 5.7891250  | 1.5236030  | 1.1563050  |

|    |    |            |            |            |
|----|----|------------|------------|------------|
| 68 | 1  | 6.6471980  | 1.7436910  | 0.4990030  |
| 69 | 1  | 5.3746020  | 2.4871510  | 1.4693580  |
| 70 | 1  | 6.2074590  | 1.0457860  | 2.0545650  |
| 71 | 6  | 2.6504210  | 6.0339220  | -0.7339800 |
| 72 | 1  | 1.7028150  | 6.4828580  | -1.0496490 |
| 73 | 1  | 3.0034910  | 6.6045220  | 0.1396170  |
| 74 | 1  | 3.3782400  | 6.2168620  | -1.5369850 |
| 75 | 6  | 4.9360790  | 3.8437780  | -0.8842370 |
| 76 | 1  | 5.5924710  | 4.2188380  | -0.0844320 |
| 77 | 1  | 5.3726070  | 2.9046170  | -1.2372570 |
| 78 | 1  | 4.9970170  | 4.5730980  | -1.7059390 |
| 79 | 6  | 2.5285160  | -6.0851780 | -0.7017860 |
| 80 | 1  | 2.8593230  | -6.6570250 | 0.1796540  |
| 81 | 1  | 1.5755090  | -6.5164750 | -1.0256930 |
| 82 | 1  | 3.2616180  | -6.2887840 | -1.4948720 |
| 83 | 8  | 0.1732430  | -0.0063200 | 1.8113030  |
| 84 | 8  | -0.1741690 | -0.0062110 | -1.8134070 |
| 85 | 92 | -0.0005680 | -0.0059900 | -0.0010270 |

-----

**NpO<sub>2</sub>L1<sup>3-</sup>**

E (CAM-B3LYP) = -2463.48378189 Hartree

Zero-point correction=

0.683622 (Hartree/Particle)

Sum of electronic and zero-point Energies=

-2462.800160 Hartree

Sum of electronic and thermal Enthalpies=

-2462.752485 Hartree

Sum of electronic and thermal Free Energies=

-2462.879764 Hartree

-----

| Center<br>Number | Atomic<br>Number | Coordinates(Angstroms) |           |           |
|------------------|------------------|------------------------|-----------|-----------|
|                  |                  | X                      | Y         | Z         |
| 1                | 7                | -2.705013              | -0.000766 | 0.267987  |
| 2                | 7                | -1.533312              | 2.522990  | 0.004126  |
| 3                | 7                | 1.531987               | 2.523765  | -0.004070 |
| 4                | 7                | 2.705091               | 0.000621  | -0.267922 |
| 5                | 7                | 1.533336               | -2.523210 | -0.004190 |
| 6                | 7                | -1.531923              | -2.524028 | 0.004030  |
| 7                | 6                | -3.459310              | -1.088039 | -0.014868 |
| 8                | 6                | -4.715755              | -0.707926 | -0.526717 |
| 9                | 6                | -4.716153              | 0.705093  | -0.526876 |
| 10               | 6                | -3.459951              | 1.086025  | -0.015042 |
| 11               | 6                | -2.848422              | 2.396127  | 0.140737  |
| 12               | 6                | -3.474946              | 3.658765  | 0.450978  |
| 13               | 6                | -2.459133              | 4.591396  | 0.438776  |
| 14               | 6                | -1.252529              | 3.865437  | 0.157929  |
| 15               | 6                | -0.001166              | 4.446597  | -0.000131 |
| 16               | 1                | -0.001406              | 5.536524  | -0.000302 |
| 17               | 6                | 1.250482               | 3.866044  | -0.158055 |
| 18               | 6                | 2.456673               | 4.592622  | -0.439020 |
| 19               | 6                | 3.473008               | 3.660562  | -0.451061 |
| 20               | 6                | 2.847155               | 2.397596  | -0.140663 |
| 21               | 6                | 3.459399               | 1.087831  | 0.015178  |
| 22               | 6                | 4.715743               | 0.707590  | 0.527188  |

|    |   |           |           |           |
|----|---|-----------|-----------|-----------|
| 23 | 6 | 4.716118  | -0.705429 | 0.527040  |
| 24 | 6 | 3.459954  | -1.086235 | 0.015019  |
| 25 | 6 | 2.848404  | -2.396313 | -0.140971 |
| 26 | 6 | 3.474907  | -3.658883 | -0.451631 |
| 27 | 6 | 2.459099  | -4.591515 | -0.439516 |
| 28 | 6 | 1.252538  | -3.865621 | -0.158304 |
| 29 | 6 | -2.847046 | -2.397800 | 0.140992  |
| 30 | 6 | -3.472864 | -3.660696 | 0.451631  |
| 31 | 6 | -2.456597 | -4.592834 | 0.439249  |
| 32 | 6 | -1.250430 | -3.866307 | 0.158007  |
| 33 | 6 | 0.001212  | -4.446834 | -0.000201 |
| 34 | 1 | 0.001517  | -5.536763 | -0.000289 |
| 35 | 6 | -2.592316 | 6.060001  | 0.706641  |
| 36 | 1 | -3.327002 | 6.255779  | 1.500279  |
| 37 | 1 | -1.644118 | 6.502896  | 1.029108  |
| 38 | 1 | -2.930828 | 6.627143  | -0.174961 |
| 39 | 6 | -4.894865 | 3.889747  | 0.872556  |
| 40 | 1 | -5.548767 | 4.266075  | 0.071361  |
| 41 | 1 | -5.339355 | 2.956575  | 1.231333  |
| 42 | 1 | -4.948714 | 4.624178  | 1.690224  |
| 43 | 6 | -5.768630 | 1.574706  | -1.149248 |
| 44 | 1 | -6.622823 | 1.805779  | -0.490639 |
| 45 | 1 | -5.346043 | 2.532847  | -1.467855 |
| 46 | 1 | -6.194173 | 1.097092  | -2.044238 |
| 47 | 6 | -5.767757 | -1.578291 | -1.148839 |
| 48 | 1 | -5.344628 | -2.536269 | -1.467221 |
| 49 | 1 | -6.621788 | -1.809696 | -0.490135 |
| 50 | 1 | -6.193615 | -1.101141 | -2.043927 |
| 51 | 6 | -4.892574 | -3.892265 | 0.873596  |
| 52 | 1 | -5.337407 | -2.959223 | 1.232289  |
| 53 | 1 | -5.546486 | -4.269043 | 0.072621  |
| 54 | 1 | -4.945903 | -4.626557 | 1.691422  |
| 55 | 6 | -2.588937 | -6.061485 | 0.707290  |
| 56 | 1 | -2.926453 | -6.629034 | -0.174435 |
| 57 | 1 | -1.640642 | -6.503659 | 1.030469  |
| 58 | 1 | -3.324020 | -6.257615 | 1.500467  |
| 59 | 6 | 4.894811  | -3.889655 | -0.873385 |
| 60 | 1 | 5.339156  | -2.956362 | -1.232031 |
| 61 | 1 | 5.548826  | -4.266038 | -0.072313 |
| 62 | 1 | 4.948685  | -4.623924 | -1.691194 |
| 63 | 6 | 5.768498  | -1.575221 | 1.149321  |
| 64 | 1 | 5.345830  | -2.533411 | 1.467677  |
| 65 | 1 | 6.622736  | -1.806194 | 0.490735  |
| 66 | 1 | 6.193988  | -1.097828 | 2.044455  |
| 67 | 6 | 5.767668  | 1.577766  | 1.149703  |
| 68 | 1 | 6.621735  | 1.809451  | 0.491146  |
| 69 | 1 | 5.344491  | 2.535611  | 1.468426  |
| 70 | 1 | 6.193477  | 1.100289  | 2.044638  |
| 71 | 6 | 2.588858  | 6.061330  | -0.706843 |
| 72 | 1 | 1.641376  | 6.502754  | -1.033454 |
| 73 | 1 | 2.922764  | 6.629297  | 0.175988  |



|    |    |           |           |           |
|----|----|-----------|-----------|-----------|
| 74 | 1  | 3.326620  | 6.257822  | -1.497411 |
| 75 | 6  | 4.892851  | 3.892102  | -0.872607 |
| 76 | 1  | 5.546632  | 4.268542  | -0.071375 |
| 77 | 1  | 5.337635  | 2.959103  | -1.231473 |
| 78 | 1  | 4.946479  | 4.626615  | -1.690209 |
| 79 | 6  | 2.592139  | -6.060091 | -0.707632 |
| 80 | 1  | 2.928402  | -6.627751 | 0.174501  |
| 81 | 1  | 1.644420  | -6.502397 | -1.032336 |
| 82 | 1  | 3.328474  | -6.255899 | -1.499715 |
| 83 | 93 | -0.000010 | 0.000305  | -0.000024 |
| 84 | 8  | 0.201938  | 0.000006  | 1.780151  |
| 85 | 8  | -0.201957 | 0.000633  | -1.780204 |

**PuO<sub>2</sub>Li<sup>3-</sup>**

E (CAM-B3LYP) = -2502.89467314 Hartree

Zero-point correction=

0.683144 (Hartree/Particle)

Sum of electronic and zero-point Energies=

-2502.211530 Hartree

Sum of electronic and thermal Enthalpies=

-2502.163686 Hartree

Sum of electronic and thermal Free Energies=

-2502.292021 Hartree

| Center<br>Number | Atomic<br>Number | Coordinates(Angstroms) |          |          |
|------------------|------------------|------------------------|----------|----------|
|                  |                  | X                      | Y        | Z        |
| 1                | 6                | -3.45383               | -0.97225 | -0.03946 |
| 2                | 6                | -4.69205               | -0.55349 | -0.54956 |
| 3                | 7                | -2.64763               | 0.09656  | 0.23164  |
| 4                | 6                | -4.64680               | 0.85925  | -0.55850 |
| 5                | 6                | -3.37990               | 1.20473  | -0.05742 |
| 6                | 6                | -2.75787               | 2.50560  | 0.11837  |
| 7                | 6                | -3.35641               | 3.75878  | 0.47830  |
| 8                | 7                | -1.43560               | 2.61052  | -0.06160 |
| 9                | 6                | -2.33233               | 4.68368  | 0.45491  |
| 10               | 6                | -1.14209               | 3.95497  | 0.12787  |
| 11               | 6                | 0.11606                | 4.51560  | -0.03285 |
| 12               | 1                | 0.14529                | 5.60685  | -0.04471 |
| 13               | 6                | 1.34842                | 3.89203  | -0.17415 |
| 14               | 6                | 2.57840                | 4.55589  | -0.48927 |
| 15               | 7                | 1.57179                | 2.53771  | 0.03812  |
| 16               | 6                | 3.55662                | 3.58263  | -0.47768 |
| 17               | 6                | 2.88444                | 2.36519  | -0.11104 |
| 18               | 6                | 3.44094                | 1.03538  | 0.07853  |
| 19               | 6                | 4.67330                | 0.62622  | 0.61004  |
| 20               | 7                | 2.65445                | -0.03402 | -0.22187 |
| 21               | 6                | 4.64655                | -0.78710 | 0.60085  |
| 22               | 6                | 3.39482                | -1.14224 | 0.06916  |
| 23               | 6                | 2.77146                | -2.43275 | -0.12040 |
| 24               | 6                | 3.37127                | -3.69198 | -0.45891 |
| 25               | 7                | 1.44268                | -2.52857 | 0.00996  |
| 26               | 6                | 2.33574                | -4.60466 | -0.47949 |
| 27               | 6                | 1.14596                | -3.86974 | -0.18340 |
| 28               | 6                | -2.88953               | -2.29418 | 0.12695  |

|    |   |          |          |          |
|----|---|----------|----------|----------|
| 29 | 6 | -3.55139 | -3.52443 | 0.45909  |
| 30 | 7 | -1.57399 | -2.45710 | -0.02517 |
| 31 | 6 | -2.56624 | -4.49129 | 0.44084  |
| 32 | 6 | -1.34016 | -3.81497 | 0.13696  |
| 33 | 6 | -0.11218 | -4.43895 | -0.03271 |
| 34 | 1 | -0.13833 | -5.52111 | -0.04420 |
| 35 | 6 | -2.44786 | 6.13800  | 0.79096  |
| 36 | 1 | -2.64545 | 6.29336  | 1.86103  |
| 37 | 1 | -1.53786 | 6.69695  | 0.55217  |
| 38 | 1 | -3.27644 | 6.61008  | 0.24544  |
| 39 | 6 | -4.76388 | 4.01813  | 0.93300  |
| 40 | 1 | -5.40233 | 4.45841  | 0.15698  |
| 41 | 1 | -5.24798 | 3.09505  | 1.25990  |
| 42 | 1 | -4.77044 | 4.71293  | 1.78378  |
| 43 | 6 | -5.69755 | 1.76001  | -1.13887 |
| 44 | 1 | -6.52910 | 1.96555  | -0.45597 |
| 45 | 1 | -5.27674 | 2.73147  | -1.42905 |
| 46 | 1 | -6.13684 | 1.31982  | -2.04029 |
| 47 | 6 | -5.79640 | -1.38986 | -1.13010 |
| 48 | 1 | -5.43470 | -2.37205 | -1.42981 |
| 49 | 1 | -6.63727 | -1.55290 | -0.43798 |
| 50 | 1 | -6.22145 | -0.90897 | -2.02215 |
| 51 | 6 | -4.97090 | -3.73014 | 0.89482  |
| 52 | 1 | -5.41676 | -2.79263 | 1.24034  |
| 53 | 1 | -5.62108 | -4.11877 | 0.10003  |
| 54 | 1 | -5.02308 | -4.45136 | 1.71774  |
| 55 | 6 | -2.75602 | -5.94698 | 0.74482  |
| 56 | 1 | -3.53239 | -6.39273 | 0.11436  |
| 57 | 1 | -1.83730 | -6.52449 | 0.60097  |
| 58 | 1 | -3.07028 | -6.09816 | 1.78660  |
| 59 | 6 | 4.79059  | -3.95860 | -0.85984 |
| 60 | 1 | 5.27916  | -3.04346 | -1.20357 |
| 61 | 1 | 5.40836  | -4.36440 | -0.05030 |
| 62 | 1 | 4.83389  | -4.68435 | -1.68067 |
| 63 | 6 | 5.69485  | -1.68370 | 1.20197  |
| 64 | 1 | 5.27100  | -2.64235 | 1.50745  |
| 65 | 1 | 6.53011  | -1.89752 | 0.52738  |
| 66 | 1 | 6.12866  | -1.22077 | 2.09697  |
| 67 | 6 | 5.75673  | 1.46869  | 1.21092  |
| 68 | 1 | 6.61086  | 1.63945  | 0.53618  |
| 69 | 1 | 5.38242  | 2.45687  | 1.49793  |
| 70 | 1 | 6.16705  | 1.00279  | 2.11053  |
| 71 | 6 | 2.76643  | 6.00442  | -0.81819 |
| 72 | 1 | 1.82205  | 6.51381  | -1.01949 |
| 73 | 1 | 3.26928  | 6.54799  | -0.00524 |
| 74 | 1 | 3.39504  | 6.13122  | -1.70899 |
| 75 | 6 | 4.98721  | 3.75776  | -0.89721 |
| 76 | 1 | 5.63451  | 4.14043  | -0.09701 |
| 77 | 1 | 5.41876  | 2.80975  | -1.23160 |
| 78 | 1 | 5.05816  | 4.47121  | -1.72738 |
| 79 | 6 | 2.44958  | -6.07015 | -0.78032 |

|    |    |          |          |          |
|----|----|----------|----------|----------|
| 80 | 1  | 2.85327  | -6.63594 | 0.06853  |
| 81 | 1  | 1.48066  | -6.51321 | -1.03388 |
| 82 | 1  | 3.12332  | -6.24868 | -1.62685 |
| 83 | 8  | 0.13215  | -0.09552 | 1.77753  |
| 84 | 8  | -0.14244 | -0.09190 | -1.79244 |
| 85 | 94 | -0.00416 | -0.09610 | -0.00731 |

-----

**UO<sub>2</sub>L2**

E (CAM-B3LYP) = -2315.65275156 Hartree  
 Zero-point correction= 0.676786 (Hartree/Particle)  
 Sum of electronic and zero-point Energies= -2314.975966 Hartree  
 Sum of electronic and thermal Enthalpies= -2314.931962 Hartree  
 Sum of electronic and thermal Free Energies= -2315.052294 Hartree

-----

| Center<br>Number | Atomic<br>Number | Coordinates(Angstroms) |          |           |
|------------------|------------------|------------------------|----------|-----------|
|                  |                  | X                      | Y        | Z         |
| 1                | 6                | -1.011956              | 2.934507 | -0.165079 |
| 2                | 6                | -1.991119              | 3.876613 | -0.627904 |
| 3                | 6                | -3.134079              | 3.145143 | -0.855113 |
| 4                | 6                | -2.824513              | 1.779701 | -0.530124 |
| 5                | 7                | -1.516229              | 1.681775 | -0.145305 |
| 6                | 6                | 0.359060               | 3.068346 | 0.201665  |
| 7                | 6                | 1.122284               | 4.166243 | 0.724932  |
| 8                | 7                | 1.110790               | 1.949297 | 0.123667  |
| 9                | 6                | 2.390263               | 3.673857 | 0.931128  |
| 10               | 6                | 2.369271               | 2.292787 | 0.533518  |
| 11               | 6                | -1.805777              | 5.331909 | -0.937714 |
| 12               | 1                | -1.973985              | 5.978940 | -0.070429 |
| 13               | 1                | -0.798002              | 5.533671 | -1.307699 |
| 14               | 1                | -2.506011              | 5.646578 | -1.716186 |
| 15               | 6                | 0.641576               | 5.534097 | 1.106922  |
| 16               | 1                | 0.667957               | 6.245312 | 0.274760  |
| 17               | 1                | -0.384175              | 5.504398 | 1.481446  |
| 18               | 1                | 1.266017               | 5.946060 | 1.904188  |
| 19               | 6                | -4.440152              | 3.640937 | -1.399583 |
| 20               | 6                | -4.580768              | 3.413871 | -2.910612 |
| 21               | 1                | -4.546135              | 4.708067 | -1.179852 |
| 22               | 1                | -5.271085              | 3.147369 | -0.882108 |
| 23               | 1                | -5.544536              | 3.783243 | -3.275447 |
| 24               | 1                | -3.787527              | 3.931869 | -3.458395 |
| 25               | 1                | -4.506661              | 2.349749 | -3.153796 |
| 26               | 6                | 3.564917               | 4.397616 | 1.518356  |
| 27               | 6                | 3.742848               | 4.127120 | 3.018282  |
| 28               | 1                | 3.451153               | 5.473660 | 1.352845  |
| 29               | 1                | 4.481225               | 4.111228 | 0.989138  |
| 30               | 1                | 3.886298               | 3.059160 | 3.207570  |
| 31               | 1                | 4.609559               | 4.665761 | 3.414528  |
| 32               | 1                | 2.858444               | 4.444233 | 3.579448  |
| 33               | 6                | -3.741077              | 0.745871 | -0.458910 |
| 34               | 1                | -4.770641              | 1.021401 | -0.662566 |

|    |    |           |           |           |
|----|----|-----------|-----------|-----------|
| 35 | 6  | -3.555963 | -0.570681 | -0.057320 |
| 36 | 6  | -4.667626 | -1.409576 | 0.301721  |
| 37 | 7  | -2.362603 | -1.238455 | 0.124029  |
| 38 | 6  | -4.136907 | -2.591287 | 0.740165  |
| 39 | 6  | -2.708391 | -2.469263 | 0.575076  |
| 40 | 6  | -1.886736 | -3.610276 | 0.690991  |
| 41 | 1  | -2.404000 | -4.503057 | 1.023189  |
| 42 | 6  | -0.623531 | -3.888748 | 0.270699  |
| 43 | 6  | -0.077144 | -5.178778 | 0.039150  |
| 44 | 8  | 0.298917  | -2.948059 | -0.175443 |
| 45 | 6  | 1.104784  | -5.028243 | -0.608749 |
| 46 | 1  | -0.581138 | -6.097720 | 0.302649  |
| 47 | 1  | 1.777143  | -5.799010 | -0.957739 |
| 48 | 6  | 1.384798  | -3.639344 | -0.703227 |
| 49 | 6  | 2.567582  | -3.076406 | -1.068766 |
| 50 | 1  | 3.254634  | -3.810604 | -1.473597 |
| 51 | 6  | 3.140450  | -1.809472 | -0.828927 |
| 52 | 6  | 4.566494  | -1.631719 | -0.946249 |
| 53 | 7  | 2.542411  | -0.708263 | -0.311285 |
| 54 | 6  | 4.837332  | -0.403464 | -0.409844 |
| 55 | 6  | 3.477997  | 1.472295  | 0.432091  |
| 56 | 6  | 3.571790  | 0.170734  | -0.044093 |
| 57 | 1  | 4.426784  | 1.937432  | 0.679100  |
| 58 | 6  | 6.172005  | 0.257898  | -0.255491 |
| 59 | 1  | 6.242544  | 1.176907  | -0.847549 |
| 60 | 1  | 6.371707  | 0.526420  | 0.787896  |
| 61 | 1  | 6.978618  | -0.403694 | -0.579820 |
| 62 | 6  | 5.549797  | -2.634852 | -1.476293 |
| 63 | 6  | 6.054941  | -3.615620 | -0.409987 |
| 64 | 1  | 6.405472  | -2.103244 | -1.905942 |
| 65 | 1  | 5.108588  | -3.193185 | -2.309689 |
| 66 | 1  | 6.767053  | -4.329652 | -0.836284 |
| 67 | 1  | 6.554781  | -3.080181 | 0.402923  |
| 68 | 1  | 5.227866  | -4.180360 | 0.031351  |
| 69 | 6  | -4.864071 | -3.782726 | 1.290738  |
| 70 | 6  | -4.756501 | -3.901634 | 2.816365  |
| 71 | 1  | -4.493664 | -4.704589 | 0.825972  |
| 72 | 1  | -5.920350 | -3.721190 | 1.010805  |
| 73 | 1  | -5.300041 | -4.778625 | 3.182373  |
| 74 | 1  | -3.713030 | -3.989929 | 3.134190  |
| 75 | 1  | -5.172461 | -3.014376 | 3.302960  |
| 76 | 6  | -6.109007 | -1.009319 | 0.237692  |
| 77 | 1  | -6.765223 | -1.859366 | 0.437628  |
| 78 | 1  | -6.347992 | -0.232213 | 0.972265  |
| 79 | 1  | -6.376185 | -0.617472 | -0.749612 |
| 80 | 92 | 0.015656  | -0.264388 | -0.078173 |
| 81 | 8  | -0.070738 | -0.283878 | -1.822682 |
| 82 | 8  | 0.115428  | -0.381632 | 1.661947  |

-----  
**NpO<sub>2</sub>L2**

E (CAM-B3LYP) = -2353.09020516 Hartree  
 Zero-point correction= 0.674264 (Hartree/Particle)  
 Sum of electronic and zero-point Energies= -2352.415941 Hartree  
 Sum of electronic and thermal Enthalpies= -2352.371427 Hartree  
 Sum of electronic and thermal Free Energies= -2352.493878 Hartree

| Center<br>Number | Atomic<br>Number | Coordinates(Angstroms) |           |           |
|------------------|------------------|------------------------|-----------|-----------|
|                  |                  | X                      | Y         | Z         |
| 1                | 6                | -1.166368              | 2.875186  | -0.293526 |
| 2                | 6                | -2.202981              | 3.787900  | -0.773366 |
| 3                | 6                | -3.317421              | 3.021203  | -0.936463 |
| 4                | 6                | -2.941834              | 1.661804  | -0.564242 |
| 5                | 7                | -1.609919              | 1.633192  | -0.209190 |
| 6                | 6                | 0.229720               | 3.098898  | 0.029046  |
| 7                | 6                | 0.933979               | 4.279472  | 0.515462  |
| 8                | 7                | 1.035692               | 2.053152  | -0.063943 |
| 9                | 6                | 2.233414               | 3.892062  | 0.666079  |
| 10               | 6                | 2.292410               | 2.487113  | 0.289135  |
| 11               | 6                | -2.057046              | 5.232175  | -1.139126 |
| 12               | 1                | -2.194318              | 5.903578  | -0.285723 |
| 13               | 1                | -1.071033              | 5.436605  | -1.563936 |
| 14               | 1                | -2.801500              | 5.509753  | -1.890450 |
| 15               | 6                | 0.358444               | 5.605928  | 0.909387  |
| 16               | 1                | 0.272066               | 6.301042  | 0.068286  |
| 17               | 1                | -0.637190              | 5.492917  | 1.346190  |
| 18               | 1                | 0.990091               | 6.084306  | 1.662335  |
| 19               | 6                | -4.678264              | 3.454477  | -1.388355 |
| 20               | 6                | -5.593046              | 3.855252  | -0.222829 |
| 21               | 1                | -5.151540              | 2.653536  | -1.966459 |
| 22               | 1                | -4.581470              | 4.302380  | -2.074873 |
| 23               | 1                | -6.578540              | 4.162056  | -0.586874 |
| 24               | 1                | -5.730550              | 3.022493  | 0.473756  |
| 25               | 1                | -5.162661              | 4.688533  | 0.340490  |
| 26               | 6                | 3.378560               | 4.699224  | 1.198514  |
| 27               | 6                | 3.643145               | 4.447407  | 2.689147  |
| 28               | 1                | 3.181016               | 5.763723  | 1.037792  |
| 29               | 1                | 4.286830               | 4.476053  | 0.626434  |
| 30               | 1                | 3.863677               | 3.392286  | 2.875275  |
| 31               | 1                | 4.490641               | 5.043300  | 3.042301  |
| 32               | 1                | 2.767211               | 4.709868  | 3.290159  |
| 33               | 6                | -3.794577              | 0.599064  | -0.507075 |
| 34               | 1                | -4.832427              | 0.822902  | -0.732119 |
| 35               | 6                | -3.558302              | -0.757054 | -0.146014 |
| 36               | 6                | -4.670485              | -1.648591 | 0.151932  |
| 37               | 7                | -2.377703              | -1.380175 | -0.040707 |
| 38               | 6                | -4.117819              | -2.851008 | 0.459343  |
| 39               | 6                | -2.675851              | -2.678316 | 0.299335  |
| 40               | 6                | -1.823431              | -3.760372 | 0.368128  |
| 41               | 1                | -2.318113              | -4.698299 | 0.598355  |
| 42               | 6                | -0.467016              | -3.984587 | 0.113891  |
| 43               | 6                | 0.139093               | -5.234993 | 0.004174  |
| 44               | 8                | 0.475571               | -3.017944 | -0.139407 |

|    |    |           |           |           |
|----|----|-----------|-----------|-----------|
| 45 | 6  | 1.458030  | -5.028403 | -0.348920 |
| 46 | 1  | -0.368772 | -6.176668 | 0.154286  |
| 47 | 1  | 2.223018  | -5.770821 | -0.524410 |
| 48 | 6  | 1.664033  | -3.651004 | -0.416691 |
| 49 | 6  | 2.891496  | -3.024561 | -0.644497 |
| 50 | 1  | 3.648330  | -3.764251 | -0.883929 |
| 51 | 6  | 3.377808  | -1.734332 | -0.543908 |
| 52 | 6  | 4.806116  | -1.463774 | -0.669525 |
| 53 | 7  | 2.692525  | -0.589798 | -0.226955 |
| 54 | 6  | 4.961226  | -0.147302 | -0.369756 |
| 55 | 6  | 3.432405  | 1.733077  | 0.228036  |
| 56 | 6  | 3.626392  | 0.369486  | -0.110374 |
| 57 | 1  | 4.351697  | 2.269660  | 0.441589  |
| 58 | 6  | 6.225676  | 0.652010  | -0.320981 |
| 59 | 1  | 6.191145  | 1.508996  | -1.002459 |
| 60 | 1  | 6.420018  | 1.043459  | 0.684508  |
| 61 | 1  | 7.088095  | 0.043417  | -0.603069 |
| 62 | 6  | 5.873208  | -2.467518 | -0.991508 |
| 63 | 6  | 6.376992  | -3.231850 | 0.240066  |
| 64 | 1  | 6.717386  | -1.953757 | -1.462933 |
| 65 | 1  | 5.509195  | -3.178355 | -1.742125 |
| 66 | 1  | 7.151640  | -3.954233 | -0.036207 |
| 67 | 1  | 6.800293  | -2.542504 | 0.976649  |
| 68 | 1  | 5.563099  | -3.774699 | 0.730475  |
| 69 | 6  | -4.811481 | -4.104520 | 0.900818  |
| 70 | 6  | -4.721194 | -4.337274 | 2.414861  |
| 71 | 1  | -4.399982 | -4.972642 | 0.372085  |
| 72 | 1  | -5.864609 | -4.056595 | 0.606893  |
| 73 | 1  | -5.236867 | -5.259461 | 2.700723  |
| 74 | 1  | -3.680172 | -4.411474 | 2.743200  |
| 75 | 1  | -5.178080 | -3.506855 | 2.961085  |
| 76 | 6  | -6.115518 | -1.259628 | 0.136503  |
| 77 | 1  | -6.757870 | -2.112466 | 0.367316  |
| 78 | 1  | -6.332979 | -0.477626 | 0.872686  |
| 79 | 1  | -6.422215 | -0.877153 | -0.843810 |
| 80 | 8  | 0.027619  | -0.366350 | -1.924948 |
| 81 | 8  | 0.106074  | -0.359234 | 1.645779  |
| 82 | 93 | 0.060108  | -0.317519 | -0.139780 |

**PuO<sub>2</sub>L2**

E (CAM-B3LYP) = -2392.53250985 Hartree  
 Zero-point correction= 0.674534 (Hartree/Particle)  
 Sum of electronic and zero-point Energies= -2391.857976 Hartree  
 Sum of electronic and thermal Enthalpies= -2391.813579 Hartree  
 Sum of electronic and thermal Free Energies= -2391.936105 Hartree

| Center<br>Number | Atomic<br>Number | Coordinates(Angstroms) |          |           |
|------------------|------------------|------------------------|----------|-----------|
|                  |                  | X                      | Y        | Z         |
| 1                | 6                | -1.177001              | 2.862081 | -0.300810 |
| 2                | 6                | -2.211949              | 3.769010 | -0.796591 |

|    |   |           |           |           |
|----|---|-----------|-----------|-----------|
| 3  | 6 | -3.320765 | 2.996704  | -0.969394 |
| 4  | 6 | -2.942803 | 1.640536  | -0.585838 |
| 5  | 7 | -1.615414 | 1.619937  | -0.214991 |
| 6  | 6 | 0.215324  | 3.091432  | 0.035246  |
| 7  | 6 | 0.906710  | 4.274223  | 0.534932  |
| 8  | 7 | 1.027085  | 2.050769  | -0.053993 |
| 9  | 6 | 2.206107  | 3.893330  | 0.700128  |
| 10 | 6 | 2.277063  | 2.490805  | 0.315919  |
| 11 | 6 | -2.067260 | 5.212832  | -1.164518 |
| 12 | 1 | -2.217427 | 5.885811  | -0.314466 |
| 13 | 1 | -1.076784 | 5.420123  | -1.577579 |
| 14 | 1 | -2.803599 | 5.485769  | -1.925539 |
| 15 | 6 | 0.317429  | 5.595821  | 0.924613  |
| 16 | 1 | 0.236648  | 6.291916  | 0.083724  |
| 17 | 1 | -0.682915 | 5.475116  | 1.348579  |
| 18 | 1 | 0.936281  | 6.077202  | 1.686251  |
| 19 | 6 | -4.678385 | 3.421423  | -1.438702 |
| 20 | 6 | -5.606983 | 3.827721  | -0.286118 |
| 21 | 1 | -5.142651 | 2.614244  | -2.015471 |
| 22 | 1 | -4.577446 | 4.264431  | -2.130731 |
| 23 | 1 | -6.589667 | 4.128173  | -0.662890 |
| 24 | 1 | -5.748983 | 2.999767  | 0.415298  |
| 25 | 1 | -5.185600 | 4.666819  | 0.275380  |
| 26 | 6 | 3.340815  | 4.703638  | 1.249778  |
| 27 | 6 | 3.591879  | 4.442990  | 2.741203  |
| 28 | 1 | 3.138549  | 5.768070  | 1.094468  |
| 29 | 1 | 4.256251  | 4.489791  | 0.685550  |
| 30 | 1 | 3.817054  | 3.387934  | 2.922113  |
| 31 | 1 | 4.432088  | 5.041491  | 3.107169  |
| 32 | 1 | 2.708271  | 4.695896  | 3.335042  |
| 33 | 6 | -3.789555 | 0.573396  | -0.528735 |
| 34 | 1 | -4.827121 | 0.788014  | -0.764173 |
| 35 | 6 | -3.545899 | -0.777227 | -0.151397 |
| 36 | 6 | -4.653757 | -1.669482 | 0.160557  |
| 37 | 7 | -2.362138 | -1.393445 | -0.039416 |
| 38 | 6 | -4.095203 | -2.864696 | 0.485017  |
| 39 | 6 | -2.654587 | -2.687638 | 0.318855  |
| 40 | 6 | -1.796942 | -3.765071 | 0.392903  |
| 41 | 1 | -2.284202 | -4.703907 | 0.635031  |
| 42 | 6 | -0.442266 | -3.981379 | 0.124906  |
| 43 | 6 | 0.169111  | -5.228611 | 0.006346  |
| 44 | 8 | 0.490711  | -3.008842 | -0.140803 |
| 45 | 6 | 1.481044  | -5.014373 | -0.366860 |
| 46 | 1 | -0.331592 | -6.173055 | 0.163080  |
| 47 | 1 | 2.247805  | -5.752051 | -0.554269 |
| 48 | 6 | 1.678121  | -3.635496 | -0.435370 |
| 49 | 6 | 2.899620  | -3.002344 | -0.673543 |
| 50 | 1 | 3.657662  | -3.736074 | -0.927100 |
| 51 | 6 | 3.379476  | -1.710641 | -0.562645 |
| 52 | 6 | 4.806243  | -1.432707 | -0.690223 |
| 53 | 7 | 2.689953  | -0.574353 | -0.226748 |

|    |    |           |           |           |
|----|----|-----------|-----------|-----------|
| 54 | 6  | 4.957150  | -0.120651 | -0.369639 |
| 55 | 6  | 3.421413  | 1.744420  | 0.256738  |
| 56 | 6  | 3.620861  | 0.386097  | -0.098916 |
| 57 | 1  | 4.337103  | 2.282441  | 0.482076  |
| 58 | 6  | 6.218406  | 0.683188  | -0.312070 |
| 59 | 1  | 6.178575  | 1.550307  | -0.980334 |
| 60 | 1  | 6.413818  | 1.060278  | 0.698704  |
| 61 | 1  | 7.082638  | 0.082564  | -0.605574 |
| 62 | 6  | 5.876281  | -2.427032 | -1.031265 |
| 63 | 6  | 6.389587  | -3.206087 | 0.187049  |
| 64 | 1  | 6.715873  | -1.902882 | -1.499505 |
| 65 | 1  | 5.511875  | -3.129079 | -1.789928 |
| 66 | 1  | 7.165994  | -3.921227 | -0.102881 |
| 67 | 1  | 6.813531  | -2.525099 | 0.931016  |
| 68 | 1  | 5.580439  | -3.759180 | 0.673849  |
| 69 | 6  | -4.781749 | -4.115166 | 0.945735  |
| 70 | 6  | -4.681906 | -4.329243 | 2.461908  |
| 71 | 1  | -4.369902 | -4.988208 | 0.425357  |
| 72 | 1  | -5.836730 | -4.074740 | 0.657335  |
| 73 | 1  | -5.192750 | -5.249599 | 2.762035  |
| 74 | 1  | -3.638708 | -4.396007 | 2.784885  |
| 75 | 1  | -5.138391 | -3.493739 | 3.000680  |
| 76 | 6  | -6.100533 | -1.287087 | 0.141629  |
| 77 | 1  | -6.738850 | -2.139463 | 0.385079  |
| 78 | 1  | -6.320560 | -0.495818 | 0.867077  |
| 79 | 1  | -6.410190 | -0.919555 | -0.843485 |
| 80 | 8  | 0.025095  | -0.345275 | -1.899722 |
| 81 | 8  | 0.099492  | -0.336820 | 1.624128  |
| 82 | 94 | 0.059088  | -0.315081 | -0.138017 |

## UO<sub>2</sub>L<sub>2</sub><sup>-</sup>

E (CAM-B3LYP) = -2315.70603278 Hartree

Zero-point correction=

0.672735 (Hartree/Particle)

Sum of electronic and zero-point Energies=

-2315.033298 Hartree

Sum of electronic and thermal Enthalpies=

-2314.988988 Hartree

Sum of electronic and thermal Free Energies=

-2315.110278 Hartree

| Center<br>Number | Atomic<br>Number | Coordinates(Angstroms) |          |           |
|------------------|------------------|------------------------|----------|-----------|
|                  |                  | X                      | Y        | Z         |
| 1                | 6                | -1.011956              | 2.934507 | -0.165079 |
| 2                | 6                | -1.991119              | 3.876613 | -0.627904 |
| 3                | 6                | -3.134079              | 3.145143 | -0.855113 |
| 4                | 6                | -2.824513              | 1.779701 | -0.530124 |
| 5                | 7                | -1.516229              | 1.681775 | -0.145305 |
| 6                | 6                | 0.359060               | 3.068346 | 0.201665  |
| 7                | 6                | 1.122284               | 4.166243 | 0.724932  |
| 8                | 7                | 1.110790               | 1.949297 | 0.123667  |
| 9                | 6                | 2.390263               | 3.673857 | 0.931128  |
| 10               | 6                | 2.369271               | 2.292787 | 0.533518  |
| 11               | 6                | -1.805777              | 5.331909 | -0.937714 |



|    |   |           |           |           |
|----|---|-----------|-----------|-----------|
| 12 | 1 | -1.973985 | 5.978940  | -0.070429 |
| 13 | 1 | -0.798002 | 5.533671  | -1.307699 |
| 14 | 1 | -2.506011 | 5.646578  | -1.716186 |
| 15 | 6 | 0.641576  | 5.534097  | 1.106922  |
| 16 | 1 | 0.667957  | 6.245312  | 0.274760  |
| 17 | 1 | -0.384175 | 5.504398  | 1.481446  |
| 18 | 1 | 1.266017  | 5.946060  | 1.904188  |
| 19 | 6 | -4.440152 | 3.640937  | -1.399583 |
| 20 | 6 | -4.580768 | 3.413871  | -2.910612 |
| 21 | 1 | -4.546135 | 4.708067  | -1.179852 |
| 22 | 1 | -5.271085 | 3.147369  | -0.882108 |
| 23 | 1 | -5.544536 | 3.783243  | -3.275447 |
| 24 | 1 | -3.787527 | 3.931869  | -3.458395 |
| 25 | 1 | -4.506661 | 2.349749  | -3.153796 |
| 26 | 6 | 3.564917  | 4.397616  | 1.518356  |
| 27 | 6 | 3.742848  | 4.127120  | 3.018282  |
| 28 | 1 | 3.451153  | 5.473660  | 1.352845  |
| 29 | 1 | 4.481225  | 4.111228  | 0.989138  |
| 30 | 1 | 3.886298  | 3.059160  | 3.207570  |
| 31 | 1 | 4.609559  | 4.665761  | 3.414528  |
| 32 | 1 | 2.858444  | 4.444233  | 3.579448  |
| 33 | 6 | -3.741077 | 0.745871  | -0.458910 |
| 34 | 1 | -4.770641 | 1.021401  | -0.662566 |
| 35 | 6 | -3.555963 | -0.570681 | -0.057320 |
| 36 | 6 | -4.667626 | -1.409576 | 0.301721  |
| 37 | 7 | -2.362603 | -1.238455 | 0.124029  |
| 38 | 6 | -4.136907 | -2.591287 | 0.740165  |
| 39 | 6 | -2.708391 | -2.469263 | 0.575076  |
| 40 | 6 | -1.886736 | -3.610276 | 0.690991  |
| 41 | 1 | -2.404000 | -4.503057 | 1.023189  |
| 42 | 6 | -0.623531 | -3.888748 | 0.270699  |
| 43 | 6 | -0.077144 | -5.178778 | 0.039150  |
| 44 | 8 | 0.298917  | -2.948059 | -0.175443 |
| 45 | 6 | 1.104784  | -5.028243 | -0.608749 |
| 46 | 1 | -0.581138 | -6.097720 | 0.302649  |
| 47 | 1 | 1.777143  | -5.799010 | -0.957739 |
| 48 | 6 | 1.384798  | -3.639344 | -0.703227 |
| 49 | 6 | 2.567582  | -3.076406 | -1.068766 |
| 50 | 1 | 3.254634  | -3.810604 | -1.473597 |
| 51 | 6 | 3.140450  | -1.809472 | -0.828927 |
| 52 | 6 | 4.566494  | -1.631719 | -0.946249 |
| 53 | 7 | 2.542411  | -0.708263 | -0.311285 |
| 54 | 6 | 4.837332  | -0.403464 | -0.409844 |
| 55 | 6 | 3.477997  | 1.472295  | 0.432091  |
| 56 | 6 | 3.571790  | 0.170734  | -0.044093 |
| 57 | 1 | 4.426784  | 1.937432  | 0.679100  |
| 58 | 6 | 6.172005  | 0.257898  | -0.255491 |
| 59 | 1 | 6.242544  | 1.176907  | -0.847549 |
| 60 | 1 | 6.371707  | 0.526420  | 0.787896  |
| 61 | 1 | 6.978618  | -0.403694 | -0.579820 |
| 62 | 6 | 5.549797  | -2.634852 | -1.476293 |

|    |    |           |           |           |
|----|----|-----------|-----------|-----------|
| 63 | 6  | 6.054941  | -3.615620 | -0.409987 |
| 64 | 1  | 6.405472  | -2.103244 | -1.905942 |
| 65 | 1  | 5.108588  | -3.193185 | -2.309689 |
| 66 | 1  | 6.767053  | -4.329652 | -0.836284 |
| 67 | 1  | 6.554781  | -3.080181 | 0.402923  |
| 68 | 1  | 5.227866  | -4.180360 | 0.031351  |
| 69 | 6  | -4.864071 | -3.782726 | 1.290738  |
| 70 | 6  | -4.756501 | -3.901634 | 2.816365  |
| 71 | 1  | -4.493664 | -4.704589 | 0.825972  |
| 72 | 1  | -5.920350 | -3.721190 | 1.010805  |
| 73 | 1  | -5.300041 | -4.778625 | 3.182373  |
| 74 | 1  | -3.713030 | -3.989929 | 3.134190  |
| 75 | 1  | -5.172461 | -3.014376 | 3.302960  |
| 76 | 6  | -6.109007 | -1.009319 | 0.237692  |
| 77 | 1  | -6.765223 | -1.859366 | 0.437628  |
| 78 | 1  | -6.347992 | -0.232213 | 0.972265  |
| 79 | 1  | -6.376185 | -0.617472 | -0.749612 |
| 80 | 92 | 0.015656  | -0.264388 | -0.078173 |
| 81 | 8  | -0.070738 | -0.283878 | -1.822682 |
| 82 | 8  | 0.115428  | -0.381632 | 1.661947  |

### NpO<sub>2</sub>L<sub>2</sub><sup>-</sup>

E (CAM-B3LYP) = -2353.18742456 Hartree  
 Zero-point correction= 0.674730 (Hartree/Particle)  
 Sum of electronic and zero-point Energies= -2352.512695 Hartree  
 Sum of electronic and thermal Enthalpies= -2352.468433 Hartree  
 Sum of electronic and thermal Free Energies= -2352.590600 Hartree

| Center<br>Number | Atomic<br>Number | Coordinates(Angstroms) |          |           |
|------------------|------------------|------------------------|----------|-----------|
|                  |                  | X                      | Y        | Z         |
| 1                | 6                | -1.048701              | 2.960685 | -0.249484 |
| 2                | 6                | -2.078315              | 3.909768 | -0.611154 |
| 3                | 6                | -3.241888              | 3.183025 | -0.683639 |
| 4                | 6                | -2.890235              | 1.816287 | -0.386114 |
| 5                | 7                | -1.548849              | 1.724040 | -0.152305 |
| 6                | 6                | 0.366821               | 3.121893 | -0.038542 |
| 7                | 6                | 1.156954               | 4.272692 | 0.341932  |
| 8                | 7                | 1.131246               | 2.030181 | -0.144154 |
| 9                | 6                | 2.452840               | 3.824978 | 0.409972  |
| 10               | 6                | 2.416936               | 2.416267 | 0.100472  |
| 11               | 6                | -1.926137              | 5.352240 | -0.990332 |
| 12               | 1                | -1.993639              | 6.038554 | -0.138546 |
| 13               | 1                | -0.966081              | 5.533980 | -1.479690 |
| 14               | 1                | -2.711076              | 5.643450 | -1.696280 |
| 15               | 6                | 0.690724               | 5.640041 | 0.747432  |
| 16               | 1                | 0.589542               | 6.335314 | -0.093684 |
| 17               | 1                | -0.279200              | 5.594664 | 1.249150  |
| 18               | 1                | 1.398363               | 6.088770 | 1.451679  |
| 19               | 6                | -4.616620              | 3.691735 | -0.999890 |
| 20               | 6                | -5.401469              | 4.113384 | 0.249472  |

|    |   |           |           |           |
|----|---|-----------|-----------|-----------|
| 21 | 1 | -5.185050 | 2.927485  | -1.541796 |
| 22 | 1 | -4.545332 | 4.549015  | -1.680044 |
| 23 | 1 | -6.401902 | 4.478335  | -0.010784 |
| 24 | 1 | -5.512245 | 3.270739  | 0.938955  |
| 25 | 1 | -4.875618 | 4.909117  | 0.786499  |
| 26 | 6 | 3.664515  | 4.605682  | 0.826491  |
| 27 | 6 | 4.011790  | 4.427081  | 2.310468  |
| 28 | 1 | 3.506682  | 5.669776  | 0.617545  |
| 29 | 1 | 4.528346  | 4.308972  | 0.219104  |
| 30 | 1 | 4.194637  | 3.373096  | 2.538956  |
| 31 | 1 | 4.904974  | 5.000854  | 2.584152  |
| 32 | 1 | 3.183698  | 4.758802  | 2.944940  |
| 33 | 6 | -3.797146 | 0.772332  | -0.307887 |
| 34 | 1 | -4.834833 | 1.071309  | -0.427895 |
| 35 | 6 | -3.630081 | -0.592122 | -0.079454 |
| 36 | 6 | -4.763502 | -1.466734 | 0.096672  |
| 37 | 7 | -2.456464 | -1.299764 | -0.007484 |
| 38 | 6 | -4.253946 | -2.721540 | 0.283718  |
| 39 | 6 | -2.814954 | -2.579358 | 0.193003  |
| 40 | 6 | -1.983189 | -3.729673 | 0.229891  |
| 41 | 1 | -2.533516 | -4.655258 | 0.365198  |
| 42 | 6 | -0.659405 | -3.983722 | 0.055416  |
| 43 | 6 | -0.072571 | -5.283014 | -0.024628 |
| 44 | 8 | 0.350860  | -3.054476 | -0.129613 |
| 45 | 6 | 1.246582  | -5.135772 | -0.282156 |
| 46 | 1 | -0.634904 | -6.199479 | 0.088425  |
| 47 | 1 | 1.993747  | -5.906141 | -0.413395 |
| 48 | 6 | 1.537713  | -3.738856 | -0.333280 |
| 49 | 6 | 2.774067  | -3.198521 | -0.496321 |
| 50 | 1 | 3.514687  | -3.977321 | -0.647203 |
| 51 | 6 | 3.329269  | -1.892936 | -0.440800 |
| 52 | 6 | 4.764273  | -1.710773 | -0.510655 |
| 53 | 7 | 2.690751  | -0.724212 | -0.260367 |
| 54 | 6 | 4.977852  | -0.372546 | -0.331699 |
| 55 | 6 | 3.532984  | 1.599313  | 0.029579  |
| 56 | 6 | 3.675718  | 0.229050  | -0.182850 |
| 57 | 1 | 4.477788  | 2.122796  | 0.150931  |
| 58 | 6 | 6.287661  | 0.354369  | -0.299334 |
| 59 | 1 | 6.338410  | 1.139977  | -1.061897 |
| 60 | 1 | 6.463689  | 0.836298  | 0.670122  |
| 61 | 1 | 7.123740  | -0.328060 | -0.477045 |
| 62 | 6 | 5.794619  | -2.788663 | -0.683715 |
| 63 | 6 | 6.170151  | -3.489098 | 0.628957  |
| 64 | 1 | 6.700102  | -2.357740 | -1.126459 |
| 65 | 1 | 5.445785  | -3.536750 | -1.406069 |
| 66 | 1 | 6.920798  | -4.271464 | 0.465851  |
| 67 | 1 | 6.576625  | -2.768609 | 1.345703  |
| 68 | 1 | 5.291627  | -3.948342 | 1.092466  |
| 69 | 6 | -5.008481 | -3.989689 | 0.556759  |
| 70 | 6 | -5.007851 | -4.389743 | 2.038054  |
| 71 | 1 | -4.598673 | -4.814757 | -0.039472 |

|    |    |           |           |           |
|----|----|-----------|-----------|-----------|
| 72 | 1  | -6.045432 | -3.875674 | 0.220869  |
| 73 | 1  | -5.565629 | -5.319263 | 2.202246  |
| 74 | 1  | -3.986732 | -4.533497 | 2.404222  |
| 75 | 1  | -5.464194 | -3.603741 | 2.647826  |
| 76 | 6  | -6.201354 | -1.045559 | 0.092192  |
| 77 | 1  | -6.868255 | -1.909111 | 0.167613  |
| 78 | 1  | -6.435772 | -0.379400 | 0.931044  |
| 79 | 1  | -6.466382 | -0.509274 | -0.826539 |
| 80 | 8  | -0.038262 | -0.368653 | -1.932047 |
| 81 | 8  | 0.131954  | -0.332739 | 1.646725  |
| 82 | 93 | 0.040261  | -0.300185 | -0.142993 |

-----

**PuO<sub>2</sub>L<sub>2</sub>**

E (CAM-B3LYP) = -2392.6285451 Hartree  
Zero-point correction= 0.674895 (Hartree/Particle)  
Sum of electronic and zero-point Energies= -2391.953650 Hartree  
Sum of electronic and thermal Enthalpies= -2391.909478 Hartree  
Sum of electronic and thermal Free Energies= -2392.031759 Hartree

-----

| Center<br>Number | Atomic<br>Number | Coordinates(Angstroms) |         |          |
|------------------|------------------|------------------------|---------|----------|
|                  |                  | X                      | Y       | Z        |
| 1                | 6                | -1.06427               | 2.94860 | -0.25246 |
| 2                | 6                | -2.09472               | 3.89241 | -0.62774 |
| 3                | 6                | -3.25318               | 3.15943 | -0.71243 |
| 4                | 6                | -2.89665               | 1.79504 | -0.40743 |
| 5                | 7                | -1.55814               | 1.71059 | -0.15800 |
| 6                | 6                | 0.34861                | 3.11684 | -0.02891 |
| 7                | 6                | 1.12777                | 4.27145 | 0.36284  |
| 8                | 7                | 1.11992                | 2.03053 | -0.13267 |
| 9                | 6                | 2.42568                | 3.83169 | 0.44056  |
| 10               | 6                | 2.40084                | 2.42410 | 0.12436  |
| 11               | 6                | -1.94503               | 5.33528 | -1.00635 |
| 12               | 1                | -2.02490               | 6.02184 | -0.15577 |
| 13               | 1                | -0.98030               | 5.52119 | -1.48499 |
| 14               | 1                | -2.72348               | 5.62260 | -1.72110 |
| 15               | 6                | 0.64823                | 5.63423 | 0.76823  |
| 16               | 1                | 0.55259                | 6.33221 | -0.07136 |
| 17               | 1                | -0.32740               | 5.58076 | 1.25801  |
| 18               | 1                | 1.34458                | 6.08470 | 1.48262  |
| 19               | 6                | -4.62715               | 3.65946 | -1.04516 |
| 20               | 6                | -5.42698               | 4.08342 | 0.19390  |
| 21               | 1                | -5.18609               | 2.88949 | -1.58888 |
| 22               | 1                | -4.55336               | 4.51376 | -1.72889 |
| 23               | 1                | -6.42655               | 4.44204 | -0.07831 |
| 24               | 1                | -5.54055               | 3.24367 | 0.88646  |
| 25               | 1                | -4.91057               | 4.88446 | 0.73222  |
| 26               | 6                | 3.62934                | 4.61801 | 0.86947  |
| 27               | 6                | 3.97025                | 4.43113 | 2.35388  |
| 28               | 1                | 3.46484                | 5.68247 | 0.66752  |
| 29               | 1                | 4.49860                | 4.33204 | 0.26458  |

|    |   |          |          |          |
|----|---|----------|----------|----------|
| 30 | 1 | 4.15953  | 3.37684  | 2.57563  |
| 31 | 1 | 4.85786  | 5.00928  | 2.63644  |
| 32 | 1 | 3.13647  | 4.75227  | 2.98637  |
| 33 | 6 | -3.79668 | 0.74563  | -0.33170 |
| 34 | 1 | -4.83576 | 1.03564  | -0.46166 |
| 35 | 6 | -3.61987 | -0.61557 | -0.09011 |
| 36 | 6 | -4.74846 | -1.49414 | 0.09681  |
| 37 | 7 | -2.44163 | -1.31487 | -0.00835 |
| 38 | 6 | -4.23181 | -2.74302 | 0.30270  |
| 39 | 6 | -2.79382 | -2.59356 | 0.20927  |
| 40 | 6 | -1.95630 | -3.73890 | 0.25462  |
| 41 | 1 | -2.50013 | -4.66660 | 0.40154  |
| 42 | 6 | -0.63252 | -3.98487 | 0.07022  |
| 43 | 6 | -0.03870 | -5.28072 | -0.01325 |
| 44 | 8 | 0.36848  | -3.04893 | -0.12916 |
| 45 | 6 | 1.27566  | -5.12544 | -0.28976 |
| 46 | 1 | -0.59381 | -6.20040 | 0.10928  |
| 47 | 1 | 2.02630  | -5.89097 | -0.42936 |
| 48 | 6 | 1.55669  | -3.72660 | -0.34582 |
| 49 | 6 | 2.78836  | -3.17926 | -0.51899 |
| 50 | 1 | 3.53209  | -3.95295 | -0.68074 |
| 51 | 6 | 3.33584  | -1.87101 | -0.45634 |
| 52 | 6 | 4.76951  | -1.68063 | -0.53153 |
| 53 | 7 | 2.69135  | -0.70847 | -0.25836 |
| 54 | 6 | 4.97685  | -0.34381 | -0.33538 |
| 55 | 6 | 3.52238  | 1.61554  | 0.05258  |
| 56 | 6 | 3.67205  | 0.24832  | -0.17351 |
| 57 | 1 | 4.46379  | 2.14346  | 0.18131  |
| 58 | 6 | 6.28293  | 0.38974  | -0.30034 |
| 59 | 1 | 6.32736  | 1.18272  | -1.05567 |
| 60 | 1 | 6.45955  | 0.86362  | 0.67299  |
| 61 | 1 | 7.12203  | -0.28665 | -0.48695 |
| 62 | 6 | 5.80458  | -2.75046 | -0.72536 |
| 63 | 6 | 6.19411  | -3.46532 | 0.57543  |
| 64 | 1 | 6.70437  | -2.30902 | -1.16941 |
| 65 | 1 | 5.45451  | -3.49147 | -1.45440 |
| 66 | 1 | 6.94798  | -4.24120 | 0.39675  |
| 67 | 1 | 6.60191  | -2.75166 | 1.29825  |
| 68 | 1 | 5.32180  | -3.93558 | 1.03967  |
| 69 | 6 | -4.97883 | -4.01125 | 0.59530  |
| 70 | 6 | -4.97200 | -4.39042 | 2.08206  |
| 71 | 1 | -4.56635 | -4.84259 | 0.00964  |
| 72 | 1 | -6.01735 | -3.90741 | 0.26091  |
| 73 | 1 | -5.52437 | -5.32045 | 2.26114  |
| 74 | 1 | -3.94906 | -4.52356 | 2.44721  |
| 75 | 1 | -5.43075 | -3.59818 | 2.68191  |
| 76 | 6 | -6.18874 | -1.08128 | 0.08625  |
| 77 | 1 | -6.85073 | -1.94784 | 0.17035  |
| 78 | 1 | -6.42820 | -0.40728 | 0.91741  |
| 79 | 1 | -6.45592 | -0.55667 | -0.83859 |
| 80 | 8 | -0.03455 | -0.34220 | -1.90614 |

|    |    |         |          |          |
|----|----|---------|----------|----------|
| 81 | 8  | 0.12162 | -0.31015 | 1.62527  |
| 82 | 94 | 0.03980 | -0.29621 | -0.14070 |

-----

**UO<sub>2</sub>L3**

E (CAM-B3LYP) = -2617.67183683 Hartree  
 Zero-point correction= 0.765974 (Hartree/Particle)  
 Sum of electronic and zero-point Energies= -2616.905863 Hartree  
 Sum of electronic and thermal Enthalpies= -2616.854987 Hartree  
 Sum of electronic and thermal Free Energies= -2616.990501 Hartree

-----

| Center<br>Number | Atomic<br>Number | Coordinates(Angstroms) |           |           |
|------------------|------------------|------------------------|-----------|-----------|
|                  |                  | X                      | Y         | Z         |
| 1                | 7                | -2.401455              | -1.450393 | -0.254803 |
| 2                | 7                | -0.044921              | -2.555216 | 0.155205  |
| 3                | 7                | 2.326887               | -1.396722 | -0.012390 |
| 4                | 6                | -4.144181              | 0.096594  | -1.024777 |
| 5                | 6                | -3.557068              | -3.411332 | -0.569645 |
| 6                | 6                | -2.360455              | -2.781350 | -0.103933 |
| 7                | 6                | -1.110336              | -3.342620 | 0.360948  |
| 8                | 6                | -0.729395              | -4.548323 | 1.008819  |
| 9                | 6                | 0.658492               | -4.473277 | 1.165466  |
| 10               | 6                | 1.040856               | -3.228934 | 0.625024  |
| 11               | 6                | 2.289559               | -2.600748 | 0.464773  |
| 12               | 6                | 3.542171               | -0.806053 | -0.340739 |
| 13               | 6                | 4.691312               | -1.513015 | -0.729992 |
| 14               | 6                | 5.862086               | -0.849320 | -1.055843 |
| 15               | 6                | -3.837868              | -4.879247 | -0.679605 |
| 16               | 6                | -1.604703              | -5.648795 | 1.534842  |
| 17               | 6                | 1.555966               | -5.466460 | 1.845438  |
| 18               | 6                | 1.709888               | -5.207229 | 3.349965  |
| 19               | 1                | 2.373129               | -5.943893 | 3.818782  |
| 20               | 1                | 2.122732               | -4.209411 | 3.526837  |
| 21               | 1                | 0.739402               | -5.251299 | 3.854223  |
| 22               | 8                | 7.015897               | -1.458942 | -1.458696 |
| 23               | 6                | 7.004979               | -2.859497 | -1.560405 |
| 24               | 1                | 1.171214               | -6.482025 | 1.692268  |
| 25               | 1                | -4.258927              | -5.312477 | 0.235753  |
| 26               | 1                | 6.794037               | -3.337061 | -0.594235 |
| 27               | 1                | -2.927369              | -5.438506 | -0.911782 |
| 28               | 1                | -4.556115              | -5.074468 | -1.483348 |
| 29               | 1                | -1.155462              | -6.106991 | 2.422598  |
| 30               | 1                | -1.776085              | -6.456315 | 0.811830  |
| 31               | 1                | 2.549577               | -5.449863 | 1.379970  |
| 32               | 1                | 3.208257               | -3.131012 | 0.735813  |
| 33               | 1                | 4.639589               | -2.590993 | -0.810079 |
| 34               | 1                | -2.585685              | -5.267987 | 1.831117  |
| 35               | 1                | 8.003891               | -3.149025 | -1.891809 |
| 36               | 1                | 6.266568               | -3.209581 | -2.293650 |
| 37               | 1                | -5.143037              | 0.133236  | -1.451064 |
| 38               | 7                | -2.330948              | 1.510328  | -0.165445 |

|    |   |           |           |           |
|----|---|-----------|-----------|-----------|
| 39 | 7 | 0.076550  | 2.477730  | 0.298033  |
| 40 | 7 | 2.389316  | 1.220449  | 0.052860  |
| 41 | 6 | -3.579731 | 1.323371  | -0.721464 |
| 42 | 6 | -4.249818 | 2.580056  | -0.859067 |
| 43 | 6 | -3.394489 | 3.538388  | -0.354004 |
| 44 | 6 | -2.227632 | 2.826132  | 0.066374  |
| 45 | 6 | -0.950690 | 3.300980  | 0.554020  |
| 46 | 6 | -0.512670 | 4.448988  | 1.265740  |
| 47 | 6 | 0.871570  | 4.299732  | 1.412088  |
| 48 | 6 | 1.193686  | 3.072530  | 0.799692  |
| 49 | 6 | 2.410679  | 2.392911  | 0.603015  |
| 50 | 6 | 3.575639  | 0.588993  | -0.304883 |
| 51 | 6 | 4.757416  | 1.259887  | -0.658077 |
| 52 | 6 | 5.895806  | 0.559125  | -1.019247 |
| 53 | 6 | -5.627883 | 2.794226  | -1.410577 |
| 54 | 1 | -5.841224 | 2.055961  | -2.192122 |
| 55 | 1 | -5.676627 | 3.772645  | -1.903993 |
| 56 | 6 | -6.723311 | 2.724213  | -0.338690 |
| 57 | 1 | -7.717059 | 2.892545  | -0.769990 |
| 58 | 1 | -6.554523 | 3.478044  | 0.436772  |
| 59 | 1 | -6.722783 | 1.745033  | 0.150313  |
| 60 | 6 | -3.606689 | 5.021774  | -0.371589 |
| 61 | 6 | -1.334207 | 5.549253  | 1.870347  |
| 62 | 6 | 1.821975  | 5.252397  | 2.075400  |
| 63 | 6 | 2.129602  | 6.492669  | 1.227420  |
| 64 | 1 | 2.826056  | 7.166780  | 1.740016  |
| 65 | 1 | 2.573513  | 6.203942  | 0.269341  |
| 66 | 1 | 1.214203  | 7.051513  | 1.009176  |
| 67 | 8 | 7.077790  | 1.133187  | -1.391421 |
| 68 | 6 | 7.133663  | 2.536066  | -1.420075 |
| 69 | 1 | 1.410458  | 5.577216  | 3.040560  |
| 70 | 1 | -2.670466 | 5.551229  | -0.568363 |
| 71 | 1 | 6.413651  | 2.958566  | -2.133205 |
| 72 | 1 | -4.009090 | 5.415826  | 0.569601  |
| 73 | 1 | -4.313254 | 5.300252  | -1.161036 |
| 74 | 1 | -0.859161 | 5.920265  | 2.786060  |
| 75 | 1 | -2.331953 | 5.196132  | 2.143967  |
| 76 | 1 | 2.760030  | 4.736239  | 2.311488  |
| 77 | 1 | 3.354085  | 2.856658  | 0.908071  |
| 78 | 1 | 4.756462  | 2.341850  | -0.682378 |
| 79 | 1 | -1.466998 | 6.414977  | 1.209022  |
| 80 | 1 | 8.145613  | 2.794617  | -1.737223 |
| 81 | 1 | 6.944480  | 2.972225  | -0.430114 |
| 82 | 6 | -3.637866 | -1.171638 | -0.799790 |
| 83 | 6 | -4.364811 | -2.384977 | -1.015983 |
| 84 | 6 | -5.748583 | -2.500809 | -1.582357 |
| 85 | 1 | -5.839278 | -3.442816 | -2.136898 |
| 86 | 1 | -5.924616 | -1.705849 | -2.316120 |
| 87 | 6 | -6.844843 | -2.448853 | -0.510313 |
| 88 | 1 | -7.843128 | -2.543353 | -0.953464 |
| 89 | 1 | -6.714711 | -3.257537 | 0.215777  |

|    |    |           |           |           |
|----|----|-----------|-----------|-----------|
| 90 | 1  | -6.801832 | -1.503865 | 0.040194  |
| 91 | 92 | -0.146236 | -0.026923 | -0.048351 |
| 92 | 8  | -0.185284 | -0.076470 | 1.700896  |
| 93 | 8  | -0.060970 | 0.020651  | -1.797596 |

**NpO<sub>2</sub>L3<sup>-</sup>**

E (CAM-B3LYP) = -2655.10539136 Hartree  
 Zero-point correction= 0.763302 (Hartree/Particle)  
 Sum of electronic and zero-point Energies= -2654.342089 Hartree  
 Sum of electronic and thermal Enthalpies= -2654.290946 Hartree  
 Sum of electronic and thermal Free Energies= -2654.427357 Hartree

| Center<br>Number | Atomic<br>Number | Coordinates(Angstroms) |           |           |
|------------------|------------------|------------------------|-----------|-----------|
|                  |                  | X                      | Y         | Z         |
| 1                | 7                | -2.466065              | -1.488469 | -0.211215 |
| 2                | 7                | -0.062173              | -2.610204 | 0.008983  |
| 3                | 7                | 2.376362               | -1.423270 | -0.069263 |
| 4                | 6                | -4.273377              | 0.091255  | -0.731765 |
| 5                | 6                | -3.670124              | -3.443327 | -0.516155 |
| 6                | 6                | -2.391542              | -2.826817 | -0.144813 |
| 7                | 6                | -1.131687              | -3.419709 | 0.177401  |
| 8                | 6                | -0.712520              | -4.682924 | 0.720402  |
| 9                | 6                | 0.667222               | -4.592777 | 0.857176  |
| 10               | 6                | 1.019136               | -3.290935 | 0.399309  |
| 11               | 6                | 2.293972               | -2.643285 | 0.325689  |
| 12               | 6                | 3.611438               | -0.802067 | -0.262084 |
| 13               | 6                | 4.794409               | -1.501391 | -0.555692 |
| 14               | 6                | 5.989972               | -0.841779 | -0.777447 |
| 15               | 6                | -3.959372              | -4.901016 | -0.687768 |
| 16               | 6                | -1.543376              | -5.840969 | 1.191340  |
| 17               | 6                | 1.601500               | -5.608631 | 1.449543  |
| 18               | 6                | 1.821407               | -5.418372 | 2.956249  |
| 19               | 1                | 2.516883               | -6.164629 | 3.358558  |
| 20               | 1                | 2.225571               | -4.423054 | 3.164664  |
| 21               | 1                | 0.875231               | -5.503530 | 3.499992  |
| 22               | 8                | 7.172357               | -1.452004 | -1.082367 |
| 23               | 6                | 7.167813               | -2.852402 | -1.190999 |
| 24               | 1                | 1.221019               | -6.620376 | 1.265444  |
| 25               | 1                | -4.190952              | -5.403454 | 0.257314  |
| 26               | 1                | 6.874359               | -3.333320 | -0.248440 |
| 27               | 1                | -3.104233              | -5.419933 | -1.128731 |
| 28               | 1                | -4.817038              | -5.048596 | -1.351349 |
| 29               | 1                | -0.983307              | -6.441640 | 1.914695  |
| 30               | 1                | -1.848873              | -6.516812 | 0.383806  |
| 31               | 1                | 2.572436               | -5.561268 | 0.940340  |
| 32               | 1                | 3.184074               | -3.211745 | 0.621727  |
| 33               | 1                | 4.751504               | -2.578627 | -0.646324 |
| 34               | 1                | -2.455161              | -5.504619 | 1.693680  |
| 35               | 1                | 8.190952               | -3.142283 | -1.437115 |
| 36               | 1                | 6.494301               | -3.197471 | -1.986346 |



|    |   |           |           |           |
|----|---|-----------|-----------|-----------|
| 37 | 1 | -5.314760 | 0.123778  | -1.036694 |
| 38 | 7 | -2.396919 | 1.549930  | -0.113457 |
| 39 | 7 | 0.055839  | 2.547102  | 0.175558  |
| 40 | 7 | 2.436103  | 1.260757  | 0.015244  |
| 41 | 6 | -3.680019 | 1.330060  | -0.510202 |
| 42 | 6 | -4.392760 | 2.599070  | -0.650361 |
| 43 | 6 | -3.507745 | 3.572728  | -0.305142 |
| 44 | 6 | -2.262028 | 2.874638  | 0.034897  |
| 45 | 6 | -0.976753 | 3.389829  | 0.395871  |
| 46 | 6 | -0.507305 | 4.593259  | 1.021316  |
| 47 | 6 | 0.868240  | 4.433277  | 1.156677  |
| 48 | 6 | 1.165377  | 3.152600  | 0.611981  |
| 49 | 6 | 2.408170  | 2.450838  | 0.499689  |
| 50 | 6 | 3.642384  | 0.598152  | -0.215915 |
| 51 | 6 | 4.855882  | 1.261914  | -0.463990 |
| 52 | 6 | 6.021315  | 0.565718  | -0.730470 |
| 53 | 6 | -5.819324 | 2.756090  | -1.082228 |
| 54 | 1 | -6.055021 | 2.026771  | -1.865989 |
| 55 | 1 | -5.957636 | 3.742485  | -1.539409 |
| 56 | 6 | -6.817617 | 2.598088  | 0.072479  |
| 57 | 1 | -7.849976 | 2.712103  | -0.276802 |
| 58 | 1 | -6.633324 | 3.348120  | 0.847882  |
| 59 | 1 | -6.721457 | 1.613206  | 0.539788  |
| 60 | 6 | -3.724940 | 5.050437  | -0.391693 |
| 61 | 6 | -1.291216 | 5.748583  | 1.569720  |
| 62 | 6 | 1.846570  | 5.404637  | 1.749778  |
| 63 | 6 | 2.266182  | 6.516173  | 0.779531  |
| 64 | 1 | 2.983400  | 7.204540  | 1.242385  |
| 65 | 1 | 2.728050  | 6.091886  | -0.117745 |
| 66 | 1 | 1.396711  | 7.097112  | 0.455652  |
| 67 | 8 | 7.230027  | 1.141580  | -0.995555 |
| 68 | 6 | 7.288406  | 2.544976  | -1.010182 |
| 69 | 1 | 1.418649  | 5.864249  | 2.650335  |
| 70 | 1 | -2.835147 | 5.554168  | -0.778185 |
| 71 | 1 | 6.632945  | 2.972315  | -1.780228 |
| 72 | 1 | -3.958664 | 5.504429  | 0.577220  |
| 73 | 1 | -4.556877 | 5.279203  | -1.065070 |
| 74 | 1 | -0.728386 | 6.242781  | 2.368900  |
| 75 | 1 | -2.241885 | 5.422907  | 2.001197  |
| 76 | 1 | 2.741121  | 4.869246  | 2.089289  |
| 77 | 1 | 3.322142  | 2.950213  | 0.843066  |
| 78 | 1 | 4.860547  | 2.343650  | -0.483663 |
| 79 | 1 | -1.520160 | 6.517470  | 0.821687  |
| 80 | 1 | 8.324079  | 2.804488  | -1.236980 |
| 81 | 1 | 7.014506  | 2.974400  | -0.037394 |
| 82 | 6 | -3.736879 | -1.186886 | -0.585054 |
| 83 | 6 | -4.509568 | -2.409822 | -0.796183 |
| 84 | 6 | -5.944624 | -2.472827 | -1.224230 |
| 85 | 1 | -6.133546 | -3.422766 | -1.737077 |
| 86 | 1 | -6.149765 | -1.688523 | -1.962184 |
| 87 | 6 | -6.927005 | -2.335197 | -0.053421 |

|    |    |           |           |           |
|----|----|-----------|-----------|-----------|
| 88 | 1  | -7.965865 | -2.378386 | -0.399389 |
| 89 | 1  | -6.774519 | -3.137757 | 0.674878  |
| 90 | 1  | -6.780000 | -1.385481 | 0.470084  |
| 91 | 8  | -0.070240 | -0.074762 | 1.679121  |
| 92 | 8  | -0.177870 | 0.029418  | -1.901494 |
| 93 | 93 | -0.138557 | -0.020937 | -0.110813 |

**PuO<sub>2</sub>L<sub>3</sub>**

E (CAM-B3LYP) = -2694.52435856 Hartree

Zero-point correction=

0.765863 (Hartree/Particle)

Sum of electronic and zero-point Energies=

-2693.758495 Hartree

Sum of electronic and thermal Enthalpies=

-2693.707634 Hartree

Sum of electronic and thermal Free Energies=

-2693.844284 Hartree

| Center<br>Number | Atomic<br>Number | Coordinates(Angstroms) |           |           |
|------------------|------------------|------------------------|-----------|-----------|
|                  |                  | X                      | Y         | Z         |
| 1                | 7                | -2.408498              | -1.440522 | -0.252267 |
| 2                | 7                | -0.046868              | -2.531501 | 0.169681  |
| 3                | 7                | 2.335414               | -1.391015 | -0.021250 |
| 4                | 6                | -4.150005              | 0.094775  | -1.039464 |
| 5                | 6                | -3.550327              | -3.409243 | -0.573296 |
| 6                | 6                | -2.361608              | -2.768843 | -0.098371 |
| 7                | 6                | -1.111266              | -3.320781 | 0.376387  |
| 8                | 6                | -0.730759              | -4.523201 | 1.028407  |
| 9                | 6                | 0.657616               | -4.447138 | 1.185625  |
| 10               | 6                | 1.039458               | -3.205192 | 0.641398  |
| 11               | 6                | 2.292609               | -2.587254 | 0.470416  |
| 12               | 6                | 3.550187               | -0.803990 | -0.352690 |
| 13               | 6                | 4.698788               | -1.510907 | -0.743197 |
| 14               | 6                | 5.868135               | -0.845951 | -1.072603 |
| 15               | 6                | -3.820267              | -4.879270 | -0.683196 |
| 16               | 6                | -1.606645              | -5.621648 | 1.557768  |
| 17               | 6                | 1.554662               | -5.439788 | 1.867019  |
| 18               | 6                | 1.709259               | -5.178794 | 3.371185  |
| 19               | 1                | 2.370738               | -5.916267 | 3.841292  |
| 20               | 1                | 2.124747               | -4.181751 | 3.546497  |
| 21               | 1                | 0.738659               | -5.219840 | 3.875537  |
| 22               | 8                | 7.022044               | -1.454928 | -1.477148 |
| 23               | 6                | 7.012307               | -2.855543 | -1.576649 |
| 24               | 1                | 1.168759               | -6.455244 | 1.715706  |
| 25               | 1                | -4.250906              | -5.313482 | 0.227375  |
| 26               | 1                | 6.804223               | -3.331947 | -0.609271 |
| 27               | 1                | -2.903156              | -5.433341 | -0.901579 |
| 28               | 1                | -4.526476              | -5.081179 | -1.496049 |
| 29               | 1                | -1.165861              | -6.066798 | 2.456512  |
| 30               | 1                | -1.765550              | -6.439069 | 0.842948  |
| 31               | 1                | 2.548310               | -5.425082 | 1.401577  |
| 32               | 1                | 3.208334               | -3.121101 | 0.746434  |
| 33               | 1                | 4.647724               | -2.589302 | -0.819770 |
| 34               | 1                | -2.592936              | -5.242077 | 1.837387  |

|    |   |           |           |           |
|----|---|-----------|-----------|-----------|
| 35 | 1 | 8.010678  | -3.144654 | -1.910128 |
| 36 | 1 | 6.272382  | -3.207649 | -2.307441 |
| 37 | 1 | -5.145216 | 0.131062  | -1.474596 |
| 38 | 7 | -2.340249 | 1.498169  | -0.163618 |
| 39 | 7 | 0.070500  | 2.453959  | 0.310261  |
| 40 | 7 | 2.396073  | 1.218249  | 0.041889  |
| 41 | 6 | -3.584950 | 1.319469  | -0.729956 |
| 42 | 6 | -4.248677 | 2.579777  | -0.871037 |
| 43 | 6 | -3.392636 | 3.532314  | -0.357074 |
| 44 | 6 | -2.232917 | 2.811059  | 0.071185  |
| 45 | 6 | -0.956550 | 3.277808  | 0.567512  |
| 46 | 6 | -0.520180 | 4.422910  | 1.282961  |
| 47 | 6 | 0.864709  | 4.274038  | 1.429633  |
| 48 | 6 | 1.187643  | 3.049846  | 0.813488  |
| 49 | 6 | 2.410312  | 2.382106  | 0.606534  |
| 50 | 6 | 3.582827  | 0.591472  | -0.317780 |
| 51 | 6 | 4.763230  | 1.263431  | -0.673011 |
| 52 | 6 | 5.901007  | 0.562592  | -1.036900 |
| 53 | 6 | -5.621276 | 2.801088  | -1.433276 |
| 54 | 1 | -5.831893 | 2.064458  | -2.217204 |
| 55 | 1 | -5.661849 | 3.780324  | -1.926021 |
| 56 | 6 | -6.725806 | 2.734907  | -0.370508 |
| 57 | 1 | -7.715452 | 2.908070  | -0.809442 |
| 58 | 1 | -6.559801 | 3.487173  | 0.407101  |
| 59 | 1 | -6.733402 | 1.755214  | 0.117416  |
| 60 | 6 | -3.596063 | 5.017007  | -0.374016 |
| 61 | 6 | -1.343572 | 5.519747  | 1.891343  |
| 62 | 6 | 1.813970  | 5.226696  | 2.094628  |
| 63 | 6 | 2.119142  | 6.469522  | 1.249467  |
| 64 | 1 | 2.814287  | 7.143999  | 1.763431  |
| 65 | 1 | 2.563565  | 6.183677  | 0.290748  |
| 66 | 1 | 1.202590  | 7.026943  | 1.032432  |
| 67 | 8 | 7.082358  | 1.137055  | -1.411516 |
| 68 | 6 | 7.137621  | 2.539859  | -1.439979 |
| 69 | 1 | 1.402164  | 5.548860  | 3.060630  |
| 70 | 1 | -2.655005 | 5.541477  | -0.561321 |
| 71 | 1 | 6.415631  | 2.962375  | -2.151142 |
| 72 | 1 | -4.004712 | 5.412441  | 0.564011  |
| 73 | 1 | -4.293885 | 5.300954  | -1.169405 |
| 74 | 1 | -0.875837 | 5.880009  | 2.815224  |
| 75 | 1 | -2.344869 | 5.166964  | 2.152037  |
| 76 | 1 | 2.753139  | 4.711857  | 2.329277  |
| 77 | 1 | 3.350426  | 2.849879  | 0.917335  |
| 78 | 1 | 4.761572  | 2.345574  | -0.695117 |
| 79 | 1 | -1.467796 | 6.392782  | 1.237902  |
| 80 | 1 | 8.148677  | 2.798957  | -1.759612 |
| 81 | 1 | 6.950704  | 2.975848  | -0.449497 |
| 82 | 6 | -3.641317 | -1.171170 | -0.808553 |
| 83 | 6 | -4.360221 | -2.389165 | -1.029090 |
| 84 | 6 | -5.738247 | -2.513766 | -1.607498 |
| 85 | 1 | -5.818448 | -3.456266 | -2.163045 |

|    |    |           |           |           |
|----|----|-----------|-----------|-----------|
| 86 | 1  | -5.913034 | -1.719564 | -2.342482 |
| 87 | 6  | -6.844355 | -2.468877 | -0.545286 |
| 88 | 1  | -7.838282 | -2.569345 | -0.997012 |
| 89 | 1  | -6.715541 | -3.276936 | 0.181765  |
| 90 | 1  | -6.811800 | -1.523776 | 0.005761  |
| 91 | 8  | -0.195886 | -0.074167 | 1.673314  |
| 92 | 8  | -0.069009 | 0.019728  | -1.759933 |
| 93 | 94 | -0.144482 | -0.026665 | -0.042829 |

-----

**UO<sub>2</sub>L3<sup>2-</sup>**

E (CAM-B3LYP) = -2617.60619876 Hartree  
 Zero-point correction= 0.760872 (Hartree/Particle)  
 Sum of electronic and zero-point Energies= -2616.845327 Hartree  
 Sum of electronic and thermal Enthalpies= -2616.794151 Hartree  
 Sum of electronic and thermal Free Energies= -2616.930400 Hartree

-----

| Center<br>Number | Atomic<br>Number | Coordinates(Angstroms) |           |           |
|------------------|------------------|------------------------|-----------|-----------|
|                  |                  | X                      | Y         | Z         |
| 1                | 7                | -2.409724              | -1.456020 | -0.255676 |
| 2                | 7                | -0.022196              | -2.560573 | 0.121456  |
| 3                | 7                | 2.381817               | -1.395295 | -0.044603 |
| 4                | 6                | -4.176183              | 0.094334  | -1.017643 |
| 5                | 6                | -3.530236              | -3.438485 | -0.535284 |
| 6                | 6                | -2.348922              | -2.817601 | -0.094030 |
| 7                | 6                | -1.080354              | -3.353733 | 0.331663  |
| 8                | 6                | -0.677079              | -4.563163 | 0.976626  |
| 9                | 6                | 0.708116               | -4.478721 | 1.120292  |
| 10               | 6                | 1.081609               | -3.227024 | 0.582035  |
| 11               | 6                | 2.325665               | -2.602897 | 0.434841  |
| 12               | 6                | 3.598748               | -0.809270 | -0.343516 |
| 13               | 6                | 4.759774               | -1.509105 | -0.706071 |
| 14               | 6                | 5.942346               | -0.844413 | -1.005930 |
| 15               | 6                | -3.812250              | -4.906286 | -0.667488 |
| 16               | 6                | -1.551538              | -5.651694 | 1.527279  |
| 17               | 6                | 1.616375               | -5.464017 | 1.797808  |
| 18               | 6                | 1.783416               | -5.193834 | 3.299436  |
| 19               | 1                | 2.457780               | -5.920747 | 3.771468  |
| 20               | 1                | 2.187628               | -4.190001 | 3.460560  |
| 21               | 1                | 0.816674               | -5.240163 | 3.811021  |
| 22               | 8                | 7.112501               | -1.467017 | -1.378432 |
| 23               | 6                | 7.084611               | -2.862962 | -1.480052 |
| 24               | 1                | 1.234304               | -6.483662 | 1.657787  |
| 25               | 1                | -4.299319              | -5.349993 | 0.212967  |
| 26               | 1                | 6.843066               | -3.342131 | -0.520865 |
| 27               | 1                | -2.892970              | -5.472511 | -0.843309 |
| 28               | 1                | -4.476959              | -5.095977 | -1.519833 |
| 29               | 1                | -1.112979              | -6.084350 | 2.435375  |
| 30               | 1                | -1.722235              | -6.484274 | 0.830581  |
| 31               | 1                | 2.607234               | -5.446152 | 1.325424  |
| 32               | 1                | 3.237314               | -3.136447 | 0.733482  |

|    |   |           |           |           |
|----|---|-----------|-----------|-----------|
| 33 | 1 | 4.709827  | -2.587964 | -0.780920 |
| 34 | 1 | -2.535347 | -5.256405 | 1.796151  |
| 35 | 1 | 8.087611  | -3.169629 | -1.788128 |
| 36 | 1 | 6.358405  | -3.207947 | -2.229002 |
| 37 | 1 | -5.181632 | 0.129847  | -1.426607 |
| 38 | 7 | -2.341127 | 1.513010  | -0.166171 |
| 39 | 7 | 0.096103  | 2.484165  | 0.265260  |
| 40 | 7 | 2.442919  | 1.223965  | 0.017429  |
| 41 | 6 | -3.594313 | 1.334885  | -0.693862 |
| 42 | 6 | -4.252326 | 2.588933  | -0.815371 |
| 43 | 6 | -3.369628 | 3.557824  | -0.321282 |
| 44 | 6 | -2.218099 | 2.857810  | 0.077661  |
| 45 | 6 | -0.925176 | 3.310640  | 0.526755  |
| 46 | 6 | -0.467439 | 4.460484  | 1.238254  |
| 47 | 6 | 0.914003  | 4.303658  | 1.373321  |
| 48 | 6 | 1.229264  | 3.071687  | 0.760023  |
| 49 | 6 | 2.443299  | 2.397616  | 0.575575  |
| 50 | 6 | 3.632033  | 0.595832  | -0.308313 |
| 51 | 6 | 4.824454  | 1.258706  | -0.635265 |
| 52 | 6 | 5.975362  | 0.556019  | -0.969937 |
| 53 | 6 | -5.640519 | 2.807401  | -1.336679 |
| 54 | 1 | -5.847074 | 2.113751  | -2.162327 |
| 55 | 1 | -5.726706 | 3.816089  | -1.765161 |
| 56 | 6 | -6.730674 | 2.635502  | -0.268530 |
| 57 | 1 | -7.738564 | 2.791127  | -0.678747 |
| 58 | 1 | -6.580666 | 3.346406  | 0.551358  |
| 59 | 1 | -6.683366 | 1.628852  | 0.158118  |
| 60 | 6 | -3.582745 | 5.042469  | -0.362684 |
| 61 | 6 | -1.290223 | 5.544899  | 1.868224  |
| 62 | 6 | 1.873154  | 5.252004  | 2.029820  |
| 63 | 6 | 2.192858  | 6.483315  | 1.172252  |
| 64 | 1 | 2.895359  | 7.159803  | 1.676936  |
| 65 | 1 | 2.633537  | 6.178826  | 0.217457  |
| 66 | 1 | 1.280313  | 7.044501  | 0.947055  |
| 67 | 8 | 7.173781  | 1.141604  | -1.311327 |
| 68 | 6 | 7.210844  | 2.540699  | -1.341533 |
| 69 | 1 | 1.464765  | 5.592265  | 2.992209  |
| 70 | 1 | -2.637406 | 5.574472  | -0.503812 |
| 71 | 1 | 6.502456  | 2.956770  | -2.071198 |
| 72 | 1 | -4.050255 | 5.453396  | 0.543935  |
| 73 | 1 | -4.236051 | 5.315325  | -1.201179 |
| 74 | 1 | -0.827109 | 5.888650  | 2.802848  |
| 75 | 1 | -2.290774 | 5.177436  | 2.113693  |
| 76 | 1 | 2.807679  | 4.730126  | 2.269167  |
| 77 | 1 | 3.378699  | 2.862796  | 0.911928  |
| 78 | 1 | 4.823923  | 2.341211  | -0.655032 |
| 79 | 1 | -1.422924 | 6.434613  | 1.236544  |
| 80 | 1 | 8.227399  | 2.815854  | -1.634552 |
| 81 | 1 | 6.990443  | 2.981058  | -0.358934 |
| 82 | 6 | -3.652019 | -1.188939 | -0.771156 |
| 83 | 6 | -4.366204 | -2.401917 | -0.969237 |

|    |    |           |           |           |
|----|----|-----------|-----------|-----------|
| 84 | 6  | -5.761547 | -2.524666 | -1.502615 |
| 85 | 1  | -5.892204 | -3.499868 | -1.992883 |
| 86 | 1  | -5.934767 | -1.772529 | -2.283541 |
| 87 | 6  | -6.845230 | -2.370370 | -0.425252 |
| 88 | 1  | -7.858200 | -2.453259 | -0.843986 |
| 89 | 1  | -6.730051 | -3.137707 | 0.348101  |
| 90 | 1  | -6.752680 | -1.395867 | 0.064015  |
| 91 | 92 | -0.260726 | -0.023652 | -0.077740 |
| 92 | 8  | -0.273681 | -0.074104 | 1.677591  |
| 93 | 8  | -0.150268 | 0.023505  | -1.830429 |

-----

**NpO<sub>2</sub>L<sub>3</sub><sup>2-</sup>**

E (CAM-B3LYP) = -2655.09426284 Hartree

Zero-point correction=

0.761727 (Hartree/Particle)

Sum of electronic and zero-point Energies=

-2654.332536 Hartree

Sum of electronic and thermal Enthalpies=

-2654.281127 Hartree

Sum of electronic and thermal Free Energies=

-2654.419400 Hartree

-----

| Center<br>Number | Atomic<br>Number | Coordinates(Angstroms) |           |           |
|------------------|------------------|------------------------|-----------|-----------|
|                  |                  | X                      | Y         | Z         |
| 1                | 7                | -2.488554              | -1.498794 | -0.181829 |
| 2                | 7                | -0.041313              | -2.629782 | -0.056787 |
| 3                | 7                | 2.408552               | -1.424798 | -0.113522 |
| 4                | 6                | -4.297282              | 0.083866  | -0.699787 |
| 5                | 6                | -3.635610              | -3.448705 | -0.541996 |
| 6                | 6                | -2.398423              | -2.827067 | -0.150592 |
| 7                | 6                | -1.100092              | -3.409747 | 0.176952  |
| 8                | 6                | -0.696955              | -4.631765 | 0.794217  |
| 9                | 6                | 0.693988               | -4.554760 | 0.914467  |
| 10               | 6                | 1.057653               | -3.294969 | 0.378726  |
| 11               | 6                | 2.314717               | -2.644770 | 0.304537  |
| 12               | 6                | 3.637092               | -0.809246 | -0.295399 |
| 13               | 6                | 4.828836               | -1.503630 | -0.569002 |
| 14               | 6                | 6.030700               | -0.845005 | -0.773401 |
| 15               | 6                | -3.893076              | -4.909131 | -0.762469 |
| 16               | 6                | -1.560278              | -5.734766 | 1.335841  |
| 17               | 6                | 1.607701               | -5.549252 | 1.572193  |
| 18               | 6                | 1.791572               | -5.298972 | 3.075584  |
| 19               | 1                | 2.471157               | -6.031714 | 3.531762  |
| 20               | 1                | 2.195989               | -4.296863 | 3.246564  |
| 21               | 1                | 0.830063               | -5.351591 | 3.596471  |
| 22               | 8                | 7.224000               | -1.467510 | -1.059854 |
| 23               | 6                | 7.202389               | -2.863774 | -1.162990 |
| 24               | 1                | 1.225323               | -6.568179 | 1.424426  |
| 25               | 1                | -4.252019              | -5.435725 | 0.132142  |
| 26               | 1                | 6.887252               | -3.341658 | -0.224890 |
| 27               | 1                | -2.981851              | -5.420254 | -1.087622 |
| 28               | 1                | -4.650328              | -5.058310 | -1.542466 |
| 29               | 1                | -1.074001              | -6.230316 | 2.184950  |
| 30               | 1                | -1.792749              | -6.519834 | 0.602322  |

|    |   |           |           |           |
|----|---|-----------|-----------|-----------|
| 31 | 1 | 2.594081  | -5.528631 | 1.090173  |
| 32 | 1 | 3.204890  | -3.199070 | 0.636159  |
| 33 | 1 | 4.784127  | -2.581731 | -0.654553 |
| 34 | 1 | -2.517294 | -5.344821 | 1.696299  |
| 35 | 1 | 8.225683  | -3.171562 | -1.393323 |
| 36 | 1 | 6.535149  | -3.207781 | -1.965243 |
| 37 | 1 | -5.340691 | 0.116518  | -1.009962 |
| 38 | 7 | -2.420802 | 1.549614  | -0.086950 |
| 39 | 7 | 0.075747  | 2.562030  | 0.104635  |
| 40 | 7 | 2.469291  | 1.260501  | -0.038106 |
| 41 | 6 | -3.717707 | 1.330325  | -0.490086 |
| 42 | 6 | -4.395096 | 2.587258  | -0.652854 |
| 43 | 6 | -3.477992 | 3.567262  | -0.330143 |
| 44 | 6 | -2.271320 | 2.868202  | 0.024168  |
| 45 | 6 | -0.948735 | 3.373304  | 0.382355  |
| 46 | 6 | -0.494426 | 4.540206  | 1.065168  |
| 47 | 6 | 0.892707  | 4.394907  | 1.181699  |
| 48 | 6 | 1.202206  | 3.153490  | 0.574654  |
| 49 | 6 | 2.429124  | 2.451468  | 0.462677  |
| 50 | 6 | 3.669165  | 0.600687  | -0.253448 |
| 51 | 6 | 4.891268  | 1.255856  | -0.486000 |
| 52 | 6 | 6.062528  | 0.557111  | -0.731152 |
| 53 | 6 | -5.821763 | 2.786809  | -1.070043 |
| 54 | 1 | -6.127386 | 1.997578  | -1.767616 |
| 55 | 1 | -5.917054 | 3.730124  | -1.624278 |
| 56 | 6 | -6.799201 | 2.810460  | 0.113133  |
| 57 | 1 | -7.835499 | 2.961405  | -0.217313 |
| 58 | 1 | -6.540051 | 3.614744  | 0.809442  |
| 59 | 1 | -6.748289 | 1.868565  | 0.668132  |
| 60 | 6 | -3.668058 | 5.048534  | -0.463112 |
| 61 | 6 | -1.309204 | 5.639939  | 1.680557  |
| 62 | 6 | 1.852416  | 5.357284  | 1.817316  |
| 63 | 6 | 2.194720  | 6.557914  | 0.924869  |
| 64 | 1 | 2.898290  | 7.244530  | 1.414998  |
| 65 | 1 | 2.642437  | 6.218813  | -0.014926 |
| 66 | 1 | 1.289976  | 7.120053  | 0.671076  |
| 67 | 8 | 7.283102  | 1.141110  | -0.981316 |
| 68 | 6 | 7.324340  | 2.540589  | -1.002542 |
| 69 | 1 | 1.439199  | 5.733339  | 2.764402  |
| 70 | 1 | -2.731225 | 5.536554  | -0.748229 |
| 71 | 1 | 6.674392  | 2.960526  | -1.782519 |
| 72 | 1 | -4.013312 | 5.535428  | 0.459041  |
| 73 | 1 | -4.409073 | 5.278970  | -1.238974 |
| 74 | 1 | -0.806137 | 6.043286  | 2.568988  |
| 75 | 1 | -2.288402 | 5.272464  | 2.002642  |
| 76 | 1 | 2.780624  | 4.837047  | 2.083976  |
| 77 | 1 | 3.341915  | 2.938107  | 0.835477  |
| 78 | 1 | 4.894800  | 2.338108  | -0.507177 |
| 79 | 1 | -1.492952 | 6.491155  | 1.009328  |
| 80 | 1 | 8.360751  | 2.815086  | -1.215635 |
| 81 | 1 | 7.029578  | 2.976528  | -0.037774 |

|    |    |           |           |           |
|----|----|-----------|-----------|-----------|
| 82 | 6  | -3.774407 | -1.197655 | -0.566984 |
| 83 | 6  | -4.507791 | -2.410944 | -0.802606 |
| 84 | 6  | -5.942680 | -2.520831 | -1.225059 |
| 85 | 1  | -6.081776 | -3.425408 | -1.832077 |
| 86 | 1  | -6.213001 | -1.679664 | -1.874888 |
| 87 | 6  | -6.918586 | -2.568135 | -0.041289 |
| 88 | 1  | -7.961187 | -2.651728 | -0.375784 |
| 89 | 1  | -6.695935 | -3.422617 | 0.606138  |
| 90 | 1  | -6.823478 | -1.663486 | 0.567253  |
| 91 | 8  | -0.147610 | -0.078275 | 1.640187  |
| 92 | 8  | -0.174305 | 0.031351  | -1.950937 |
| 93 | 93 | -0.181082 | -0.022977 | -0.153899 |

**PuO<sub>2</sub>L<sub>3</sub><sup>2-</sup>**

E (CAM-B3LYP) = -2694.5306659 Hartree  
 Zero-point correction= 0.761892 (Hartree/Particle)  
 Sum of electronic and zero-point Energies= -2693.768774 Hartree  
 Sum of electronic and thermal Enthalpies= -2693.717472 Hartree  
 Sum of electronic and thermal Free Energies= -2693.855759 Hartree

| Center<br>Number | Atomic<br>Number | Coordinates(Angstroms) |          |          |
|------------------|------------------|------------------------|----------|----------|
|                  |                  | X                      | Y        | Z        |
| 1                | 7                | -2.49505               | -1.49411 | -0.16684 |
| 2                | 7                | -0.04469               | -2.62003 | -0.05002 |
| 3                | 7                | 2.40718                | -1.42150 | -0.11591 |
| 4                | 6                | -4.30409               | 0.08362  | -0.69328 |
| 5                | 6                | -3.63242               | -3.44669 | -0.54942 |
| 6                | 6                | -2.40080               | -2.82171 | -0.14527 |
| 7                | 6                | -1.10181               | -3.40222 | 0.18115  |
| 8                | 6                | -0.69825               | -4.62733 | 0.79226  |
| 9                | 6                | 0.69254                | -4.55061 | 0.91124  |
| 10               | 6                | 1.05488                | -3.28808 | 0.38084  |
| 11               | 6                | 2.31256                | -2.64068 | 0.30383  |
| 12               | 6                | 3.63591                | -0.80789 | -0.30027 |
| 13               | 6                | 4.82747                | -1.50237 | -0.57443 |
| 14               | 6                | 6.02875                | -0.84329 | -0.78163 |
| 15               | 6                | -3.88111               | -4.90661 | -0.78306 |
| 16               | 6                | -1.56192               | -5.73232 | 1.32927  |
| 17               | 6                | 1.60744                | -5.54881 | 1.56169  |
| 18               | 6                | 1.79571                | -5.30601 | 3.06578  |
| 19               | 1                | 2.47542                | -6.04186 | 3.51677  |
| 20               | 1                | 2.20218                | -4.30534 | 3.24042  |
| 21               | 1                | 0.83545                | -5.35978 | 3.58888  |
| 22               | 8                | 7.22206                | -1.46570 | -1.06890 |
| 23               | 6                | 7.20099                | -2.86209 | -1.16990 |
| 24               | 1                | 1.22367                | -6.56670 | 1.41028  |
| 25               | 1                | -4.24296               | -5.44230 | 0.10501  |
| 26               | 1                | 6.88753                | -3.33877 | -0.23062 |
| 27               | 1                | -2.96517               | -5.41057 | -1.10635 |
| 28               | 1                | -4.63272               | -5.05354 | -1.56900 |



|    |   |          |          |          |
|----|---|----------|----------|----------|
| 29 | 1 | -1.07891 | -6.22769 | 2.18045  |
| 30 | 1 | -1.78969 | -6.51743 | 0.59424  |
| 31 | 1 | 2.59254  | -5.52682 | 1.07711  |
| 32 | 1 | 3.20261  | -3.19633 | 0.63387  |
| 33 | 1 | 4.78330  | -2.58071 | -0.65767 |
| 34 | 1 | -2.52134 | -5.34416 | 1.68523  |
| 35 | 1 | 8.22407  | -3.16976 | -1.40139 |
| 36 | 1 | 6.53265  | -3.20767 | -1.97058 |
| 37 | 1 | -5.34566 | 0.11615  | -1.00979 |
| 38 | 7 | -2.42806 | 1.54505  | -0.07313 |
| 39 | 7 | 0.07077  | 2.55526  | 0.10525  |
| 40 | 7 | 2.46690  | 1.25980  | -0.04502 |
| 41 | 6 | -3.72389 | 1.32889  | -0.48125 |
| 42 | 6 | -4.39734 | 2.58682  | -0.65377 |
| 43 | 6 | -3.47823 | 3.56549  | -0.33340 |
| 44 | 6 | -2.27564 | 2.86340  | 0.02949  |
| 45 | 6 | -0.95227 | 3.36727  | 0.38427  |
| 46 | 6 | -0.49747 | 4.53607  | 1.06373  |
| 47 | 6 | 0.88977  | 4.39178  | 1.17707  |
| 48 | 6 | 1.19799  | 3.14926  | 0.57148  |
| 49 | 6 | 2.42567  | 2.45007  | 0.45696  |
| 50 | 6 | 3.66746  | 0.60202  | -0.26063 |
| 51 | 6 | 4.88882  | 1.25765  | -0.49560 |
| 52 | 6 | 6.06008  | 0.55888  | -0.74139 |
| 53 | 6 | -5.82152 | 2.78824  | -1.07859 |
| 54 | 1 | -6.12556 | 1.99763  | -1.77533 |
| 55 | 1 | -5.91212 | 3.73021  | -1.63596 |
| 56 | 6 | -6.80491 | 2.81743  | 0.09955  |
| 57 | 1 | -7.83923 | 2.96998  | -0.23644 |
| 58 | 1 | -6.54727 | 3.62298  | 0.79498  |
| 59 | 1 | -6.75905 | 1.87691  | 0.65731  |
| 60 | 6 | -3.66137 | 5.04673  | -0.47628 |
| 61 | 6 | -1.31260 | 5.63563  | 1.67895  |
| 62 | 6 | 1.85060  | 5.35606  | 1.80809  |
| 63 | 6 | 2.19145  | 6.55397  | 0.91141  |
| 64 | 1 | 2.89557  | 7.24232  | 1.39836  |
| 65 | 1 | 2.63794  | 6.21193  | -0.02790 |
| 66 | 1 | 1.28621  | 7.11507  | 0.65708  |
| 67 | 8 | 7.28020  | 1.14307  | -0.99393 |
| 68 | 6 | 7.32116  | 2.54252  | -1.01524 |
| 69 | 1 | 1.43872  | 5.73518  | 2.75458  |
| 70 | 1 | -2.72117 | 5.52883  | -0.76060 |
| 71 | 1 | 6.67020  | 2.96240  | -1.79443 |
| 72 | 1 | -4.00795 | 5.54101  | 0.44150  |
| 73 | 1 | -4.39838 | 5.27582  | -1.25640 |
| 74 | 1 | -0.81117 | 6.03779  | 2.56894  |
| 75 | 1 | -2.29268 | 5.26823  | 1.99851  |
| 76 | 1 | 2.77934  | 4.83685  | 2.07497  |
| 77 | 1 | 3.33832  | 2.93787  | 0.82889  |
| 78 | 1 | 4.89184  | 2.33993  | -0.51778 |
| 79 | 1 | -1.49470 | 6.48782  | 1.00845  |

|    |    |          |          |          |
|----|----|----------|----------|----------|
| 80 | 1  | 8.35727  | 2.81726  | -1.22960 |
| 81 | 1  | 7.02743  | 2.97845  | -0.05016 |
| 82 | 6  | -3.77940 | -1.19658 | -0.55957 |
| 83 | 6  | -4.50708 | -2.41081 | -0.80845 |
| 84 | 6  | -5.93806 | -2.52341 | -1.24332 |
| 85 | 1  | -6.06807 | -3.42288 | -1.85997 |
| 86 | 1  | -6.20721 | -1.67744 | -1.88737 |
| 87 | 6  | -6.92348 | -2.58658 | -0.06824 |
| 88 | 1  | -7.96291 | -2.67219 | -0.41210 |
| 89 | 1  | -6.70194 | -3.44602 | 0.57301  |
| 90 | 1  | -6.83804 | -1.68720 | 0.54953  |
| 91 | 8  | -0.10618 | -0.07802 | 1.63677  |
| 92 | 8  | -0.21099 | 0.03232  | -1.91089 |
| 93 | 94 | -0.17353 | -0.02262 | -0.13615 |

---
